# Supplementary material for: Relations between spontaneous portosystemic shunts and outcomes in hepatitis B virus-related cirrhotic patients with esophagogastric variceal bleeding after repeated endotherapy
Source: Research Square preprint supplement (doi:10.21203/rs.3.rs-1664020/v1), 2022-06-01
Supplement: Supplementary file 1 [file 7c30c114b59cc8efd6ab7e7c.xls]

## Sheet: 乙肝+SPSS
性别	年龄	现正吸烟	现正饮酒	EVB1,GVB2	HGB下降3g以上	首次入院日期	是否存在分流	1小分流 2大分流（直径大于8mm为大分流）	分流类型	有无再出血1有0无	1年内再出血	1年后再出血	再出血日期	再出血时间	急性出血	复查	生存时间	time（3年）	time（5年）	time（month）	随访时间	胃镜治疗次数	组织胶总量	聚桂醇总量	平均每次胃镜组织胶量	平均每次胃镜聚桂醇量	首次组织胶剂量	首次聚桂醇剂量	是否第一次套扎	组织胶+硬化剂	组织胶	硬化剂	套扎+组织胶+硬化剂	套扎+组织胶	套扎+硬化剂	单独套扎	套扎	钛夹	末次随访时间	首次出院日期	次数	死亡	3年死亡	终点事件	联系电话	诊断	是否乙肝	病因（酒精性、胆汁性0）	肝癌
1	48	0	0		0	2008-10-24	1	2	脐静脉+食管旁	1	0	1	2009-12-18	420	是			36	60	111	3342	5	0	110	0	22	0	0	1	0	0	0	0	0	0	1	1（第一次胃镜）		2017-12-18	2008-11-21		0	0	2009.12入院后予乌苯美司辅助抗肿瘤，恩替卡韦抗病毒，螺内酯联合呋塞米利尿，复方甘草酸苷、苦参素抗炎保肝，还原型谷胱甘肽清除氧自由基，多烯磷脂酰胆碱稳定肝细胞膜等综合治疗；嘱患者适当增加蛋白质摄入，饮食补血，对症补钾。患者腹水合并严重低蛋白血症，予人血白蛋白12.5g对症治疗，改善低蛋白血症。后患者病情平稳。	69456621	1、肝炎肝硬化 活动性 失代偿期 乙型 食管静脉曲张（重度） 胃底静脉曲张（轻度） 低蛋白血症（24.8g/l) 腹水 脾大 脾功能亢进 2、十二指肠球部溃疡 3、幽门螺旋杆菌感染 4、食管静脉曲张破裂出血 失血性休克 失血性贫血	1	1	0
1	58	0	0		0	2008-11-23	0			0	0	0		3327				36	60	110	3327	1	0	0	0	0	0	0	1	0	0	0	0	0	0	1	1（第一次胃镜）		2018-01-02	2008-12-08		0	0	2008.12患者主因间断呕血、黑便30个月入院，30月以前患者无明显诱因出现黑便，1-2次/d，量约200g/d，一周后无明显诱因出现呕血，鲜血约500ml，至当地医院就诊，诊为“肝炎肝硬化，肝癌”，药物治疗后好转出院，后至北京空军总医院行伽马刀治疗肝脏占位，2年前，无明显诱因出现呕血，鲜血700ml，无黑便，无意识丧失，无腹痛、腹泻，无发热，至当地医院就诊，诊为肝炎肝硬化，给予贺普丁抗病毒治疗，后出现病毒变异，服用贺普丁+贺维力抗病毒治疗，复查腹部CT肝脏占位消失，为进一步行胃镜治疗，特来我院。入院后完善检查，胃镜示食道静脉曲张中度，胃底静脉曲张轻度，肝功正常，HBVDNA定量﹤500c/ml，彩超示肝硬化，肝右叶低回声，AFP2.1ng/ml，建议其行腹部CT检查，结合患者外院CT未见明显占位病灶，建议其定期复查CT。入院后行胃镜下套扎治疗，共10点，术后利复星抗感染，术后10余天…	13930412670	1、肝炎肝硬化 静止性 失代偿期 乙型	1	1	0
1	56	0	1		1	2008-12-14	1	1	脾肾分流		0	1	2010-09-27	652		是		36	60	109	3282	5	5	70	1	14	0	0	1	0	0	0	0	0	0	1	1（第一次胃镜）		2017-12-09	2009-01-08	2	0	0		13391506546	1、肝炎肝硬化 活动性 失代偿期 乙型 2、食道胃底静脉曲张 食道静脉曲张套扎术后 3、腹水 腹腔感染 4、脾大 脾功能亢进 5、胆囊炎、胆囊结石	1	1	0
2	50	0	0		0	2008-10-08	1	2	食管旁	0	0	0		3272	是			36	60	109	3272	1	1	0	1	0	1	0	1	0	0	0	0	1	0	0	1（第一次胃镜）		2017-09-23	2008-11-03		0	0		1352218827	肝炎肝硬化 活动性失代偿期 乙型 上消化道出血 腹水 腹腔感染 脾大 脾功能亢进 食道静脉硬化术后	1	1	0
1	37	0	0		0	2009-01-05	0			0	0	0		3284				36	60	109	3284	1	1	0	1	0	1	0	1	0	0	0	0	1	0	0	1（第一次胃镜）		2018-01-02	2009-01-23	2	0	0	09-01-23复查胃镜套扎环脱落，未见出血，陈京龙主任医师看病人指示患者目前治疗已结束，可出院，院外随诊。	69045536空号、13717948910	1、肝炎后肝硬化 活动性 失代偿期 乙型 2、腹水 3、食管胃底静脉套扎+硬化术后 4、低蛋白血症（25.3g/l）	1	1	0
1	55	0	0		0	2008-12-10	1	1	脐静脉	0	0	0		3264	是			36	60	108	3264	3	1	40	0.333333	13.3333	0.5	0	0	0	1	0	0	0	0	0			2017-11-17	2009-01-16	1	0	0	患者主因间断乏力35年余，呕血黑便8年，再发黑便2天。入院，入院后完善胃镜检查可见十二指肠溃疡伴出血，肠腔狭窄，给予口服止血药物对症治疗，同时给予静脉营养支持治疗，排空胃腔后复查胃镜：食管静脉曲张显露，胃底静脉曲张轻度，十二指肠球降占位性病变：恶性可能性大。腹部CT平扫+增强+门脉CT三维重建-B：1.腹部肠道手术术后改变；胆囊切除术后；壶腹区占位，对比2017-8-19腹部CT，较前略增大；胆总管扩张。请结合临床。2.肝硬化；脾切断流、食管下段横断吻合术后改变、少许腹腔积液；3.肝脏多发一过性强化结节灶，考虑灌注异常可能大，对比2017-8-19腹部CT，大致同前。4.腰椎术后。给予保肝、抑酸等对症治疗后好转。	13511083198、13811018501	1、肝炎肝硬化 活动性 失代偿期 乙型 2、门脉高压症 3 食道胃底静脉曲张破裂出血 4 腹水、腹腔感染 5、上消化道出血 6、室性期前收缩 7、腰椎手术后状态 8、门脉高压性胃病 9、重度贫血 10、右下肺炎 12上呼吸道感染 13失眠	1	1	0
2	47	0	0		1	2008-09-25	1	2	脐静脉+脾髂静脉	1	1	0	2008-12-11	77	是			36	60	108	3263	2	1	10	0.5	5	1	0	1	0	0	0	0	1	0	0	1（第一次胃镜）		2017-09-01	2008-11-28		0	0		15901355385	1、上消化道出血 2、食道胃底曲张静脉破裂出血 3、重度贫血 4、肝炎肝硬化 活动性 失代偿期 乙型 5、脾机能(功能)亢进 6、低蛋白血症 7、腹水 8、肠炎 9.门脉高压性胃病 10.胆囊结石 11.肝囊肿	1	1	0
1	43	0	0		0	2009-01-19	0			0	0	0		3251		一级预防		36	60	108	3251	1	0	0	0	0	0	0	1	0	0	0	0	0	0	1	1（第一次胃镜）		2017-12-14	2009-02-01	1	0	0		13601263158	1、肝炎肝硬化 活动性 失代偿期 乙型 2、食道静脉曲张中度 套扎术后 3、胃溃疡H1 慢性浅表性胃炎 4、高血压I 5、2型糖尿病 6、低钾血症 7、窦性心动过缓	1	1	0
2	46	0	0		0	2008-12-07	0			1	0	1	2015-05-26	2361	是			36	60	108	3267	5	3.5	50	0.7	10	0.5	0	1	0	0	0	0	1	0	0	1（第一次胃镜）		2017-11-17	2008-12-25		0	0		69736036	1、肝炎肝硬化 活动性 失代偿期 乙型 2、上消化道出血 3、腹水 4、腹腔感染 5、脾功能亢进 6、食道重度曲张静脉套扎术后 7、贲门静脉曲张中度 8、右附件囊肿 9、子宫肌瘤	1	1	0
1	46	1	1		0	2009-02-11	0			1	0	1	2014-02-06	1821		一级预防		36	60	107	3226	10	11.5	210	1.15	21	0.5	0	1	0	0	0	0	1	0	0	1（第一次胃镜）		2017-12-12	2009-03-05	2	0	0		13901007411、13718095575	1、肝炎后肝硬化 活动性 失代偿期 乙型 食道胃底静脉曲张治疗后 2、腹腔积液 3、高血压病 4、2型糖尿病	1	1	0
1	43	0	0		1	2009-02-23	0			0	0	0		3237				36	60	107	3237	1	0.5	20	0.5	20	0.5	20	0	1	0	0	0	0	0	0			2018-01-04	2009-03-23	1	0	0	2009.3出院。出院后行肝移植，现病情稳定	13701335257、13910082429	1、肝炎肝硬化 活动性 失代偿期 乙型 2、上消化道出血 3、腹腔积液 4、腹腔感染 5、经皮经肝胃冠状静脉栓塞术 6、脾断流术后 7、经颈静脉肝内门腔分流术后 8、门脉左支栓塞	1	1	0
1	36	0	0	1	0	2009-04-07	1	1	脐静脉	1	0	1	2016-09-11	2714		一级预防		36	60	106	3192	2	0.5	30	0.25	15	0.5	0	1	0	0	0	0	1	0	0	1（第一次胃镜）		2018-01-02	2009-04-22	2	0	0	2010.7门诊，现病情平稳	13521285510	1、肝炎肝硬化 活动型 失代偿期 乙型 2、食道、胃底静脉曲张组织胶+套扎治疗术后 3、脾功能亢进 4、门脉高压性胃病 5、幽门螺旋杆菌感染	1	1	0
1	37	1	0		0	2008-12-05	1	2	食管旁+脐静脉+脾肾分流	0	0	0		3207	是			36	60	106	3207	1	0.5	0	0.5	0	0.5	0	1	0	0	0	0	1	0	0	1（第一次胃镜）		2017-09-16	2008-12-25		0	0		13651020545	1、急性上消化道出血 2、肝炎肝硬化 活动性 失代偿期 乙型 3、食道胃底静脉曲张破裂出血 4、腹水 5、低蛋白血症 6、脾大 7、脾功能亢进 8、慢性浅表性胃炎	1	1	0
1	29	0	0		0	2009-04-01	1	1	脐静脉	0	0	0		3198		是		36	60	106	3198	1	0.5	0	0.5	0	0.5	0	0	0	1	0	0	0	0	0			2018-01-02	2009-04-30	1	0	0	2012.10门诊	13051757676、13161888118	1、肝炎肝硬化 活动性 失代偿期 乙型 2、贫血 3、腹水 4、腹腔感染 5、低蛋白血症 6、食管胃底静脉曲张轻度 胃底曲张静脉组织胶治疗 7、皮炎 8、右眼术后	1	1	0
1	35	0	0		0	2009-03-04	0			0	0	0		3193	是			36	60	106	3193	1	0.5	10	0.5	10	0.5	10	0	1	0	0	0	0	0	0			2017-11-30	2009-03-10	1	0	0		13911088319、13911225828	1、肝炎肝硬化 活动性 失代偿期 乙型 2、上消化道出血 3、食道胃底曲张静脉硬化治疗术后	1	1	0
1	39	0	0		0	2008-12-30	0			0	0	0		3190		是		36	60	106	3190	1	1	0	1	0	1	0	1	0	0	0	0	1	0	0	1（第一次胃镜）		2017-09-24	2009-01-22	2	0	0		13717781801	1、肝炎肝硬化 活动性 失代偿期 乙型 2、腹腔积液 3、食管静脉曲张破裂出血 4、胃底静脉曲张破裂出血 5、右侧胸腔积液 6、脾大 7、脾机能(功能)亢进 8、门脉高压性胃病 9、低蛋白血症 10、贫血 中度 11、营养不良性贫血 12、失血性贫血 13、上呼吸道感染 14、低钾血症	1	1	0
2	65	0	0		0	2009-03-23	0			0	0	0		3208				36	60	106	3208	1	1	0	1	0	1	0	1	0	0	0	0	1	0	0	1（第一次胃镜）		2018-01-03	2009-04-07	2	0	0	2009.3.23谢雯主任医师查房，指示继续阿德福韦酯+拉米夫定抗病毒治疗；食道、胃底静脉重度曲张，给予胃镜下人体组织胶+套扎治疗预防消化道出血，胃镜下治疗后观察10天，患者无呕血、黑便等不适。现患者神志清，精神、食欲可，无发热，无腹痛、腹胀等不适，患者家族中有肝癌史，建议定期腹部CT检查，患者拒绝，并要求今日出院，拒绝复查肝功，拒绝带口服药。请示赵红主治医师意见，同意患者出院，嘱回当地医院继续治疗。	13691411857无法接通、87736261	1、肝炎肝硬化 活动型 失代偿期 乙型 2、食道、胃底静脉重度曲张人体组织胶+套扎治疗术后 3、低蛋白血症 4、脾机能(功能)亢进	1	1	0
1	38	0	1		1	2009-03-20	1	2	脾肾分流	0	0	0		3172	是			36	60	105	3172	1	0.5	10	0.5	10	0.5	10	1	0	0	0	1	0	0	0	1（第一次胃镜）		2017-11-25	2009-03-31	2	0	0		13910326137、13671299656	1、肝炎肝硬化 活动性 失代偿期 乙型 上消化道出血 腹水 低蛋白血症ALB27g/L 2、食道胃底静脉曲张 3、门脉高压性胃病	1	1	0
2	49	0	0		0	2009-03-14	0			0	0	0		3173		一级预防		36	60	105	3173	1	0	20	0	20	0	20	0	0	0	1	0	0	0	0			2017-11-20	2009-04-01	1	0	0	患者今日一般情况好，食欲、睡眠好，大便正常，小便未见明显异常，昨日24小时尿量850ml。查体：生命体征平稳，心肺无明显异常，腹围叫前缩小，腹部无压痛、反跳痛，移动性浊音可疑，双下肢无水肿。患者病情平稳，今日要求出院，李明慧主任医师指示，带药出院。	15101109429	1、肝炎后肝硬化 活动性 失代偿期 乙、丁型 2、脾功能亢进 3、腹水 4、腹腔感染 5、胸水（左侧） 6、胸腔感染 7、食道静脉曲张（中度）硬化治疗术后 8、门脉高压性胃病 9、幽门螺杆菌感染	1	1	0
1	21	0	0		1	2009-06-05	0			0	0	0		3126	是			36	60	104	3126	3	0.5	20	0.166667	6.66667	0.5	0	1	0	0	0	0	1	0	0	1（第一次胃镜）		2017-12-26	2009-06-15	2	0	0	2014.5门诊谢尧	13611204353无人接听、13701211999	1、肝炎肝硬化 活动性 失代偿期 乙型 2、胃底静脉曲张破裂出血 3、食道胃底静脉曲张套扎及组织胶治疗后 4、腹水 5、腹腔感染 6、脾机能(功能)亢进 7、低蛋白血症 8、急性失血性贫血	1	1	0
1	36	0	0		0	2009-01-07	1	1	脐静脉	1	0	1	2011-10-15	1011		是		36	60	103	3115	5	2.5	120	0.5	24	0	0	1	0	0	0	0	0	0	1	2（第一次胃镜）		2017-07-19	2009-02-05	2	0	0		62817920、13601248812	1、肝炎肝硬化 活动性 失代偿期 乙型	1	1	0
1	52	1	0		0	2008-12-18	1	1	脐静脉	1	0	1	2009-12-21	368	是			36	60	103	3103	2	1.5	40	0.75	20	0.5	0	1	0	0	0	0	1	0	0	1（第一次胃镜）		2017-06-17	2008-12-31		0	0		0312-2767096、15933325927	1.肝炎肝硬化 活动性 失代偿期 乙型 食道静脉曲张破裂出血 脾功能亢进 腹水 2.肝内占位 原发性肝癌不除外	1	1	0
1	61	0	0		0	2008-12-28	1	1	食管旁+脐静脉	0	0	0		3116		一级预防		36	60	103	3116	4	2	70	0.5	17.5	0.5	0	1	0	0	0	0	1	0	0	1（第一次胃镜）		2017-07-10	2009-03-06	6	0	0		13041038074	1、肝炎肝硬化 活动性 失代偿期 乙型 2、腹水 3、腹腔感染 4、低蛋白血症 5、食道贲门曲张静脉套扎硬化术后 6、十二指肠球溃疡	1	1	0
1	40	1	1		1	2009-02-12	1	2	食管旁+脾肾	1	0	1	2010-06-12	485	是			36	60	102	3075	4	1	90	0.25	22.5	0	10	1	0	0	0	0	0	1	0	1（第一次胃镜）		2017-07-15	2009-03-03	3	0	0		13601203289	1、肝炎肝硬化 活动性 失代偿期 乙型 2、上消化道出血 3、出血性休克 4、腹水 5、腹腔感染 6、食道胃底曲张静脉套扎硬化术后	1	1	0
1	55	0	0		1	2009-09-07	1	1	脐静脉	1	1	0	2010-04-15	220	是			36	60	100	3026	2	0.5	20	0.25	10	0.5	0	1	0	0	0	0	1	0	0	1（第一次胃镜）		2017-12-20	2009-09-17	2	0	0		13671126751	1、肝炎肝硬化 活动性 失代偿期 乙型 2、食道胃底静脉曲张破裂出血组织胶+套扎治疗后 3、失血性贫血 4、失血性休克 5、低蛋白血症 6、腹水 7、脾功能亢进 8、低钾血症 9、胆囊炎 10、高血压病 2级 极高危 11、2型糖尿病 12、肝脏结节性质不明：恶性肿瘤不能除外	1	1	0
2	53	0	0		0	2009-09-04	0			1	1	0	2010-04-03	211	是			36	60	100	3023	1	0.5	40	0.5	40	0.5	40	0	1	0	0	0	0	0	0			2017-12-14	2009-09-22	1	0	0		13661087086	1、肝炎肝硬化 失代偿期 乙型 2、上消化道出血 3、腹水 4、腹腔感染 5、肝性脑病	1	1	0
1	41	1	1		0	2009-08-23	1	2	食管旁+脾肾	0	0	0		2967				36	60	98	2967	4	3	80	0.75	20	0.5	10	0	1	0	0	0	0	0	0			2017-10-07	2009-09-01	1	0	0		15910203093	1、肝炎肝硬化 活动性 失代偿期 乙型 2、食管胃底静脉曲张破裂出血 组织胶及硬化剂注射治疗术后 3、失血性贫血 4、脾机能(功能)亢进 5、胃息肉 6、幽门螺杆菌感染 7、2型糖尿病	1	1	0
1	49	1	1		0	2009-05-31	1	2	食管旁	1	0	1	2012-01-29	973		一级预防		36	60	97	2918	5	3.5	110	0.7	22	0.5	0	1	0	0	0	0	1	0	0	1（第一次胃镜）		2017-05-27	2009-06-24	2	0	0		691966036、13691549491	1、肝炎肝硬化 活动型 失代偿期 乙型 2、食道胃底静脉曲张套扎+组织胶治疗后 3、腹水 4、低蛋白血症 5、脾机能(功能)亢进 6、慢性浅表性胃炎 7、幽门螺旋杆菌感染 8、腰椎间盘突出 9、胆囊结石 10、胆囊炎	1	1	0
1	59	0	0		1	2009-11-09	0			1	0	1	2012-02-15	828	是			36	60	96	2883	5	5	90	1	18	1.5	10	1	0	0	0	1	0	0	0	1（第一次胃镜）		2017-10-01	2009-11-20	2	0	0		13716322043	1、肝炎肝硬化 活动性 失代偿期 乙型 2、上消化道出血 出血性贫血 3、腹水 4、腹腔感染 5、2型糖尿病 6、高血压病3级 7、双肺继发性结核	1	1	0
1	48	1	0		0	2009-08-10	1	1	脾肾	1	1	0	2009-11-13	95		一级预防		36	60	95	2858	5	1	120	0.2	24	0.5	20	0	1	0	0	0	0	0	0			2017-06-07	2009-08-26	1	0	0		13910871840	1、肝炎后肝硬化活动性失代偿期乙型 2、腹水 3、低蛋白血症（29g/L）4、脾功能亢进	1	1	0
2	43	0	0		0	2010-01-20	1	2	食管旁+脐静脉	0	0	0		2870		一级预防		36	60	95	2870	2	3	60	1.5	30	1	20	0	1	0	0	0	0	0	0			2017-11-29	2010-02-02	1	0	0		13716015859	1、肝炎肝硬化 活动性 失代偿期 乙型 2、食道胃底静脉曲张 3、腹水 4、慢性浅表性胃炎 5、脾切除术后 6、便秘 7、胆囊结石 胆总管结石	1	1	0
2	53	0	0		0	2009-06-16	1	2	脐静脉	0	0	0		2824		一级预防		36	60	94	2824	1	0.5	0	0.5	0	0.5	0	1	0	0	0	0	1	0	0	1（第一次胃镜）		2017-03-10	2009-06-26	2	0	0		13973173364、13811851036	1、肝炎后肝硬化 活动性 失代偿期 乙型 2、脾功能亢进 3、食道静脉中度曲张套扎治疗后 4、胃底静脉轻度曲张组织胶治疗后	1	1	0
2	49	0	0		0	2010-01-16	1	2	脾肾	0	0	0		2830		一级预防		36	60	94	2830	2	0	60	0	30	0	20	0	0	0	1	0	0	0	0			2017-10-16	2010-02-02	1	0	0		13811410208	肝炎肝硬化 代偿期 活动性 乙型 食道胃底静脉曲张，硬化治疗后 腹水 胸水 低蛋白血症 脾功能亢进 慢性浅表性胃炎 高血压病，2级，高危 子宫、附件切除术后 阑尾切除术后	1	1	0
2	63	0	0		0	2009-10-26	1	2	脾肾分流	0	0	0		2802		一级预防		36	60	93	2802	2	0.5	10	0.25	5	0.5	0	1	0	0	0	0	1	0	0	1（第一次胃镜）		2017-06-28	2009-11-23	3	0	0		84791730、13910080172	1、肝炎肝硬化 活动性 失代偿期 乙型 2、腹水 3、食管静脉曲张重度 4、胃底静脉曲张轻度 5、脾机能亢进 6、低蛋白血症 7、低钾血症	1	1	0
1	46	0	1		1	2010-01-10	0			0	0	0		2802	是			36	60	93	2802	1	1	10	1	10	1	10	0	1	0	0	0	0	0	0			2017-09-12	2010-01-21	1	0	0		61423695、13121016761	肝炎肝硬化 活动性 失代偿期 乙型，上消化道出血，胃底曲张静脉破裂，硬化治疗后，失血性贫血，脾功能亢进，腹水，腹腔感染，低蛋白血症	1	1	0
1	44	1	1		1	2010-05-26	0			0	0	0		2778				36	60	92	2778	1	0	0	0	0	0	0	1	0	0	0	0	0	0	1	1（第一次胃镜）		2018-01-02	2010-06-11	1	0	0	2010.6电子胃镜示：食道静脉曲张重度；门脉高压性胃病；慢性浅表性胃炎，HP（+）。腹部彩超示：肝弥漫性病变 胆囊壁毛糙 脾大 门脉高压不除外。于06、01在电子胃镜下行食管静脉套扎术。入院后给予保肝、调节免疫、抗病毒及纠正低蛋白血症等对症支持治疗。	13313398115	1、肝炎肝硬化 活动性 失代偿期 乙型 2、脾大 脾功能亢进 3、食管静脉套扎术后	1	1	0
1	55	1	1		0	2010-06-11	0			0	0	0		2762				36	60	92	2762	1	1	0	1	0	1	0	1	0	0	0	0	1	0	0	1（第一次胃镜）		2018-01-02	2010-06-30	2	0	0	2011.6患者主因发现HBsAg阳性16年，反复呕血黑便1年。入院查腹部CT提示：1.肝硬化、脾大、少量腹水；食道下段及胃底静脉曲张。2.脾脏局部梗塞灶3.胆囊炎。4.肝门区及肠系膜上可见多个小淋巴结影，请结合临床。住院期间，患者血色素最低至48g/l，给予输注红细胞2u，患者病情好转，要求出院，嘱定期监测心率。此后未出血过	13910728512空号、13050173041	1、肝炎肝硬化 活动型 失代偿期 乙型 2、腹水 3、腹腔感染 4、上消化道出血 5、食道静脉曲张套扎治疗 6、胃底曲张静脉组织胶治疗 7、脾内梗塞灶可能性大	1	1	0
2	46	0	0		1	2010-03-05	0			1	0	1	2013-01-05	1037	是			36	60	92	2785	3	1.5	80	0.5	26.6667	0.5	30	0	1	0	0	0	0	0	0			2017-10-19	2010-04-06	1	0	0		13994394050	1、肝炎肝硬化 失代偿期 活动性 乙型 2、腹水 3、腹腔感染 4、上消化道出血 胃底静脉曲张硬化剂治疗后	1	1	0
1	30	1	0		0	2009-12-18	1	2	食管旁+脾肾	0	0	0		2751		一级预防		36	60	91	2751	1	0.5	40	0.5	40	0.5	40	0	1	0	0	0	0	0	0			2017-06-30	2010-01-18	1	0	0		13264026444、13910933082	1、肝炎肝硬化 活动性 失代偿期 乙型 2、腹水 3、腹腔感染	1	1	0
1	32	0	0		0	2010-05-05	1	2	脾肾	0	0	0		2753		是		36	60	91	2753	2	2.5	70	1.25	35	0.5	30	0	1	0	0	0	0	0	0			2017-11-17	2010-05-14	1	0	0		13651079238	肝炎肝硬化 活动性 失代偿期 乙型 脾功能亢进 食道胃底静脉曲张中度硬化治疗后 慢性浅表性胃炎 幽门螺杆菌感染	1	1	0
1	54	0	1		0	2009-09-26	1	1	食管旁	1	1	0	2010-03-28	183	是			36	60	91	2760	5	5.5	80	1.1	16	2	0	0	0	1	0	0	0	0	0	1		2017-04-17	2009-10-27	1	0	0		15901405042、13683362599	1、门脉高压症 食道胃底曲张静脉破裂出血 食道胃底静脉重度曲张 脾大 脾功能亢进 腹水 低蛋白血症（27.1g/L） 2、肝炎肝硬化活动性失代偿期乙型	1	1	0
2	62	0	0		1	2010-01-15	1	2	胃肾（胃腔外）	1	1	0	2010-09-22	250	是			36	60	91	2735	6	4.5	130	0.75	21.6667	1.5	20	0	1	0	0	0	0	0	0			2017-07-12	2010-02-03	1	0	0		64381180、13311390519	1、肝炎肝硬化 活动性 失代偿期 乙型 2、腹水 3、腹腔感染 4、肝性脑病 5、脾功能亢进 6、低蛋白血症 7、上消化道出血 8、重度贫血 9、肺部感染	1	1	0
1	63	0	0		1	2009-11-19	0			1	0	1	2011-03-24	490	是			36	60	91	2745	8	3.5	160	0.4375	20	0	10	1	0	0	0	0	0	1	0	1（第一次胃镜）		2017-05-26	2009-12-03	2	0	0		13651054375	1、肝炎肝硬化 活动性 失代偿期 乙型 2、食道静脉曲张破裂出血 食道静脉曲张套扎及硬化剂治疗后 3、贫血 4、脾功能亢进 5、腹水 6、低白蛋白血症（ALB29.4g/l）7、2型糖尿病	1	1	0
1	50	1	1		0	2009-12-30	1	1	脐静脉	1	0	1	2012-03-23	814	是			36	60	90	2722	8	6	150	0.75	18.75	1	0	0	0	1	0	0	0	0	0			2017-06-13	2010-01-08	1	0	0		13641355449、61783225	1、肝炎肝硬化 活动性 失代偿期 乙型 2、消化道出血 3、腹水 4、脾功能亢进 5十二指肠溃疡 6、慢性支气管炎	1	1	0
1	66	0	0		0	2008-12-03	1	2	门脉-直肠	1	0	1	2010-12-07	734	是			36	60	90	2715	7	5.5	80	0.785714	11.4286	0.5	0	1	0	0	0	0	1	0	0	1（第一次胃镜）		2016-05-10	2008-12-17		0	0		已故62848683、13910091903	1、肝炎肝硬化 活动性 失代偿期 乙型 2、上消化道出血 3、胃底静脉曲张破裂出血 组织胶硬化+套扎治疗4、腹水5、精索鞘膜积液	1	1	0
1	47	1	0		0	2010-07-23	1	2	食管旁	0	0	0		2720		一级预防		36	60	90	2720	4	0	160	0	40	0	50	0	0	0	1	0	0	0	0			2018-01-02	2010-08-10	1	0	0	2015.7电子胃镜检查:食管静脉曲张轻度，慢性非萎缩性胃炎，建议1年后复查胃镜。入院后经保肝、退黄等治疗后患者胆红素较前下降，PTA较前升高，血小板较前升高，病情稳定，经请示上级医师后予出院。此后因肝病反复就诊于302医院，现病情平稳	15164786777无人接听、15047889653	1、肝炎肝硬化活动性失代偿期乙型 食管静脉曲张重度 腹水 脾大 脾功能亢进 2、胃窦溃疡 十二指肠球部糜烂	1	1	0
1	53	1	0		1	2010-01-09	0			1	0	1	2011-11-26	686	是			36	60	90	2713	6	4.5	160	0.75	26.6667	0.5	10	1	0	0	0	1	0	0	0	1（第一次胃镜）		2017-06-14	2010-01-29	2	0	0		13720017158、13910606932	1、肝炎肝硬化，失代偿期，活动性，乙型 2、上消化道出血 3、腹水 4、腹腔感染 5、慢性浅表性胃炎	1	1	0
1	63	0	0		0	2010-08-09	1	2	食管旁	0	0	0		2684		是		36	60	89	2684	1	1	50	1	50	1	50	0	1	0	0	0	0	0	0			2017-12-14	2010-08-18	1	0	0	患者目前上消化道出血暂时止住、感染较前明显好转，病情好转，但仍有低蛋白血症、低钾血症、抗生素疗程不足，建议继续住院治疗，患者及家属仍要求今日出院，劝说无效，予办理今日出院。	62379498、81779329	1、肝炎肝硬化 活动性 失代偿期 乙型 2、腹水 3、低白蛋白血症 4、2型糖尿病 5、肺大疱	1	1	0
1	66	1	0		0	2010-02-02	0			1	0	1	2014-01-08	1436		一级预防		36	60	89	2676	4	4	170	1	42.5	1	60	0	1	0	0	0	0	0	0			2017-06-01	2010-02-11	1	0	0		87310773、84285986	肝炎肝硬化活动性失代偿期乙型 腹水 腹腔感染 低蛋白血症（27.4g/L） 食道胃底静脉曲张内镜治疗后 门脉栓塞 胆囊炎 胆囊结石 慢性浅表性胃炎 幽门螺杆菌感染 肺部感染	1	1	0
1	45	0	1		1	2010-08-31	0			0	0	0		2681				36	60	89	2681	1	2	70	2	70	2	70	0	1	0	0	0	0	0	0			2018-01-02	2010-09-14	1	0	0	2010.9患者为进一步诊治逐来我院。患者入院后完善相关检查，给予保肝止血治疗，并予2010年9月7日行胃镜下硬化剂止血治疗，术后安返病房，目前患者病情平稳，嘱其出院。此后未出血过	13933788111	1、肝炎肝硬化 活动性 失代偿期 乙型 2、门静脉高压症 3、上消化道出血 4、脾大 5、腹水 6、糖尿病	1	1	0
1	43	0	1		1	2010-02-22	1	2	脾肾	1	0	1	2011-11-25	641	是			36	60	88	2650	10	11.5	200	1.15	20	2	0	0	0	1	0	0	0	0	0			2017-05-26	2010-03-09	1	0	0		13651162328、13522672756	1、肝炎肝硬化活动性失代偿期乙型 2、上消化道出血 3、胃冠状静脉栓塞术 4、胃底静脉曲张硬化剂治疗 5、腹水6、腹腔感染	1	1	0
1	51	0	0		0	2009-12-14	1	1	脐静脉	1	0	1	2010-12-24	375	是			36	60	88	2661	6	4.5	110	0.75	18.3333	1	0	1	0	0	0	0	1	0	0	1（第一次胃镜）		2017-03-28	2009-12-30	3	0	0	患者一般情况大致同前，未诉特殊不适，饮食睡眠尚可，二便正常。24小时入量2105ml，尿量2100ml。查体：全身皮肤黏膜颜色正常，肝掌阳性，蜘蛛痣阳性，全身浅表淋巴结未及异常肿大。双肺呼吸音清，未闻及干湿啰音及胸膜摩擦音。心律齐，各瓣膜听诊区未闻及病理性杂音，腹部平坦，全腹无压痛及反跳痛，移动性浊音阴性。双下肢无水肿，踝阵挛阴性，扑翼样震颤阴性。	13835494456、13403545700	1、肝炎后肝硬化 活动性失代偿期 乙型 2、食道胃底静脉曲张破裂出血 3、套扎、组织胶及硬化剂治疗后 4、腹水 5、腹腔感染 6、胸水 7、脾功能亢进 8、2型糖尿病 9、慢性胆囊炎	1	1	0
1	33	0	0		0	2010-05-26	1	2	脾肾	0	0	0		2659		一级预防		36	60	88	2659	1	1.5	50	1.5	50	1.5	50	0	1	0	0	0	0	0	0			2017-09-05	2010-06-10	1	0	0		13910197644、15801490231	1、肝炎肝硬化 失代偿期 活动性 乙型 2、腹水 3、食道胃底静脉曲张硬化剂治疗后	1	1	0
1	59	0	0		0	2010-02-18	0			1	0	1	2011-04-04	410	是			36	60	88	2655	5	2.5	120	0.5	24	1	40	0	1	0	0	0	0	0	0	1		2017-05-27	2010-03-03	1	0	0		1.38112e+21	1肝炎肝硬化活动性失代偿期乙型 2、上消化道出血3、食道胃底静脉曲张硬化治疗术后4、腹水 5、脾机能亢进6、胆囊结石 7、贫血（中度）8、肾囊肿	1	1	0
2	64	0	0		0	2010-09-25	0			0	0	0		2646		一级预防		36	60	88	2646	1	0	50	0	50	0	50	1	0	0	0	0	0	1	0	1（第一次胃镜）		2017-12-23	2010-10-08	2	0	0	2013.10门诊	81736631、13520557722	1、肝炎肝硬化 活动性 失代偿期 乙型 2、食道胃底静脉曲张套扎术后 3、腹水	1	1	0
2	55	0	0		0	2010-10-12	0			1	1	0	2011-08-01	293	是			36	60	88	2641	3	2.5	80	0.833333	26.6667	1	40	0	1	0	0	0	0	0	0			2018-01-04	2010-10-20	1	0	0	2014.8门诊	13974136001、15811009448	1、上消化道出血 2、食道胃底静脉曲张破裂出血 3、 4、十二指肠球溃疡（H1期）伴糜烂 5、肝炎肝硬化活动性失代偿期乙型 6、脾大 7、脾功能亢进 8、胆囊结石	1	1	0
1	45	1	1		1	2010-03-24	1	2	食管旁+脐静脉+脾肾分流	1	0	1	2011-05-28	430		一级预防		36	60	87	2639	13	11	300	0.846154	23.0769	0	0	1	0	0	0	0	0	0	1	1（第一次胃镜）		2017-06-14	2010-04-20	2	0	0		15010040179	1、肝炎肝硬化 活动性 失代偿期 乙型 2、腹水 3、脾大 脾功能亢进 4、食道胃底静脉曲张 5、慢性浅表性胃炎	1	1	0
1	58	0	0		0	2010-10-10	0			0	0	0		2631				36	60	87	2631	2	1	70	0.5	35	1	40	0	1	0	0	0	0	0	0			2017-12-23	2010-11-12	2	0	0	2010.10.10门诊，仅一次记录	13910928682	1、肝炎肝硬化活动性失代偿期乙型 2、腹水 3、腹腔感染 4、食道静脉曲张重度 5、胃底静脉曲张轻度 6、脾功能亢进 7、慢性浅表性胃炎 8、贫血（中度） 9、2型糖尿病 10、胆囊结石	1	1	0
1	51	0	0		0	2010-10-06	0			0	0	0		2625	是			36	60	87	2625	1	0.5	30	0.5	30	0.5	30	0	1	0	0	0	0	0	0			2017-12-13	2010-10-19	1	0	0		13671073779	1、肝炎肝硬化 静止性 失代偿期 乙型 2、食道胃底静脉重轻度曲张 3、门脉高压性胃病 4、脾大 脾功能亢进 5、十二指肠球溃疡 6、胃底息肉 7、溃疡性结肠炎	1	1	0
1	33	0	0		1	2010-08-28	0			0	0	0		2559	是			36	60	85	2559	1	1.5	0	1.5	0	1.5	0	0	0	1	0	0	0	0	0			2017-08-30	2010-09-01	1	0	0		13126570230、13051806504	、肝炎肝硬化 活动性 失代偿期 乙型 2、食道胃底静脉曲张破裂出血 3、组织胶注射治疗术后 4、失血性贫血（重度） 5、腹水 6、腹腔感染 7、低蛋白血症 8、脾功能亢进 9、双侧胸腔积液 10、胆囊切除术后 11、脾血管瘤	1	1	0
1	47	0	0		0	2010-12-20	0			0	0	0		2560				36	60	85	2560	1	1.5	20	1.5	20	1.5	20	0	1	0	0	0	0	0	0			2017-12-23	2010-12-29	1	0	0	2011.1门诊	13643295861	1、肝炎肝硬化活动性失代偿期乙型 2、上消化道出血 3、食道胃底静脉中度曲张 4、内镜下组织胶+聚桂醇治疗术后	1	1	0
1	36	0	0		0	2010-11-23	0			1	1	0	2011-03-08	105	是			36	60	85	2575	2	3	70	1.5	35	1	40	0	1	0	0	0	0	0	0			2017-12-11	2010-12-02	1	0	0		69594926	肝炎肝硬化 活动性 失代偿期 乙型、腹水、腹腔感染、食道静脉曲张重度、胃底静脉曲张轻度	1	1	0
2	57	0	0		0	2010-11-03	0			0	0	0		2576		一级预防		36	60	85	2576	1	0	0	0	0	0	0	1	0	0	0	0	0	0	1	1（第一次胃镜）		2017-11-22	2010-11-09	1	0	0	门诊	13331025969	1、肝炎肝硬化 活动性 失代偿期 乙型	1	1	0
2	44	0	0		0	2010-12-28	0			1	1	0	2011-04-20	113	是			36	60	85	2552	1	1	30	1	30	1	30	1	0	0	0	1	0	0	0	1（第一次胃镜）		2017-12-23	2011-01-12	1	0	0	2012.8门诊普外科	15010022367	1、肝炎肝硬化 活动性 失代偿期 乙型 2、上消化道出血 3、低蛋白血症 4、食道胃底静脉曲张 5、脾大 6、腹水	1	1	0
1	44	0	9		0	2009-03-09	1	2	脾肾	1	0	1	2013-11-26	1723		是		36	60	84	2550	6	2.5	120	0.416667	20	0.5	0	1	0	0	0	0	1	0	0	1（第一次胃镜）		2016-03-02	2009-03-23	2	0	0		15053467203	1、肝炎肝硬化 活动性 失代偿期 乙型 食管胃底静脉曲张 脾大、脾功能亢进	1	1	0
1	34	1	1		1	2011-01-30	1	1	脾肾	0	0	0		2529				36	60	84	2529	1	1	10	1	10	1	10	0	1	0	0	0	0	0	0			2018-01-02	2011-02-24	1	0	0	2011.4.18门诊闫杰，此后未出过血，病情稳定	13366606690 、13681342759	1、肝炎肝硬化 活动性 失代偿期 乙型 2、食道胃底静脉重度曲张 3、贲门静脉曲张破裂出血后 4、组织胶+聚桂醇注射治疗后 5、失血性贫血（中度） 6、腹水 7、腹腔感染 8、低蛋白血症 9、脾功能亢进 10、TIPS术后 11、DSA下胃冠状静脉栓塞术后 12、高钾血症 13、尖锐湿疣	1	1	0
1	57	0	0		1	2009-11-22	1	2	食管旁	0	0	0		2535	是			36	60	84	2535	2	1.5	50	0.75	25	0.5	30	0	1	0	0	0	0	0	0			2016-10-31	2009-12-07	2	0	0		010-52105213、13521358170	1、肝炎肝硬化 活动性 失代偿期 乙型 食管静脉曲张重度并破裂出血 胃底静脉曲张中度 脾大 脾功能亢进 低蛋白血症（30.8g/L） 腹水 右侧胸腔少量积液 2、胆囊结石	1	1	0
2	62	0	0		0	2010-05-13	0			1	0	1	2012-04-17	705		一级预防		36	60	84	2538	11	9	190	0.818182	17.2727	0	0	1	0	0	0	0	0	0	1	1（第一次胃镜）		2017-04-24	2010-06-04	1	0	0		13831693568、15100667699	1、肝炎后肝硬化 活动性 失代偿期 乙型 2、腹水 3、腹腔感染 4 食道静脉套扎术后 5 慢性浅表性胃炎	1	1	0
1	49	0	0		0	2010-10-28	1	2	脐静脉	0	0	0		2495		一级预防		36	60	83	2495	2	0	60	0	30	0	40	0	0	0	1	0	0	0	0			2017-08-27	2010-11-22	2	0	0		13699104015 13552760379	1、乙肝肝硬化 失代偿期 活动性 乙型 腹水 腹腔感染 食道、胃底静脉曲张中度（红色征阳性）2、幽门螺旋杆菌感染 3、糜烂性胃炎 4、食道溃疡	1	1	0
1	41	0	0		0	2009-12-14	1	1	脐静脉	0	0	0		2506	是			36	60	83	2506	4	2	70	0.5	17.5	0	20	0	0	0	1	0	0	0	0			2016-10-24	2010-01-06	1	0	0		13681072823、13683195283	1、肝炎肝硬化 活动性 失代偿期 乙型 食道静脉曲张破裂出血 腹水 脾大 脾机能(功能)亢进 脾静脉部分栓塞 失血性贫血 门脉高压性胃病 2、上呼吸道感染 3、右肾多发小囊肿 4、慢性浅表性胃炎	1	1	0
2	53	0	0		0	2010-07-02	1	2	食管旁	0	0	0		2513		一级预防		36	60	83	2513	5	2.5	100	0.5	20	1	40	0	1	0	0	0	0	0	0			2017-05-19	2010-08-13	3	0	0		13910085793	1、肝炎肝硬化 活动性 失代偿期 乙型 2、高血压3级 高危组 3、银屑病 4、脾大5、食管下段、胃底小弯侧静脉曲张6、腹水7、门静脉内栓塞8、胆石症9、慢性浅表性胃炎10、胃体息肉11、低蛋白12、低血钾	1	1	0
2	57	0	0		0	2010-10-12	1	1	脐静脉	1	1	0	2011-04-29	199	是			36	60	83	2519	5	2	160	0.4	32	0.5	40	0	1	0	0	0	0	0	0			2017-09-04	2010-11-10	2	0	0		13901129638、13901129638	1、肝炎肝硬化 活动性 失代偿期 乙型 2、上消化道出血 3、脾大 4、脾功能亢进 5、腹水 6、腹腔感染 7、低蛋白血症 8、白细胞减少症 9、食道胃底静脉曲张 10、食道排胶溃疡 11、2型糖尿病	1	1	0
1	41	0	0		0	2011-01-24	0			0	0	0		2493		一级预防		36	60	83	2493	5	4	150	0.8	30	1.5	30	1	0	0	0	1	0	0	0	1（第一次胃镜）		2017-11-21	2011-02-12	2	0	0		13520931755 、63736292	1、肝炎肝硬化 活动性 失代偿 乙型 2、脾大 3、食道静脉曲张轻度 4 上呼吸道感染5 慢性浅表胃炎 6 幽门螺杆菌感染。	1	1	0
1	52	0	0		1	2011-02-12	1	1	食管旁	1	1	0	2011-06-17	125	是			36	60	82	2473	3	5.5	100	1.83333	33.3333	1	40	0	1	0	0	0	0	0	0			2017-11-20	2011-02-28	1	0	0	好转	13911069234 、15811232337	1、肝炎肝硬化活动性失代偿期乙型 2、食道胃底静脉曲张破裂出血 3、腹水 4、腹腔感染 5、胸水6、低蛋白血症7、反流性食道炎8、冠状动脉粥样硬化性心脏病	1	1	0
1	54	1	0		0	2008-12-09	0			1	0	1	2013-07-05	1669	是			36	60	82	2490	3	3	20	1	6.66667	0.5	0	0	0	1	0	0	0	0	0			2015-10-04	2008-12-19		0	0		60483169	1、肝炎肝硬化 静止性 失代偿期 乙型 2、胃底静脉曲张重度 3、组织胶硬化治疗4、食管静脉曲张轻度5、眩晕待查：脑干栓塞不除外	1	1	0
1	39	0	1		1	2010-01-07	0			1	0	1	2014-06-17	1622	是			36	60	82	2488	13	16.5	370	1.26923	28.4615	1	30	0	1	0	0	0	0	0	0			2016-10-30	2010-01-25	2	0	0		13946260000 、15145311113	1、肝炎后肝硬化 活动性 失代偿期乙型 2、酒精性肝病 3、门脉高压 4、食道胃底静脉曲张破裂出血后胃镜下人体组织胶聚桂醇治疗术后 5、2型糖尿病 6、双眼增生性糖尿病视网膜病变 7、胆囊炎 8、右肾盂结石	1	1	0
1	48	1	0		0	2011-03-21	0			1	0	1	2013-11-21	976	是			36	60	82	2478	9	8.5	260	0.944444	28.8889	1	30	1	0	0	0	1	0	0	0	1（第一次胃镜）		2018-01-01	2011-04-11	3	0	0		13701261190 、13651268516	1、肝炎肝硬化 静止性 失代偿期 乙型 2、腹水 3、腹腔感染 4、脾功能亢进 5、食道静脉曲张 6、重度贫血 7、慢性浅表性胃炎 8、幽门螺杆菌感染	1	1	0
1	51	0	1		1	2011-03-11	0			1	0	1	2013-03-26	746	是			36	60	82	2489	4	3	120	0.75	30	1	40	1	0	0	0	1	0	0	0	1（第一次胃镜）		2018-01-02	2011-04-01	3	0	0	2013.4患者主因“发现HBsAg（+）21年，肝功能异常11年，反复呕血、黑便2年”入院，入院后给予保肝、抗病毒、利尿、抑酸、对症支持等治疗。于3月27日行内镜下曲张静脉硬化治疗，于4月1日再次行内镜下曲张静脉硬化治疗。此后未出过血，现病情稳定	13705466954无法接通 、13506366986	肝炎肝硬化 活动性 失代偿期 乙型 脾大 腹水 食管胃底静脉曲张破裂 贫血	1	1	0
1	64	0	0		0	2011-02-17	0			0	0	0		2482		是		36	60	82	2482	2	0.5	40	0.25	20	0.5	20	0	1	0	0	0	0	0	0			2017-12-04	2011-03-01	2	0	0		13511006975	1、肝炎肝硬化 活动性 失代偿期 乙型 2.胃底食管静脉曲张 3.胃溃疡 4.幽门螺杆菌感染 5、贫血 6、高血压病	1	1	0
1	24	0	1		0	2011-03-24	0			0	0	0		2463				36	60	82	2463	6	5.5	140	0.916667	23.3333	0.5	20	0	1	0	0	0	0	0	0			2017-12-20	2011-03-30	1	0	0		13522662120	1、上消化道出血 食道胃底静脉曲张破裂 2、肝炎肝硬化 活动性 失代偿期 乙型 腹水 腹腔感染 3、低蛋白血症（29g/L）	1	1	0
1	46	0	1		0	2011-03-30	0			1	1	0	2011-06-24	86	是			36	60	82	2463	9	8	230	0.888889	25.5556	0.5	20	0	1	0	0	0	0	0	0			2017-12-26	2011-04-12	1	0	0	患者肝性脑病纠正，无不适症状，请示上级医师同意患者好转出院，门诊定期复查。	13241657362 、15110039752	1、肝硬化 活动性 失代偿期 乙型 2、食道胃底静脉曲张破裂出血3、腹水 4、腹腔感染 5、胸水6、2型糖尿病7、慢性浅表性胃炎	1	1	0
2	68	0	0		1	2011-03-16	0			0	0	0		2474				36	60	82	2474	1	1	10	1	10	1	10	0	1	0	0	0	0	0	0			2017-12-23	2011-04-26	1	0	0	2011门诊张珂	13801230297	1.肝炎后肝硬化 活动性 失代偿期 乙型 门静脉高压症 食道胃底静脉曲张破裂出血 脾脏充血肿大伴功能亢进 2.2型糖尿病 3.胆囊结石 4.腹水 5.腹腔感染 6贫血	1	1	0
1	62	0	0		0	2010-07-30	1	1	脾肾	0	0	0		2460		一级预防		36	60	81	2460	6	1	120	0.166667	20	0	50	0	0	0	1	0	0	0	0			2017-04-24	2010-09-17	1	0	0		13701247887、13522840196	心脏X综合征 肝炎肝硬化活动性失代偿期乙型 食道静脉曲张重度 胃底静脉曲张轻度 食道溃疡 双眼免疫性结膜炎 过敏性鼻炎 咽喉水肿 胆囊结石 过敏性哮喘	1	1	0
2	57	0	0		0	2010-10-31	1	1	脐静脉	0	0	0		2446		一级预防		36	60	81	2446	1	0.5	30	0.5	30	0.5	30	0	1	0	0	0	0	0	0			2017-07-12	2010-11-19	1	0	0		13810035950	1、病毒性肝炎慢性乙型重度2、肝炎肝硬化 失代偿期 乙型 3、腹水 4、腹腔感染 5、低蛋白血症(26.1)	1	1	0
2	60	0	0		0	2010-01-26	1	2	脾肾	1	1	0	2010-04-15	79		一级预防		36	60	81	2448	5	2.5	140	0.5	28	0.5	30	0	1	0	0	0	0	0	0			2016-10-09	2010-02-09	1	0	0		已故、84329347、13691328430	1、肝炎肝硬化 活动性 失代偿期 乙型 2、腹水 3、腹腔感染 4、食道胃底静脉曲张重度 5、聚桂醇+组织胶治疗 6、脾功能亢进 7、胆囊结石 8、肝囊肿 9、慢性浅表性胃炎 10、慢性肾功能不全	1	1	0
1	39	0	0	1	1	2009-02-07	0			1	0	1	2016-06-12	2682	是			36	60	81	2459	3	3	40	1	13.3333	1	0	1	0	0	0	0	1	0	0	1（第一次胃镜）		2015-11-02	2009-02-20	6	0	0		13661142508	1、肝炎肝硬化 活动型 失代偿期 乙型 2、食道胃底静脉曲张破裂出血 3、失血性贫血 4、腹水 5、腹腔感染 6、低蛋白血症 7、脾功能亢进 8、两侧胸腔积液 9、心率失常 10、完全性右束支传导阻滞 11、胆囊炎	1	1	0
1	58	1	1		0	2010-12-06	0			0	0	0		2457	是			36	60	81	2457	2	0	60	0	30	0	40	0	0	0	1	0	0	0	0			2017-08-28	2010-12-28	2	0	0		13661332311	1、乙肝后肝硬化 失代偿期 活动性 乙型 肝性脑病 食道胃底静脉曲张中度 上消化道出血 重度贫血 脾功能亢进 低白蛋白血症(ALB28.1g/L) 腹水 腹腔感染 2、2型糖尿病 3、胆囊切除术后 4、前列腺增生 5、右腹股沟疝	1	1	0
2	49	0	0		0	2010-12-23	0			0	0	0		2454	是			36	60	81	2454	1	0.5	20	0.5	20	0.5	20	1	0	0	0	1	0	0	0	1（第一次胃镜）		2017-09-11	2010-12-31	2	0	0		13910329931	1、肝炎肝硬化 活动性 失代偿期 乙型 2、食道胃底静脉曲张破裂出血 3、失血性贫血 4、胃镜下聚桂醇+组织胶注射+套扎治疗术后 5、低蛋白血症 6、少量腹水 7、脾功能亢进 8、胆囊炎 9、肝囊肿 10、左肾小囊肿 11、腰椎间盘突出	1	1	0
2	40	0	0		1	2010-12-09	0			0	0	0		2431	是			36	60	81	2431	1	1	0	1	0	1	0	0	0	1	0	0	0	0	0			2017-08-05	2011-02-28	1	0	0		65083459、13141131186	1、门脉高压症 食道胃底静脉曲张破裂出血 脾大 脾功能亢进 腹水 2、胃十二指肠复合溃疡伴出血 3、肝炎肝硬化 活动性 失代偿期 乙型 4、低蛋白血症（ALB 27.1g/L） 5、中度贫血 6、腹腔感染	1	1	0
1	34	1	0		0	2010-11-02	1	1	食管旁	1	0	1	2013-02-01	822	是			36	60	80	2408	12	10.5	230	0.875	19.1667	0.5	30	1	0	0	0	1	0	0	0	1（第一次胃镜）		2017-06-06	2010-11-16	2	0	0		13167324212、13167324212	1、肝炎肝硬化 活动性 失代偿期 乙型2、上消化道出血 聚桂醇+组织胶治疗术后	1	1	0
1	52	0	0		0	2009-10-19	1	1	脐静脉	1	0	1	2012-01-17	820	是			36	60	80	2415	8	6.5	250	0.8125	31.25	1	50	0	1	0	0	0	0	0	0			2016-05-30	2009-11-09	2	0	0		15835682377	1、食道胃底静脉曲张破裂出血 2、肝炎肝硬化 静止性 失代偿期 乙型 3、脾机能(功能)亢进	1	1	0
1	46	1	1		0	2011-01-05	1	1	脾肾	0	0	0		2429		是		36	60	80	2429	1	0	20	0	20	0	20	0	0	0	1	0	0	0	0			2017-08-30	2011-01-10	1	0	0		13621312952	1、慢性乙型病毒性肝炎 2、肝硬化 3、2型糖尿病	1	1	0
1	34	1	0		0	2010-11-15	1	2	食管旁+脾肾，非常特殊	0	0	0		2429		一级预防		36	60	80	2429	1	0	20	0	20	0	20	1	0	0	0	0	0	1	0	1（第一次胃镜）		2017-07-10	2010-12-09	2	0	0		13031043740、05646975572	1、肝炎肝硬化活动性失代偿期乙型 2、腹水 3、腹腔感染 4、低蛋白血症（29.6g/l）	1	1	0
1	38	1	0		0	2011-05-04	1	1	食管旁	1	1	0	2011-08-17	105		一级预防		36	60	80	2430	1	0	10	0	10	0	10	0	0	0	1	0	0	0	0			2017-12-28	2011-05-30	1	0	0	2012.12门诊	13601064436无人接听 、13811570265空号	1、肝炎肝硬化乙型 活动性 失代偿期 2、腹水 3、腹腔感染 4、食道静脉曲张轻度5、十二指肠球溃疡（H2期）6、脾大7、胆囊炎8、肝内小囊肿9、肝右叶血管瘤10、舌动脉出血11、低蛋白血症（25.5g/l）	1	1	0
2	57	0	0		0	2011-04-11	1	2	脾肾+食管旁	0	0	0		2403		一级预防		36	60	80	2403	6	1	140	0.166667	23.3333	0.5	30	1	0	0	0	1	0	0	0	1（第一次胃镜）		2017-11-08	2011-04-29	2	0	0		13224821723 、 13844456787	1、肝炎肝硬化活动性失代偿期乙型 2、腹水 3、腹腔感染 4、食道静脉曲张重度 硬化套扎术后 5、病毒性肝炎乙型慢性重度 6、桥本甲状腺炎	1	1	0
1	35	0	0		1	2010-12-06	1	1	脾肾	1	0	1	2015-09-27	1756	是			36	60	79	2374	7	2	190	0.285714	27.1429	1	40	0	1	0	0	0	0	0	0			2017-06-06	2010-12-24	2	0	0		13611200538	1、肝炎肝硬化 活动性 失代偿期 乙型、食道胃底静脉曲张破裂出血、腹水、腹腔感染 2、上呼吸道感染	1	1	0
1	55	0	0		1	2010-11-07	1	2	脐静脉	1	0	1	2014-04-09	1249	是			36	60	79	2392	16	10.5	360	0.65625	22.5	1.5	40	0	1	0	0	0	0	0	0			2017-05-26	2010-11-25	2	0	0		61982375、15810429783	1、肝炎肝硬化 活动性 失代偿期 乙型 食道静脉曲张重度 上消化道出血 低白蛋白血症(ALB24.3g/L) 门脉高压症 脾功能亢进 腹水 腹腔感染 2、肝内占位性病变 性质待定 3、胆囊结石 4、前列腺增生症	1	1	0
1	49	0	0		0	2010-09-30	1	1	脐静脉	1	0	1	2014-02-03	1222	是			36	60	79	2395	5	1	70	0.2	14	0	0	1	0	0	0	0	0	0	1	1（第一次胃镜）		2017-04-21	2010-10-19	3	0	0		51075198、15010903152	1、肝炎肝硬化 活动性 失代偿期 乙型 2、上消化道出血 3、食道胃底静脉曲张破裂 4、腹水	1	1	0
2	66	0	0		1	2011-06-24	1	2	胃后-膈下	0	0	0		2374				36	60	79	2374	1	2	10	2	10	2	10	1	0	0	0	1	0	0	0	1（第一次胃镜）		2017-12-23	2011-07-08	2	0	0	2011.7.8目前术后12天，患者及家属要求出院，向其及家属解释，应14天左右复查胃镜，视胃镜结果决定下一步治疗方案，但患者及家属仍表示出院，请示上级周玉玲主治医师，准予其出院，嘱其不适随诊，1月后返复查胃镜。	13717748877	1、肝炎肝硬化活动性失代偿期乙型 2、上消化道出血 3、食道胃底静脉曲张破裂出血 4、腹水 5、腹腔感染 6、泌尿系感染	1	1	0
1	50	0	0		0	2010-10-17	0			1	1	0	2011-01-01	76	是			36	60	79	2385	5	2.5	100	0.5	20	2	10	0	1	0	0	0	0	0	0			2017-04-28	2010-11-12	1	0	0		13426273403、13716659776	1.门脉高压症食管胃底静脉曲张破裂出血脾大脾功能亢进腹水腹腔感染 2.肝炎后肝硬化乙型失代偿期 低蛋白血症 29.7g/l 3.右肾结石伴肾萎缩	1	1	0
2	47	0	0		1	2011-06-14	0			0	0	0		2396	是			36	60	79	2396	3	1	90	0.333333	30	1	40	1	0	0	0	1	0	0	0	1（第一次胃镜）		2018-01-04	2011-07-10	3	0	0	2014.4门诊，此后未出过血	13811170389	1、上消化道大出血 食管胃底静脉曲张破裂出血 失血性贫血（重度） 2、肝炎肝硬化 活动性 失代偿期 乙型 低蛋白血症 脾大 脾功能亢进 腹水 腹腔感染 3、胃底溃疡 4、右肺支气管扩张伴感染 5、卵巢切除术后	1	1	0
2	57	0	0		0	2011-06-15	0			0	0	0		2383		一级预防		36	60	79	2383	2	2	20	1	10	1	10	0	1	0	0	0	0	0	0			2017-12-23	2011-06-24	1	0	0	2015.12门诊林毅军	15910746058无人接听、13716701199	1、肝炎肝硬化活动性失代偿期乙型 2、胃底静脉曲张中度 组织胶+聚桂醇治疗 3、慢性浅表性胃炎 4、幽门螺旋杆菌感染 5、青光眼 6、左翼状胬肉	1	1	0
1	47	0	0		0	2010-04-09	1	1	脐静脉	1	0	1	2011-04-30	386	是			36	60	78	2367	7	3.5	170	0.5	24.2857	0.5	20	1	0	0	0	1	0	0	0	1（第一次胃镜）		2016-10-01	2010-04-27	2	0	0	门诊	13701114359、15810324827	1、肝炎肝硬化活动性失代偿期乙型 2、食管贲门静脉曲张破裂出血 3、聚桂醇+组织胶+套扎治疗术后 4、失血性贫血（中度） 5、低蛋白血症 6、脾功能亢进 7、胆石症 8、肾囊肿	1	1	0
1	42	0	1		0	2010-01-06	1	2	食管旁	0	0	0		2367		是		36	60	78	2367	1	1.5	40	1.5	40	1.5	40	0	1	0	0	0	0	0	0			2016-06-30	2010-01-22	1	0	0		13593308598	1、门脉高压症 2、上消化道出血 3、食道胃底静脉曲张破裂出血可能大 4、肝炎后肝硬化 乙型 5、脾大 6、脾功能亢进	1	1	0
1	49	0	0		1	2010-10-16	0			0	0	0		2368	是			36	60	78	2368	7	10	140	1.42857	20	1	30	0	1	0	0	0	0	0	0	1		2017-04-10	2010-11-24	1	0	0		13436836669	1、门脉高压症 食道胃底曲张静脉破裂出血 脾功能亢进 2、肝炎肝硬化 活动性 失代偿期 乙型 3、失血性贫血 4、食道胃底曲张静脉组织胶+聚桂醇治疗术后 5、腹水 6、腹腔感染 7、低蛋白血症（29.8g/L） 8、肝性脑病Ⅰ度 9、心律失常 10、窦性心动过缓 11、偶发房性早搏伴室内差异性传导	1	1	0
1	59	1	0		0	2011-03-25	0			1	1	0	2011-11-03	223	是			36	60	78	2343	2	0.5	70	0.25	35	0.5	40	0	1	0	0	0	0	0	0			2017-08-23	2011-04-11	1	0	0		13911373078	1、肝炎肝硬化 活动性 失代偿期 乙型 2、上消化道出血 3、腹水 腹腔感染 4、肺炎 胸水	1	1	0
1	53	0	0		0	2011-02-20	1	1	脐静脉	1	1	0	2011-03-01	9	是			36	60	77	2332	2	0	40	0	20	0	30	0	0	0	1	0	0	0	0			2017-07-10	2011-03-01	1	0	0		1363633119 、13810767927	1、肝炎肝硬化 活动性 失代偿期 乙型 2、上消化道出血 3、腹水 4、腹腔感染 5、十二指肠球溃疡，A1期	1	1	0
1	41	1	1		0	2011-02-14	1	1	食管旁	1	0	1	2016-03-06	1847	是			36	60	76	2282	5	5.5	170	1.1	34	1	40	1	0	0	0	1	0	0	0	1（第一次胃镜）		2017-05-15	2011-02-22	2	0	0		13311366496	1、肝炎肝硬化 活动性 失代偿期 乙型 2、上消化道出血 3、腹水 4、腹腔感染 5、慢性浅表性胃炎 6、慢性贫血	1	1	0
1	47	0	1		1	2011-02-20	0			0	0	0		2291	是			36	60	76	2291	3	2.5	90	0.833333	30	1	30	0	1	0	0	0	0	0	0			2017-05-30	2011-03-18	2	0	0		13716559866 、13161688529	1、肝炎肝硬化 活动性 失代偿期 乙型 2、食道胃底静脉曲张破裂出血 3、腹水 4、腹腔感染 5、高血压病 6、胃溃疡	1	1	0
2	54	0	0		0	2011-09-07	0			0	0	0		2309				36	60	76	2309	1	1	10	1	10	1	10	1	0	0	0	1	0	0	0	1（第一次胃镜）		2018-01-02	2011-09-22	2	0	0	2011-9-8 内镜下治疗：胃镜检查显示食道静脉曲张中度，胃底静脉曲张中度合并破裂出血，予组织胶+套扎治疗。术后继续保肝、利尿、PPI、抗感染治疗，病情恢复良好，经治疗2周，复查胃镜：食道胃底静脉曲张治疗后改变，胃底溃疡，慢性浅表性胃炎，建议3个月后复查。同时加用恩替卡韦抗病毒治疗，目前病情稳定，请示上级周玉玲主治医师，准予今日出院。	13426046145 、13436871472	1、肝炎肝硬化活动性失代偿期乙型 2、上消化道出血 3、食道胃底静脉曲张破裂出血 组织胶+套扎治疗 4、腹水 5、腹腔感染 6、低蛋白血症 7、胃底溃疡	1	1	0
2	49	0	0		0	2011-05-16	1	1	脾肾	0	0	0		2268	是			36	60	75	2268	1	1	40	1	40	1	40	0	1	0	0	0	0	0	0			2017-07-31	2011-06-05	1	0	0		1081782949 、15210027105	1、肝炎肝硬化 活动性 失代偿期 乙型 2、腹水 3、腹腔感染 4、上消化道出血 5、脾功能亢进	1	1	0
1	52	0	0		1	2011-03-24	0			0	0	0		2267	是			36	60	75	2267	5	5	150	1	30	4	40	0	1	0	0	0	0	0	0	1		2017-06-07	2011-04-07	1	0	0		84220275 、13522682049	1、肝炎肝硬化 活动性 失代偿期 乙型 2、上消化道出血 3、腹水 4、腹腔感染 5、肝性脑病 6、失血性贫血	1	1	0
1	47	0	0		0	2011-04-19	1	2	脐静脉	1	0	1	2013-10-19	914	是			36	60	74	2237	16	12	300	0.75	18.75	0	30	0	0	0	1	0	0	0	0			2017-06-03	2011-05-06	2	0	0		60512357 、13521712427	1、肝炎肝硬化 活动性 失代偿期 乙型 2、脾大 3、食道、胃底静脉曲张	1	1	0
1	37	0	0		1	2011-04-11	1	2	脐静脉+脾切除	1	1	0	2011-11-24	227	是			36	60	74	2233	4	4	100	1	25	1.5	30	1	0	0	0	1	0	0	0	1（第一次胃镜）		2017-05-22	2011-04-27	2	0	0		13520100588 、13269571565	1、肝硬化 活动性 失代偿期 乙型2、食道胃底静脉曲张重度 破裂出血 硬化套扎术后 3、腹水4、慢性浅表性胃炎 5、幽门螺杆菌感染6、胆囊炎	1	1	0
1	34	0	0		1	2011-10-24	0			0	0	0		2226	是			36	60	74	2226	3	2	110	0.666667	36.6667	1	40	1	0	0	0	1	0	0	0	1（第一次胃镜）		2017-11-27	2011-11-11	3	0	0		13633232012 、15831391739	1、肝炎肝硬化 活动性 失代偿期 乙型 2、食道胃底静脉曲张 套扎术及硬化剂治疗后 3、脾大 脾功能亢进	1	1	0
1	44	0	0		1	2011-11-14	0			0	0	0		2241				36	60	74	2241	2	1	60	0.5	30	1	40	0	1	0	0	0	0	0	0			2018-01-02	2011-12-06	3	0	0	2011.12.6住院期间，患者出现发热，肝性脑病，经抗感染，改善肝性脑病等治疗，患者体温控制，肝性脑病纠正。于2011年11月28日复查胃镜：食道胃底静脉曲张治疗后改变，聚桂醇再次治疗，3月后复查。患者经保肝，利尿，抗感染等治疗，患者病情稳定要求出院，于今日好转出院。出院后做了脾切除，现病情稳定	13716834862	1、上消化道出血 2、食道胃底静脉曲张破裂出血 3、肝炎肝硬化活动性失代偿期乙型 4、低蛋白血症 5、腹水 6、腹腔感染 7、脾大 脾功能亢进 8、肝性脑病	1	1	0
1	45	0	0		1	2011-08-01	0			0	0	0		2226	是			36	60	74	2226	2	2.5	10	1.25	5	1.5	10	0	1	0	0	0	0	0	0			2017-09-04	2011-08-12	2	0	0		13522359677 、13611348287	1、肝炎肝硬化 活动性 失代偿期 乙型 2、上消化道出血 3、腹水 4.腹腔感染 5.糖耐量异常	1	1	0
2	56	0	0		0	2011-06-06	1	2	脾肾+门脉栓塞	0	0	0		2194		一级预防		36	60	73	2194	6	11	120	1.83333	20	0.5	30	1	0	0	0	1	0	0	0	1（第一次胃镜）		2017-06-08	2011-07-11	2	0	0		15910296463 、15010114750	1、肝硬化 活动性 失代偿期 乙型 2、腹水 3、腹腔感染 4、食道胃底静脉曲张聚桂醇+组织胶+套扎治疗5、胃溃疡6、幽门息肉7、慢性浅表性胃炎8、幽门螺杆菌感染9、脾血管瘤10、胆结石11、胆囊炎12、心包积液13、泌尿系感染	1	1	0
1	27	0	0		0	2011-08-27	0			1	1	0	2011-10-20	54	是			36	60	73	2201	7	6.5	140	0.928571	20	1	30	0	1	0	0	0	0	0	0			2017-09-05	2011-09-20	1	0	0		13911750525 、18610296161	1、肝炎肝硬化 活动性 失代偿期 乙型 2、食管胃底静脉曲张破裂出血硬化剂治疗术后3、低蛋白血症（27.5G/L） 4、腹腔感染	1	1	0
1	64	0	0		0	2011-10-14	1	1	脾肾	0	0	0		2179		一级预防		36	60	72	2179	1	0	20	0	20	0	20	0	0	0	1	0	0	0	0			2017-10-01	2011-10-26	1	0	0	2016.6门诊郭江,2017.10去世	13931661151 、0316-31151666	1、肝炎肝硬化 失代偿期 活动性 乙型 腹水 腹腔感染 食管静脉轻-中度曲张 2、2型糖尿病 糖尿病视网膜病变 糖尿病神经病变 3、慢性胆囊炎 4、冠状动脉硬化性心脏病 冠状动脉支架置入术后 心界不大 心功能1级 5、高血压病2级 6、慢性浅表性胃炎	1	1	0
1	38	1	0		0	2011-06-09	1	2	脾肾	0	0	0		2184		一级预防		36	60	72	2184	2	1	20	0.5	10	0.5	10	1	0	0	0	1	0	0	0	1（第一次胃镜）		2017-06-01	2011-06-24	2	0	0		13911085257 、13611135376	1、肝炎肝硬化 活动性 失代偿期 乙型 肝性脑病 2、慢性胆囊炎 3、2型糖尿病(非肥胖)	1	1	0
1	37	0	0		0	2011-07-10	1	1	脐静脉	1	1	0	2012-01-03	177	是			36	60	72	2168	4	4.5	110	1.125	27.5	1	20	1	0	0	0	1	0	0	0	1（第一次胃镜）		2017-06-16	2011-07-20	2	0	0		18653819661	1、肝炎肝硬化 活动性 失代偿期 乙型 2、上消化道出血胃镜下治疗术后 3、低蛋白血症（27.9g/L） 4 胆系感染	1	1	0
1	52	0	0		0	2011-05-25	0			1	1	0	2012-03-08	288	是			36	60	72	2188	11	9.5	280	0.863636	25.4545	1	40	0	1	0	0	0	0	0	0			2017-05-21	2011-06-10	1	0	0		13683335015 、13121669976	1、肝炎肝硬化 活动性 失代偿期 乙型 2、上消化道出血 3、腹水 4、腹腔感染 5、脾大 6、贫血 7、高血压3级	1	1	0
1	60	1	0		0	2011-06-16	0			1	1	0	2011-07-29	43	是			36	60	72	2168	3	9	70	3	23.3333	1	10	0	1	0	0	0	0	0	0			2017-05-23	2011-07-19	1	0	0		13810129932	1、肝炎肝硬化 活动性 失代偿期 乙型2、上消化道出血 失血性休克 3、食道胃底静脉曲张破裂出血 食道胃底曲张静脉组织胶、聚桂醇治疗术后 4、腹水 5、腹腔感染 6、低蛋白血症 7、脾功能亢进 8、高血压病1级 9、2型糖尿病 10、胆囊炎 11、肺部感染 胸腔积液 12、脾肾分流	1	1	0
1	40	0	1		0	2011-07-18	1	1	脐静脉	0	0	0		2153	是			36	60	71	2153	7	4	130	0.571429	18.5714	1	40	0	1	0	0	0	0	0	0			2017-06-09	2011-08-02	2	0	0		13911110216 、13621312008	1、肝炎肝硬化活动性失代偿期乙型 2、上消化道出血 3、食道胃底静脉曲张破裂出血 4、组织胶+聚桂醇治疗 5、腹水 6、腹腔感染	1	1	0
1	61	0	0		0	2011-03-01	1	2	脾肾	0	0	0		2135		一级预防		36	60	71	2135	6	2	140	0.333333	23.3333	0.5	30	1	0	0	0	1	0	0	0	1（第一次胃镜）		2017-01-03	2011-03-25	3	0	0		13069986978 、13463512896 、13933322918	1、肝炎肝硬化 活动性 失代偿 乙型 2、食管静脉曲张 3、脾大 4、腹水 5、低蛋白血症 （27.6g/l） 6、病毒性肝炎乙型慢性重度	1	1	0
2	55	0	0		0	2010-09-02	1	1	食管旁	1	1	0	2011-02-21	172	是			36	60	71	2140	4	2.5	120	0.625	30	1	30	1	0	0	0	1	0	0	0	1（第一次胃镜）		2016-07-12	2010-09-16	2	0	0		18903130909	1、上消化道出血 2、食道胃底静脉曲张破裂出血 3、门脉高压症 食道胃底静脉曲张重度 4、肝炎肝硬化 活动性 失代偿期 乙型 5、脾大 脾功能亢进 6、腹水 低蛋白血症 7、贫血	1	1	0
1	50	0	0		1	2012-01-29	0			1	0	1	2016-09-07	1683	是			36	60	71	2135	3	1.5	100	0.5	33.3333	0.5	40	0	1	0	0	0	0	0	0			2017-12-03	2012-03-16	2	0	0		13164295520	1、肝炎肝硬化 活动性 失代偿期 乙型 2、门静脉高压症 脾亢 食道胃底静脉曲张破裂出血 3、腹水 4、腹腔感染 5、低蛋白血症（28g/L） 6、过敏性皮炎 7、皮肤干燥症 8、贫血	1	1	0
1	33	0	0		1	2012-04-10	1	2	食管旁+脾肾	1	0	1	2017-03-13	1798	是			36	60	70	2107	6	6.5	180	1.08333	30	2	30	0	1	0	0	0	0	0	0			2018-01-16	2012-05-09	3	0	0	底静脉曲张重度，ESVD，予保肝降酶、止血、补液支持治疗，患者病情好转出院。	13831228398、13102963692	1、肝炎肝硬化 活动性 失代偿期 乙型 2、食管胃底静脉曲张（重度）3、脾大 脾功能亢进 4、腹水 5、腹腔感染 6、胸腔积液 7、低蛋白血症 8、贫血 9、慢性浅表性胃炎	1	1	0
2	48	0	0		0	2012-03-29	1	1	脾肾分流	0	0	0		2105				36	60	70	2105	2	1	60	0.5	30	1	40	0	1	0	0	0	0	0	0			2018-01-02	2012-04-13	2	0	0	2012.4患者神清，精神可，体温正常，一般情况可，未诉特殊不适。	13241223125	肝炎肝硬化活动性失代偿期乙型 肝性脑病 食道静脉曲张重度破裂出血 胃镜下食道静脉曲张硬化剂治疗术后 脾大脾功能亢进 结核性胸膜炎 结核性腹膜炎 低蛋白血症 贫血 白细胞减少	1	1	0
1	40	1	1		0	2011-09-24	0			1	0	1	2014-01-07	836	是			36	60	70	2126	2	2.5	20	1.25	10	2	10	0	1	0	0	0	0	0	0			2017-07-20	2011-11-07	1	0	0	门诊	13643225329 、13582269752	1、门脉高压症食管胃底静脉曲张破裂出血脾大脾功能亢进 2、肝炎后肝硬化乙型代偿期	1	1	0
1	58	0	0		0	2011-08-29	0			1	1	0	2012-08-27	364	是			36	60	70	2101	16	13	360	0.8125	22.5	1	30	1	0	0	0	1	0	0	0	1（第一次胃镜）		2017-05-30	2011-09-27	3	0	0	已故	已故13801051077 、18601300030	1、肝炎后肝硬化 活动性 失代偿期 乙型 2、食道胃底静脉曲张破裂出血 3、腹水 4、脾大 5、胆囊结石 6、胆囊炎 7、出血性胃炎 8、高血压病	1	1	0
1	44	1	0		0	2009-07-10	0			1	1	0	2010-02-08	213	是			36	60	70	2111	12	2.5	300	0.208333	25	0.5	0	0	0	1	0	0	0	0	0			2015-04-21	2009-07-24	2	0	0	好转出院	13946754036、13846825908	1、肝炎后肝硬化静止性失代偿期乙型 2、消化道出血 3、食道静脉重度曲张	1	1	0
1	48	0	0		0	2011-06-24	1	2	脾肾	1	0	1	2014-11-29	1254	是			36	60	69	2091	6	12	220	2	36.6667	2	30	1	0	0	0	1	0	0	0	1（第一次胃镜）		2017-03-15	2011-07-21	3	0	0		13661074602	1、肝炎肝硬化 活动性 失代偿期 乙型 2、食道胃底静脉曲张破裂出血 3、胃镜下聚桂醇+组织胶+套扎治疗术后 4、失血性贫血（重度） 5、腹水 6、腹腔感染 7、低蛋白血症 8、脾功能亢进 9、吸入性肺炎 10、Ⅰ型呼吸衰竭 11、胃溃疡（A1期） 12、幽门螺旋杆菌感染 13、胸腔积液 14、2型糖尿病 15、低钾血症	1	1	0
1	51	0	0		1	2011-03-13	1	1	脐静脉	1	0	1	2013-11-25	988	是			36	60	69	2076	5	8.5	180	1.7	36	1	40	1	0	0	0	1	0	0	0	1（第一次胃镜）		2016-11-17	2011-03-25	2	0	0		188701159919 、1891078623	肝炎肝硬化 活动性 失代偿期 乙型 食道曲张静脉破裂出血 失血性休克 失血性贫血 食道曲张静脉组织胶+聚桂醇治疗术后 腹水 腹腔感染 低蛋白血症 脾大 脾功能亢进 肾功能受损 左侧胸腔积液	1	1	0
1	51	1	0		0	2011-09-24	1	1	脐静脉	1	0	1	2013-12-23	821	是			36	60	69	2090	10	13.5	250	1.35	25	1.5	40	0	1	0	0	0	0	0	0			2017-06-14	2011-10-11	3	0	0		65046550 、13661364742	1、肝炎肝硬化 活动性 失代偿期 乙型 2、上消化道出血 3、腹腔感染 4、胃溃疡	1	1	0
2	43	0	0		0	2012-03-28	1	2	脾肾分流	1	0	1	2013-11-01	583	是			36	60	69	2096	8	6.5	160	0.8125	20	3	40	0	1	0	0	0	0	0	0			2017-12-23	2012-04-17	2	0	0	2014.3患者主因间断呕血、黑便2年余。入院完善检查，诊断如上，予抗感染保肝等治疗，行胃镜检查提示食道胃底静脉曲张轻度门脉高压胃病，行组织胶+聚桂醇治疗，患者腹腔感染控制，无出血迹象，病情相对好转，患者要求出院，予安排好转出院，建议半年后复查胃镜。	18601148048无人接听、13911028747	1、上消化道出血 2、食道胃底静脉曲张破裂出血 3、肝炎肝炎硬化活动性失代偿期乙型 4、脾大 5、脾功能亢进 6、贫血 7、门脉高压性胃病 9、返流性食管炎 10、白细胞减少症	1	1	0
1	47	1	1		1	2011-10-01	0			0	0	0		2073	是			36	60	69	2073	5	0.5	100	0.1	20	0.5	10	1	0	0	0	1	0	0	0	1（第一次胃镜）		2017-06-04	2011-10-28	6	0	0		13716643477	1、上消化道出血 2、食道胃底静脉曲张破裂出血 3、肝炎肝硬化活动性失代偿期乙型 腹水 腹腔感染 低蛋白血症（25.6g/L）脾大 4、食管溃疡	1	1	0
1	26	0	1		0	2012-03-03	1	2	脾肾	0	0	0		2048		一级预防		36	60	68	2048	11	11.5	270	1.04545	24.5455	4	30	0	1	0	0	0	0	0	0			2017-10-11	2012-03-28	3	0	0		0314-8701079	1、肝炎肝硬化 活动性 失代偿期 乙型 2、腹水 3、腹腔感染 4、食管胃底就静脉重度曲张 4、硬化剂治疗术后 5、低蛋白血症	1	1	0
1	48	0	0		0	2011-06-16	1	2	脾肾	1	1	0	2011-10-02	108	是			36	60	68	2049	16	11	430	0.6875	26.875	1	40	0	1	0	0	0	0	0	0			2017-01-24	2011-06-30	2	0	0		13801018332	1、上消化道出血 2、肝炎肝硬化 活动性 失代偿期 乙型 3、低蛋白血症（28g/L） 4、腹水 5、食道胃底静脉曲张 6、肝性脑病	1	1	0
1	38	1	0		0	2012-03-13	0			1	0	1	2016-04-01	1480	是			36	60	68	2053	6	4.5	130	0.75	21.6667	1	10	0	1	0	0	0	0	0	0			2017-10-26	2012-03-30	4	0	0		13241553102、13801037361	1、肝炎肝硬化 活动性 失代偿期 乙型 2、上消化道出血 失血性贫血 3、食道胃底静脉曲张破裂出血 组织胶聚桂醇治疗术后 4、脾功能亢进	1	1	0
1	27	1	0		1	2011-04-19	0			0	0	0		2069	是			36	60	68	2069	3	0.5	40	0.166667	13.3333	0.5	0	0	0	1	0	0	0	0	0			2016-12-17	2011-05-16	4	0	0		15010598923	1、肝炎肝硬化活动性失代偿期乙型 2、上消化道出血 食道贲门静脉曲张破裂出血 组织胶+硬化+套扎治疗 3、腹水 4、低蛋白血症（ALB23.9g/L） 5、脾大 6、脾功能亢进	1	1	0
1	58	0	0		1	2011-05-30	1	2	脐静脉	1	0	1	2014-03-28	1033	是			36	60	67	2019	7	8.5	180	1.21429	25.7143	1	40	0	1	0	0	0	0	0	0			2016-12-08	2011-06-20	3	0	0		60987222	1、上消化道出血 食道胃底静脉曲张破裂出血 组织胶+聚桂醇治疗 2、肝炎肝硬化活动性失代偿期乙型 腹水 腹腔感染 低蛋白血症（ALB23.5G/L） 3、中度贫血 失血性贫血 4、低钾血症	1	1	0
1	34	0	0		1	2011-11-25	1	2	脐静脉+门脉右支-下腔	0	0	0		2020	是			36	60	67	2020	8	2.5	160	0.3125	20	1	40	0	1	0	0	0	0	0	0			2017-06-06	2011-12-08	2	0	0		13910917255	1、消化道溃疡出血（胃底排胶溃疡） 2、肝炎肝硬化 活动性 失代偿期 乙型 3、腹水 4、腹腔感染 5、低钾血症6、脾功能亢进	1	1	0
1	48	0	0		0	2012-06-17	1	2	脾肾	0	0	0		2025				36	60	67	2025	1	1.5	10	1.5	10	1.5	10	0	1	0	0	0	0	0	0			2018-01-02	2012-08-03	1	0	0	2012.6黄疸仍处于波动状态，无明显好转。PTA 26.0%，凝血功能差。患者今日出院，于外院行肝移植术。目前患者计算力及定向力正常，反应稍慢，嗜睡。出院后行肝移植，此后病情平稳	13722508160	1、慢性肝衰竭 2、肝硬化 活动性 失代偿期 乙型 3、肝性脑病 4、病毒性肝炎戊型急性黄疸型 5、腹水 腹腔感染 6、低蛋白血症 7、慢性浅表性胃炎 8、幽门螺杆菌感染 9、胃溃疡H2期 10、贲门食管静脉曲张重度 11、上消化道出血 12、营养不良性贫血 13、失血性贫血 14、低钾血症 15、低钠血症 16、双肺炎症 17、胸水 18脾大 脾功能亢进	1	1	0
1	36	0	0		0	2010-08-07	1	1	脐静脉	1	1	0	2011-07-04	331	是			36	60	67	2017	5	3.5	130	0.7	26	0.5	40	0	1	0	0	0	0	0	0			2016-02-14	2010-08-16	1	0	0		13552315987、13261485160	1、肝炎肝硬化 活动性 失代偿期 乙型 2、食道胃底静脉曲张破裂出血 3、组织胶+聚桂醇治疗术后 4、失血性休克 5、失血性贫血（重度） 6、腹水 7、腹腔感染 8、脾功能亢进 9、高钾血症	1	1	0
1	34	0	0		0	2010-02-03	0			1	0	1	2014-09-10	1680	是			36	60	67	2030	3	2	70	0.666667	23.3333	1	60	0	1	0	0	0	0	0	0			2015-08-26	2010-02-21	2	0	0		15963887988、15963887988	1、肝炎肝硬化 活动性 失代偿期 乙型 2、上消化道出血 3、腹水 4、低蛋白血症 5、慢性浅表性胃炎 6、胃底溃疡（排胶后）	1	1	0
1	69	0	0		0	2009-02-08	0			1	0	1	2013-03-01	1482	是			36	60	67	2024	3	5	50	1.66667	16.6667	1.5	10	1	0	0	0	1	0	0	0	1（第一次胃镜）		2014-08-25	2009-03-03	2	0	0		13910104188、13701154887	1、肝炎肝硬化 活动性失代偿期 乙型 2、腹水 3、脾大 4、脾功能亢进 5、食道胃底静脉曲张套扎、组织胶硬化治疗术后 6、高血压 7、右下肺炎 8、甲癣	1	1	0
1	36	1	0		0	2012-02-20	0			0	0	0		2027	是			36	60	67	2027	2	1	70	0.5	35	0.5	40	0	1	0	0	0	0	0	0			2017-09-08	2012-03-02	2	0	0		13522540372	1、肝炎肝硬化活动性失代偿期乙型 2、食道胃底静脉曲张重度、组织胶+硬化剂治疗后 3、门脉高压性胃病 4、脾功能亢进 5、贲门排胶溃疡	1	1	0
1	53	1	0		0	2012-02-23	0			0	0	0		2036	是			36	60	67	2036	1	0.5	10	0.5	10	0.5	10	0	1	0	0	0	0	0	0			2017-09-20	2012-03-07	1	0	0		0316-8599975、15931622801	肝炎肝硬化活动性失代偿期乙型 食道贲门静脉曲张破裂出血胃镜下治疗后 低蛋白血症 腹水 脾功能亢进 肝囊肿 胆囊炎	1	1	0
1	63	0	0		0	2012-06-16	0			0	0	0		2026	是			36	60	67	2026	5	2.5	110	0.5	22	1	20	1	0	0	0	1	0	0	0	1（第一次胃镜）		2018-01-02	2012-07-05	2	0	0	2016年10月18日胃镜示食管胃底静脉曲张治疗后改变，食管胃底静脉曲张轻度，聚桂醇+组织胶治疗建议：半年后复查。胸片未见异常。腹部超声：肝硬化、脾大、腹水、肝多发囊肿、胆囊壁毛糙。患者目前病情好转，经上级医师批准出院。	89021888无法接通、15910342036	上消化道出血 食管胃底静脉曲张破裂出血 肝炎肝硬化活动性失代偿期乙型 腹水 低蛋白血症 脾大 脾功能亢进 贲门排胶溃疡	1	1	0
2	36	0	0		0	2011-04-18	0			1	0	1	2012-11-07	569	是			36	60	67	2013	11	6.5	210	0.590909	19.0909	1	30	1	0	0	0	1	0	0	0	1（第一次胃镜）		2016-10-21	2011-05-06	3	0	0		13994055806	1、肝炎肝硬化 失代偿期 乙型 2、腹水 3、腹腔感染 4、脾功能亢进 5、食道胃底静脉曲张 6、2型糖尿病	1	1	0
2	46	0	0		0	2012-03-11	0			0	0	0		2019	是			36	60	67	2019	1	0	0	0	0	0	0	1	0	0	0	0	0	0	1	1（第一次胃镜）		2017-09-20	2012-04-27	1	0	0		13716376215、13661143236	肝炎肝硬化 活动性 失代偿期 乙型 门静脉高压症 脾大 脾功能亢进 食道静脉重度曲张破裂出血 贫血 粒细胞缺乏症 急性胰腺炎 脾周围炎 低蛋白血症	1	1	0
2	65	0	0		0	2011-04-01	0			0	0	0		2021		是		36	60	67	2021	4	2.5	90	0.625	22.5	1.5	40	1	0	0	0	1	0	0	0	1（第一次胃镜）		2016-10-12	2011-04-20	2	0	0	2016.10.6患者出现上消化道出血，予生长抑素降门脉压止血，患者不行胃镜治疗，已签字。后患者出血停止，但腹腔感染、腹水、肝肾综合征，病情危重患者精神食欲欠佳，乏力，神志恍惚，患者要求出院。查体 神志恍惚，踝阵挛阳性。李明慧主任指示予人血白蛋白纠正低蛋白血症，予瑞苷治疗肝性脑病，患者及家属要求自动出院，已签字，予自动出院。。	69048717 、13520023690	1、肝炎肝硬化活动性 失代偿期 乙型 2、食道胃底静脉曲张硬化剂治疗术后 3、腹水 4、病毒性肝炎 慢性 乙型重度	1	1	0
1	36	0	0		1	2011-12-22	1	2	脾肾分流	1	0	1	2015-12-18	1457	是			36	60	66	2009	6	6	170	1	28.3333	1.5	50	0	1	0	0	0	0	0	0			2017-06-22	2012-01-10	7	0	0		67142936、13681261253	1、肝炎肝硬化活动性失代偿期乙型 2、上消化道出血 3、食道静脉曲张重度、硬化治疗术后	1	1	0
1	61	1	0		0	2012-04-26	1	1	食管旁	1	0	1	2014-04-11	715	是			36	60	66	1982	12	19.5	320	1.625	26.6667	3	40	0	1	0	0	0	0	0	0			2017-09-29	2012-05-08	2	0	0		13391523358	1、肝炎肝硬化活动性失代偿期乙型 2、食管胃底静脉曲张 聚桂醇+组织胶治疗 4、脾大 5、脾亢 6、食管溃疡	1	1	0
1	57	0	0		0	2012-03-28	1	2	脐静脉	0	0	0		2006				36	60	66	2006	3	2	110	0.666667	36.6667	1.5	60	0	1	0	0	0	0	0	0			2017-09-24	2012-04-09	2	0	0	2012.11出院，刚去世100天	15832714188无法接通、13785700694	1、肝炎肝硬化 活动性 失代偿期 乙型 2、食道胃底静脉曲张硬化治疗术后	1	1	0
1	40	0	0		0	2011-12-26	1	1	脐静脉	1	1	0	2012-03-24	89	是			36	60	66	1996	14	10	380	0.714286	27.1429	1.5	20	1	0	0	0	1	0	0	0	1（第一次胃镜）		2017-06-13	2012-01-13	1	0	0		15601072809	1、上消化道出血 食管胃底静脉破裂出血贫血（中度） 2、肝炎肝硬化 活动性 失代偿期 乙型 脾大 脾功能亢进	1	1	0
2	59	0	0		0	2012-07-02	1	2	脾肾分流	1	0	1	2014-07-01	729	是			36	60	66	1997	3	1	90	0.333333	30	0	30	0	0	0	1	0	0	0	0			2017-12-20	2012-07-11	2	0	0	门诊于浩	13910722669	1、上消化道出血 2、肝炎肝硬化活动性失代偿期乙型 腹水 脾大 脾功能亢进 食道胃底静脉曲张 3、门脉高压性胃病 4、肝内占位 5、右肾囊肿 6、肝囊肿 7、胆囊炎 8、胸腔积液	1	1	0
2	52	0	0		1	2011-12-10	1	2	脾肾	0	0	0		1992	是			36	60	66	1992	1	0.5	30	0.5	30	0.5	30	0	1	0	0	0	0	0	0			2017-05-24	2011-12-23	1	0	0		69043391	1、消化道出血 2、肝硬化 失代偿期 乙型 3、食道静脉曲张硬化治疗术后4、腹水 5、腹腔感染 6、肝占位	1	1	0
1	47	0	0		0	2010-10-06	0			1	0	1	2014-12-13	1529		一级预防		36	60	66	2004	3	5.5	90	1.83333	30	0	30	0	0	0	1	0	0	0	0			2016-04-01	2010-10-22	1	0	0	2015.1患者现化验血象不高、不支持细菌感染，体温尚不稳定，建议继续留观，家属及患者拒绝，签字出院，嘱院外规律用药，定期复查。2016.4去世	13911108981、18901052223	1，肝炎后肝硬化活动性失代偿期乙型	1	1	0
1	38	1	0		0	2011-10-29	0			1	0	1	2013-12-07	770	是			36	60	66	1981	8	6	260	0.75	32.5	2	50	0	1	0	0	0	0	0	0			2017-04-01	2011-11-10	2	0	0		13716123421 、13681592350	1、肝炎肝硬化失代偿期乙型2、上消化道出血3、食道胃底静脉曲张硬化治疗术后	1	1	0
1	43	1	0		1	2012-05-28	0			1	0	1	2013-06-22	390	是			36	60	66	2002	13	8.5	340	0.653846	26.1538	1	40	0	1	0	0	0	0	0	0			2017-11-20	2012-06-21	4	0	0		13701246965、13701278917	1、食管胃底静脉曲张破裂出血 失血性贫血（中度） 2、肝炎肝硬化 活动性 失代偿期 乙型 脾大 脾功能亢进 腹水 白细胞减少症 3、反流性食管炎	1	1	0
2	46	0	0		0	2012-02-26	0			1	0	1	2013-08-23	544	是			36	60	66	1989	6	6	120	1	20	1	20	0	1	0	0	0	0	0	0			2017-08-07	2012-04-06	1	0	0		13811543787、15810428929	1.肝炎肝硬化 活动性 失代偿期 乙型 2.门静脉高压症 脾大 脾亢 食道胃底静脉曲张破裂出血 腹水 腹腔感染 3.肝性脑病 4.低蛋白血症 5.贫血 6.粒细胞缺乏症	1	1	0
1	42	1	0		1	2012-08-04	1	2	脐静脉	0	0	0		1972				36	60	65	1972	1	2.5	20	2.5	20	2.5	20	0	1	0	0	0	0	0	0			2017-12-28	2012-08-24	1	0	0	2013.1门诊	15910472846	上消化道出血 胃底静脉曲张破裂出血 重度贫血 肝炎肝硬化 活动性 失代偿期 乙型 脾功能亢进 低蛋白血症 腹水 胃穿孔修补术后	1	1	0
2	76	0	0		0	2012-07-24	1	2	脐静脉+脾肾	1	0	1	2016-01-05	1260	是			36	60	65	1978	5	7	70	1.4	14	2	10	0	1	0	0	0	0	0	0			2017-12-23	2012-08-13	3	0	0	2016.3予保肝降酶对症支持治疗，患者病情好转出院。	13718820728	食管胃底静脉曲张破裂出血 贫血 肝炎肝硬化 活动性 失代偿期 乙型 腹水 腹腔感染 低蛋白血症 冠心病	1	1	0
1	34	0	0		0	2012-08-08	0			0	0	0		1975				36	60	65	1975	4	1	100	0.25	25	1	20	1	0	0	0	1	0	0	0	1（第一次胃镜）		2018-01-04	2012-08-27	3	0	0	2013.5.16入院后给予保肝及胃镜下食管硬化治疗。出院后间断出血，在当地治疗，现病情稳定	13941869770、13941804894	1、肝炎肝硬化 乙型 活动性 失代偿期 食道胃底静脉重度曲张套扎、硬化术后	1	1	0
1	53	0	0		0	2012-05-03	0			0	0	0		1964	是			36	60	65	1964	10	8.5	270	0.85	27	1	50	0	1	0	0	0	0	0	0			2017-09-18	2012-05-22	2	0	0		13833601606	1、肝炎肝硬化 活动性 失代偿期 乙型 2、腹水 上消化道出血 胃镜下硬化剂治疗 肝囊肿 3、高血压 4、2型糖尿病	1	1	0
2	27	0	0		0	2012-04-07	0			0	0	0		1962		一级预防		36	60	65	1962	2	1	30	0.5	15	0.5	20	0	1	0	0	0	0	0	0			2017-08-21	2012-04-26	2	0	0		18631912882、15175465430	1、肝炎肝硬化 活动性 失代偿期 乙型 2、腹水 3、低蛋白血症 4、脾功能亢进 5、上消化道出血 6、贫血 7、白细胞减少症 8、血小板减少症 9、胃溃疡	1	1	0
1	30	0	0		1	2012-02-08	1	2	脾切除+脾肾	1	1	0	2013-01-06	333	是			36	60	64	1938	12	9.5	290	0.791667	24.1667	1	10	0	1	0	0	0	0	0	0			2017-05-30	2012-03-02	2	0	0		15901390414、13810010060	1、肝炎肝硬化 活动性 失代偿期 乙型 2、食道胃底静脉曲张破裂出血经组织胶+聚桂醇治疗术后 3、脾大 4、腹水 5、胸水 6、胆囊炎 7、反流性食道炎8、败血症9、低蛋白血症（29.9g/L）10、贫血	1	1	0
2	60	0	0		0	2012-09-15	1	2	脾肾	0	0	0		1930	是			36	60	64	1930	1	0.5	40	0.5	40	0.5	40	0	1	0	0	0	0	0	0			2017-12-28	2012-09-26	1	0	0	2016.4.27门诊谢雯	13811082415停机、13716397199	肝炎肝硬化 活动性 失代偿期 乙型 食道胃底静脉曲张破裂出血 组织胶治疗术后 脾功能亢进 肝多发囊肿抽吸术后	1	1	0
1	46	1	1		1	2011-09-19	0			1	0	1	2015-10-14	1486	是			36	60	64	1927	5	1.5	120	0.3	24	1	20	1	0	0	0	1	0	0	0	1（第一次胃镜）		2016-12-28	2011-10-11	3	0	0		13051902618 、61906710	1、上消化道出血 2、食道胃底静脉曲张破裂出血 3、肝炎肝硬化活动性失代偿期乙型 4、酒精性肝硬化失代偿期 5、脾大 白细胞减少症 6、反流性食管炎 7、贲门溃疡 8、过敏性鼻炎 慢性鼻炎 外耳廓湿疹 9、失眠	1	1	0
1	48	1	0		1	2012-03-10	0			1	0	1	2014-03-06	726	是			36	60	64	1948	8	7.5	240	0.9375	30	1.5	20	1	0	0	0	1	0	0	0	1（第一次胃镜）		2017-07-10	2012-04-01	3	0	0		13810848093、13552642746	1、上消化道出血 2、肝炎肝硬化 活动性 失代偿期 乙型 3、腹水 4、低蛋白血症 5、腹腔感染 6、脂肪肝 7、贫血	1	1	0
1	53	1	0		1	2011-03-02	0			1	0	1	2012-09-10	558		一级预防		36	60	64	1925	3	0.5	60	0.166667	20	0	30	1	0	0	0	0	0	1	0	1（第一次胃镜）		2016-06-08	2011-04-11	3	0	0		13932344547 、13717700345	1、肝炎肝硬化 活动性 失代偿期 乙型 、门脉高压症、食管静脉重度曲张、内镜套扎硬化治疗术后 、2、肝内占位性病变 、血管瘤介入术后改变可能性大 3 胆囊结石	1	1	0
1	29	0	0		0	2009-09-10	0			0	0	0		1929	是			36	60	64	1929	1	0	0	0	0	0	0	1	0	0	0	0	0	0	1	1（第一次胃镜）		2014-12-22	2009-10-20	1	0	0		13466798318、13718683331	1、上消化道出血 2、食道胃底静脉曲张 3、肝炎肝硬化 活动性 失代偿期 乙型 4、腹水	1	1	0
1	55	0	0		0	2012-08-31	0			0	0	0		1950				36	60	64	1950	1	0.5	40	0.5	40	0.5	40	0	1	0	0	0	0	0	0			2018-01-02	2012-09-19	1	0	0	2012.9患者仍有右侧肢体活动障碍，其他未诉特殊不适。精神、睡眠、食欲可。查体：生命体征平稳，神志清楚，上肢肌力为0级，右下肢肌力3级，余查体同前。继续检查早期康复理疗。复查血常规示：丙氨酸氨基转移酶、门冬氨酸氨基转移酶、总胆红素正常，直接胆红素 7.2umol/L，白蛋白 32.4g/L，胆碱酯酶 2329.00U/L。电解质+肾功示：钾 3.46mmol/L，尿酸 138umol/L，余正常。血常规示： 单核细胞百分比 15.56%，红细胞计数 3.23*10~12/L，血红蛋白 87.2g/L，红细胞压积 28.97%，平均血红蛋白浓度 301.0g/L，红细胞分布宽度 16.45%。	13765328418、13765477444	1、食管胃底静脉曲张破裂出血 2、肝炎肝硬化 活动性 失代偿期 乙型 3、脑梗塞 4、失血性贫血（重度） 5、低蛋白血症 6、腹水 7、腹腔感染 8、糖尿病	1	1	0
1	45	0	0		0	2010-09-13	0			1	1	0	2011-01-06	115	是			36	60	64	1922	6	7	210	1.16667	35	1	60	0	1	0	0	0	0	0	0			2015-12-18	2010-09-25	1	0	0		13716183893、13716183893	1、肝炎肝硬化 活动性 失代偿期 乙型 2、食道胃底静脉曲张破裂出血3、组织胶+硬化治疗术后 4、腹水 5、腹腔感染 6、胸腔积液、7、低白蛋白血症 8、门静脉栓塞 9、脾功能亢进 10、胃窦息肉	1	1	0
1	36	0	0		0	2011-07-29	0			1	1	0	2011-09-16	49	是			36	60	64	1930	1	0.5	30	0.5	30	0.5	30	0	1	0	0	0	0	0	0			2016-11-09	2011-08-08	1	0	0		15530327136	1、肝炎肝硬化 活动性 失代偿期 乙型 2、上消化道出血 3、腹水 腹腔感染	1	1	0
1	47	1	1		0	2012-03-05	1	2	门脉-下腔	1	0	1	2014-08-18	896	是			36	60	63	1897	8	14.5	210	1.8125	26.25	3	30	0	1	0	0	0	0	0	0			2017-05-15	2012-03-26	2	0	0		15910261691	食管静脉曲张破裂出血 胃镜下治疗后 失血性贫血 肝炎肝硬化 失代偿期 乙型 腹水 腹腔感染 低蛋白血症（22.4g/L）高血压 食管胃底溃疡 胆汁反流性胃炎	1	1	0
1	55	0	0		0	2009-05-04	1	2	脾肾	0	0	0		1895		一级预防		36	60	63	1895	1	1	0	1	0	1	0	0	0	1	0	0	0	0	0			2014-07-12	2009-05-15	1	0	0		69443311	1、肝炎后肝硬化 活动性失代偿期 乙型 2、肝内占位：肝内结节介入治疗术后 3、胃底静脉重度曲张硬化治疗术后	1	1	0
1	62	0	0		0	2012-02-09	1	2	胃后-下腔	1	1	0	2012-04-07	58	是			36	60	63	1910	8	4.5	200	0.5625	25	0	40	0	0	0	1	0	0	0	0			2017-05-03	2012-03-02	3	0	0		13501130814	1、消化道出血 2、肝炎肝硬化 活动性 失代偿期 乙型 3、脾功能亢进 4、食道胃底静脉曲张中度5、排胶溃疡6、门脉高压性胃病	1	1	0
2	49	0	0		0	2012-04-03	1	2	脐静脉+食管旁	1	0	1	2015-01-14	1016	是			36	60	63	1898	8	2.5	180	0.3125	22.5	1.5	40	0	1	0	0	0	0	0	0			2017-06-14	2012-04-18	2	0	0		15632409126	1、肝炎肝硬化 活动性 失代偿期 乙型 2、食管胃底静脉曲张破裂出血 3、食管胃底静脉曲张硬化治疗后4、食管溃疡 5、胃溃疡 6、低蛋白血症 7、腹水 8、脾功能亢进 9、失血性贫血	1	1	0
2	52	0	0		1	2011-11-26	1	1	脾切除+脐静脉	0	0	0		1903	是			36	60	63	1903	2	1.5	50	0.75	25	1.5	30	0	1	0	0	0	0	0	0			2017-02-10	2011-12-12	2	0	0		13623248535 、13552520166	1、上消化道出血 2、肝炎肝硬化 活动性 失代偿期 乙型 3、食道胃底静脉曲张破裂出血 4、低蛋白血症 5、腹水 6、腹腔感染 7、白细胞减少 8、低钾血症 9、慢性浅表性胃炎	1	1	0
1	57	0	0		1	2012-10-18	0			1	0	1	2015-02-17	852	是			36	60	63	1902	9	10	270	1.11111	30	1	40	0	1	0	0	0	0	0	0	1		2018-01-02	2012-11-02	2	0	0		13930249339	1、肝炎肝硬化 活动性 失代偿期 乙型 腹水 2、脾功能亢进 白细胞减少症 血小板减少症3、上消化道出血 食道胃底静脉曲张破裂出血 4、贫血 5、2型糖尿病 6、低钙血症7、低钾血症	1	1	0
1	60	0	0		0	2012-10-15	0			0	0	0		1905				36	60	63	1905	1	2	10	2	10	2	10	0	1	0	0	0	0	0	0			2018-01-02	2012-12-12	1	0	0	2013.5门诊，后来又出过血，2014.9最后一次出血，外院治疗后未再出过血	13693143675、６３５１９６４２	消化道出血 小肠炎性肠病 门脉高压症 脾大脾功能亢进 食管胃底静脉曲张 肝炎后肝硬化乙型失代偿期 高血压病 低蛋白血症（28.9g/L) 腹水 贫血 (60g/l) 主动脉窦瘤破裂修补术后 室间隔缺损修补术后 肠道菌群失调	1	1	0
2	58	0	0		0	2012-03-06	0			1	0	1	2016-10-22	1691	是			36	60	63	1906	4	7.5	100	1.875	25	1.5	0	1	0	0	0	0	1	0	0	1（第一次胃镜）		2017-05-25	2012-04-28	2	0	0		13520059007、13661242600	肝炎肝硬化 活动性 失代偿期 乙型 门静脉高压症 脾大 脾功能亢进 粒细胞缺乏症 贫血 胃底静脉重度曲张破裂出血 门脉高压性胃病 腹水 两侧胸腔积液 低蛋白血症 双下肺炎 上颚脓肿 胆囊结石 肝囊肿 肠道感染 肠道真菌感染 肠道菌群失调 低钾血症 上感 门脉系统血栓 脾周围炎	1	1	0
1	64	1	0		0	2012-08-04	1	2	食管旁+脾肾	1	0	1	2014-05-29	663	是			36	60	62	1861	5	5.5	90	1.1	18	0.5	10	0	1	0	0	0	0	0	0			2017-09-08	2012-08-16	2	0	0		0316-3521532、13621035576	1、肝炎肝硬化 活动性 失代偿期 乙型 2、食道胃底静脉曲张破裂出血 3、腹水 4、脾功能亢进 5、门静脉主干及右支部分栓塞 6、慢性胆囊炎 7、胆结石 8、白细胞减少症 9、贫血10、肠道菌群紊乱11、低钾血症12、双肾囊肿	1	1	0
1	40	1	0		0	2012-05-25	1	1	脐静脉	1	0	1	2014-01-03	588	是			36	60	62	1870	10	10.5	330	1.05	33	2	40	0	1	0	0	0	0	0	0			2017-07-08	2012-06-21	2	0	0		13801302375、13641288838	1、肝炎肝硬化 活动性 失代偿期 乙型 2、胃底静脉曲张破裂出血 3、食道静脉曲张 4、脾大 5、腹水 6、右侧胸水 7、肠道菌群失调 8、直肠炎 9、内痔	1	1	0
1	58	0	0		0	2012-08-15	1	2	脾肾	0	0	0		1863		一级预防		36	60	62	1863	2	4	30	2	15	4	20	0	1	0	0	0	0	0	0			2017-09-21	2012-08-24	1	0	0		13311370403	胃底静脉曲张 胃镜下硬化+栓塞术后 胃底溃疡 肝炎肝硬化 活动性 失代偿期 乙型	1	1	0
1	43	0	0		1	2012-11-14	1	1	脐静脉	1	1	0	2013-01-24	71	是			36	60	62	1864	6	3.5	170	0.583333	28.3333	1.5	40	0	1	0	0	0	0	0	0			2017-12-22	2012-11-26	2	0	0	予阿德福韦酯抗病毒，乌苯美司、肝复乐抗肿瘤，复方甘草酸苷抗肝细胞炎症，还原性谷胱甘肽清除氧自由基，前列地尔改善肝脏微循环，胸腺五肽调节免疫，苦参素辅助保肝。患者原发性肝癌，建议继续完善腹部MRI了解肝脏肿瘤进展情况，患者拒绝，并签字要求今日出院，予办理。	13718670880、03155589437	1、肝炎肝硬化 活动性 乙型 失代偿期 2、上消化道出血 胃溃疡	1	1	0
2	51	0	0		0	2011-07-22	1	2	脾肾	1	1	0	2012-07-11	355	是			36	60	62	1879	3	2	80	0.666667	26.6667	1	30	1	0	0	0	1	0	0	0	1（第一次胃镜）		2016-09-12	2011-08-03	2	0	0		13269074976	1、肝炎肝硬化 活动性 失代偿期 乙型 2、食道胃底静脉曲张破裂出血 3、聚桂醇+组织胶+套扎止血治疗术后 4、失血性贫血 5、腹水 6、腹腔感染 7、低蛋白血症 8、脾机能(功能)亢进 9、低钾血症 10、胆囊结石 11、胆囊炎	1	1	0
1	46	1	1		1	2011-04-09	0			1	0	1	2014-07-11	1189	是			36	60	62	1873	5	6	80	1.2	16	0	30	1	0	0	0	0	0	1	0	1（第一次胃镜）		2016-05-25	2011-04-30	2	0	0		13161486160 、13716579622	1、肝炎肝硬化活动性失代偿期乙型 2、食管静脉曲张破裂出血 3、聚桂醇+套扎治疗术后 4、低蛋白血症 5、腹水 6、脾功能亢进 7、肝囊肿 8、胸腔积液（右侧）	1	1	0
1	33	0	1		0	2012-08-13	0			0	0	0		1870	是			36	60	62	1870	3	1	20	0.333333	6.66667	1	0	0	0	1	0	0	0	0	0	1		2017-09-26	2012-08-23	3	0	0		13661395188、69456306	1、肝炎肝硬化活动性失代偿期乙型 2、上消化道出血 食管静脉曲张破裂出血 套扎+组织胶+聚桂醇治疗 3、腹水 4、腹腔感染 5、低蛋白血症 6、脾功能亢进	1	1	0
1	51	0	1		0	2012-11-06	0			1	1	0	2013-02-23	109	是			36	60	62	1863	2	3.5	40	1.75	20	1.5	10	1	0	0	0	1	0	0	0	1（第一次胃镜）		2017-12-13	2012-11-23	2	0	0	门诊徐艳利	13146325788、13121171271	1、上消化道出血 2、肝炎肝硬化活动性失代偿期乙型 、3、脾大脾功能亢进 4、腹水 腹腔感染 5、低蛋白血症 7、门脉高压 8、食管胃底静脉曲张 9、胃底静脉曲张 10、肝性脑病 11、低钾血症 12、癫痫 13、失血性贫血 14、粒细胞减少症 15、癫痫大发作	1	1	0
2	70	0	1		0	2010-08-18	0			1	1	0	2010-09-25	38	是			36	60	62	1868	2	1	40	0.5	20	1	20	0	1	0	0	0	0	0	0			2015-09-29	2010-09-01	1	0	0		61922701	1、肝炎肝硬化 活动性 失代偿期 乙型 上消化道出血 腹水 腹腔感染 胃底静脉中度曲张；2、组织胶+聚桂醇治疗后；	1	1	0
1	41	0	0		0	2012-09-25	1	2	脾肾	0	0	0		1857	是			36	60	61	1857	1	6	30	6	30	6	30	0	1	0	0	0	0	0	0			2017-10-26	2012-10-15	1	0	0		13718099007、60463791	1、上消化道出血 食道胃底静脉曲张破裂出血 2、肝炎肝硬化 活动性 失代偿期 乙型、低蛋白血症、脾功能亢进 3、胆囊结石	1	1	0
1	56	0	0		0	2012-03-15	1	2	食管旁+脐静脉	0	0	0		1834		一级预防		36	60	61	1834	1	2	50	2	50	2	50	0	1	0	0	0	0	0	0			2017-03-23	2012-03-31	1	0	0		13931409257、13731419791	1、肝炎肝硬化 活动性 失代偿期 乙型 2、腹水 腹腔感染 3、低白蛋白血症4、脾机能(功能)亢进 5、食道静脉曲张重度6、白细胞减少症 粒细胞减少症7、低钙血症8、肺部感染9、慢性浅表性胃炎10、低钾血症	1	1	0
1	56	1	1		1	2012-05-02	1	1	脐静脉	1	1	0	2013-04-06	339	是			36	60	61	1831	10	14	190	1.4	19	1	10	0	1	0	0	0	0	0	0			2017-05-07	2012-05-15	1	0	0		13801012388、13801071618	1、上消化道出血 失血性休克 2、肝炎肝硬化 失代偿期 活动性 乙型 脾功能亢进 胃底静脉曲张重度 低白蛋白血症ALB(19.8g/l) 腹水 腹腔感染 3、2型糖尿病 糖尿病视网膜病变1期 4、贫血 5、食管炎 6、糜烂性十二指肠炎 7、高脂血症 8、高钾血症	1	1	0
1	45	0	0		1	2011-10-29	1	2	食管旁+脾肾	1	1	0	2012-03-03	126	是			36	60	61	1847	10	12.5	260	1.25	26	2.5	40	0	1	0	0	0	0	0	0			2016-11-18	2011-11-25	1	0	0		18600041492	上消化道出血 食道胃底静脉曲张重度破裂出血 胃冠状静脉栓塞术后 肝炎肝硬化活动性失代偿期乙型 脾大 脾功能亢进 低蛋白血症 腹水 腹腔感染 门脉主干栓塞 重度贫血	1	1	0
1	42	1	1		0	2012-11-01	1	2	脾-膈下	1	1	0	2013-01-25	85	是			36	60	61	1846	8	6.5	200	0.8125	25	1.5	20	1	0	0	0	1	0	0	0	1（第一次胃镜）		2017-11-21	2012-11-14	2	0	0		13701118086、13681454888	1、肝炎肝硬化 活动性 失代偿期 乙型 2、食管胃底静脉曲张破裂出血组织胶+聚桂醇+套扎术后 3、低蛋白血症（27.7g/L）4、腹水 5、腹腔感染 6、胸水7、脾大脾功能亢进8、反流性食管炎9、失血性贫血 10、败血症11、双腿静脉曲张术后 12、湿疹 13、瘀滞性皮炎	1	1	0
2	49	0	0		0	2012-07-03	1	2	脾肾+脐静脉	0	0	0		1842	是			36	60	61	1842	1	0.5	40	0.5	40	0.5	40	0	1	0	0	0	0	0	0			2017-07-19	2012-07-18	1	0	0		13691117882、13901238423	肝炎肝硬化失代偿期静止性乙型 脾功能亢进 腹水 腹腔感染 上消化道出血 食管胃底静脉曲张组织胶+聚桂醇治疗后 门脉高压性胃病 食管溃疡	1	1	0
2	60	0	0		1	2012-12-23	1	1	食管旁+脐静脉	1	1	0	2013-01-16	24	是			36	60	61	1844	6	2.5	150	0.416667	25	1	10	0	1	0	0	0	0	0	0			2018-01-10	2013-01-08	1	0	0	门诊江宇泳	65366975	1、肝炎肝硬化 活动性 失代偿期 乙型 2、食道胃底静脉曲张破裂出血 3、脾功能亢进 4、腹水 5、高血压病	1	1	0
1	52	1	0		0	2013-01-08	0			0	0	0		1835		一级预防		36	60	61	1835	2	0	10	0	5	0	0	1	0	0	0	0	0	0	1	1（第一次胃镜）		2018-01-17	2013-01-14	1	0	0	门诊邢卉春	13439259945	肝炎肝硬化 活动性 失代偿期 乙型，食道静脉曲张中重度，慢性浅表性胃炎 肝内实行占位病变性质未明，肠道菌群失调，慢性咽炎	1	1	0
1	52	0	0		0	2012-11-26	0			0	0	0		1845		一级预防		36	60	61	1845	4	3	110	0.75	27.5	2.5	40	1	0	0	0	1	0	0	0	1（第一次胃镜）		2017-12-15	2012-12-20	3	0	0	门诊	13520552450、130811319246	肝炎肝硬化活动性失代偿期乙型，腹水，腹腔感染，食道胃底静脉曲张套扎硬化治疗后，脾功能亢进，低蛋白血症，胆囊结石，胆囊炎，肾囊肿，门脉高压性胃病，幽门螺杆菌感染，电解质紊乱	1	1	0
2	37	0	0		0	2012-07-18	0			1	1	0	2013-04-30	286	是			36	60	61	1848	4	3.5	110	0.875	27.5	1	40	0	1	0	0	0	0	0	0			2017-08-09	2012-07-27	2	0	0		15811432636、13691472259	食管胃底静脉曲张破裂出血 肝炎肝硬化 活动性 失代偿期 乙型 腹水 贫血	1	1	0
2	52	0	0		1	2011-09-05	0			1	1	0	2011-09-26	21	是			36	60	61	1842	2	3	30	1.5	15	2	20	0	1	0	0	0	0	0	0			2016-09-20	2011-09-23	1	0	0	好转出院	13832285998 、15176318777	肝炎肝硬化 活动性 失代偿期 乙型 上消化道出血 组织胶治疗后 失血性休克 腹水 腹腔感染 肝性脑病 心肌梗塞 肝囊肿 胸腔积液	1	1	0
1	38	0	0		0	2013-01-21	1	1	脐静脉	0	0	0		1809				36	60	60	1809	4	2.5	120	0.625	30	0.5	10	0	1	0	0	0	0	0	0			2018-01-04	2013-02-06	3	0	0	2013.3入院后予保肝、增强免疫，抗病毒治疗。3.19在胃镜下行食管胃底静脉曲张硬化剂治疗，胃镜提示：食管静脉曲张中度，胃底静脉曲张中度，聚桂醇+组织胶治疗。建议：3月后复查。术后予泮托拉唑抑酸治疗。 李明慧主任医师查房指示：患者目前无不适症状，病情好转，今日出院。出院后继续护胃抑酸治疗。出院后未出过血，病情稳定	1.39951e+21	1、肝炎肝硬化 乙型 活动性 失代偿期 2、上消化道出血	1	1	0
1	47	1	0		0	2013-01-08	1	1	脐静脉	0	0	0		1813				36	60	60	1813	1	0	40	0	40	0	40	0	0	0	1	0	0	0	0			2017-12-26	2013-01-16	1	0	0	2013.1王笑梅主任医师查房指示，患者当前肝脏病情稳定，患者食道胃底静脉曲张重度，行胃镜下治疗后建议复查，患者因经济等原因要求暂不复查，要求今日出院，已反复向其讲明可能出血等风险，患者仍坚持出院。请示上级医师指示准予出院。	1.36457e+21	1、肝炎肝硬化 活动性 失代偿期 乙型 2、腹水 3、食道胃底静脉曲张 4、脾功能亢进	1	1	0
2	42	0	0		1	2012-12-27	1	2	附脐静脉+胃左-食管下	0	0	0		1825				36	60	60	1825	4	1.5	90	0.375	22.5	1	10	1	0	0	0	1	0	0	0	1（第一次胃镜）		2017-12-26	2013-01-25	1	0	0	2013.11门诊	15048694421、13848462861	1、食道胃底静脉曲张破裂出血 2、肝炎肝硬化 活动性 失代偿期 乙型 重度 3、胃溃疡 4、甲状腺功能亢进	1	1	0
1	53	1	1		0	2013-01-06	0			0	0	0		1817				36	60	60	1817	1	1	10	1	10	1	10	0	1	0	0	0	0	0	0			2017-12-28	2013-01-29	1	0	0	2013.4患者主因发现乙肝病史21年，间断呕血、黑便3个月入院，完善检查后诊断如上。于2013-3-14行脾切除+贲门周围血管离断术+食道下段横断吻合术，术后病理提示慢性淤血性脾肿大，术后恢复顺利。张珂副主任代主治医师查房通知患者出院。	1.58332e+21	1、上消化道出血 食管胃底静脉曲张破裂出血 2、肝硬化 失代偿期 乙型 3、脾大 脾功能亢进 4、腹水 腹腔感染 5、门脉高压症 门脉主干及肠系膜上静脉部分栓塞 6、胆囊炎	1	1	0
1	52	1	1		0	2013-03-06	1	2	脐静脉+食管旁	1	0	1	2015-09-03	911		一级预防		36	59	59	1771	8	3.5	190	0.4375	23.75	0	40	0	0	0	1	0	0	0	0			2018-01-10	2013-03-29	2	0	0	门诊	1.59107e+21	1、肝炎肝硬化 活动性 失代偿期 乙型 重症肝病 2、腹水 3、低蛋白血症 4、食管静脉重度曲张 聚桂醇治疗术后 5、胃底静脉中度曲张 6、脾机能亢进 7、胃溃疡 幽门螺杆菌感染 8、慢性窦样增生性胃炎 9、肾囊肿	1	1	0
2	40	0	0		0	2013-01-28	1	2	脐静脉+附脐静脉	0	0	0		1795	是			36	59	59	1795	2	1.5	50	0.75	25	0.5	10	0	1	0	0	0	0	0	0			2017-12-28	2013-02-07	2	0	0	2013.4.9门诊	15010307683	1、上消化道出血 食管胃底静脉曲张破裂出血 聚桂醇+组织胶治疗 2、肝炎肝硬化活动性失代偿期乙型 脾大 脾亢 低蛋白血症 3、贫血 4、上呼吸道感染	1	1	0
2	49	0	0		1	2013-03-02	1	2	脾肾	0	0	0		1782	是			36	59	59	1782	6	6.5	180	1.08333	30	1.5	30	0	1	0	0	0	0	0	0			2018-01-17	2013-03-18	2	0	0	门诊	1.36932e+21	1、肝炎肝硬化 活动型 失代偿期 乙型 2、门脉高压 3、食管胃底静脉曲张破裂出血 4、贫血 5、食管胃底静脉曲张硬化治疗后 6、脾肾分流 7、门静脉主干内栓塞 8、低蛋白血症 9、腹水 10、腹腔感染 11、脾功能亢进 12、粒细胞减少 13、慢性浅表性胃炎 14、胆囊结石 15、胆囊炎 16、右侧乳腺癌根治术后	1	1	0
1	52	1	0		0	2013-02-14	0			1	0	1	2014-10-15	608	是			36	59	59	1800	6	5.5	160	0.916667	26.6667	1	40	0	1	0	0	0	0	0	0			2018-01-19	2013-02-25	2	0	0	患者精神可，食欲食量正常，无发热、腹痛、腹泻，无恶心、呕吐，二便正常，夜间睡眠可。患者肝硬化基础，腹部核磁提示肝内异常强化结节，介入科建议择期行肝动脉造影检查，患者目前血红蛋白低，待患者贫血纠正后择期行肝动脉造影检查；患者目前病情稳定，要求出院，准予今日带药出院。嘱患者不适随诊，定期门诊复查。	1.86347e+21	1、上消化道出血 2、肝炎肝硬化活动性失代偿期乙型 脾大、脾功能亢进、门脉高压症 3、食管静脉曲张重度 4、胃底静脉曲张中度 5、十二指肠球部溃疡	1	1	0
1	38	1	1		1	2012-07-24	0			0	0	0		1765	是			36	58	58	1765	1	2	10	2	10	2	10	0	1	0	0	0	0	0	0			2017-05-24	2012-09-03	1	0	0	门诊	13910428324	肝炎后肝硬化活动性失代偿期 乙型 门静脉高压症 脾大脾亢 脾周围炎 食道胃底静脉曲张破裂出血 胃溃疡A1期	1	1	0
1	33	0	0		0	2013-03-02	0			1	1	0	2013-09-27	209	是			36	58	58	1755	9	11	240	1.22222	26.6667	3	20	0	1	0	0	0	0	0	0			2017-12-21	2013-03-28	1	0	0		1.39119e+21	肝炎肝硬化 活动性 失代偿期 乙型、食道胃底静脉曲张破裂出血、失血性贫血、脾功能亢进、粒细胞缺乏、腹水、腹腔感染；艾滋病、肺部感染、双侧胸水。	1	1	0
1	27	0	1		0	2012-11-21	0			1	1	0	2013-03-11	110	是			36	58	58	1770	5	3.5	160	0.7	32	1	40	0	1	0	0	0	0	0	0			2017-09-26	2012-12-10	2	0	0	予行胃镜下治疗、止血、降门脉压、抑制胃酸保护胃黏膜、输注同型红细胞、血浆、人血白蛋白，扩容补液利尿、抗感染、抗病毒、减轻肝脏炎症反应、调节免疫、清除氧自由基等治疗。目前出血止住，病情尚稳定，但胃镜治疗术后未满一周，消化道出血风险高，且抗生素疗程不足，建议继续住院治疗，患者仍要求今日暂出院，劝说无效，予办理今日出院。	13935549362、15699975987	1、肝炎肝硬化 活动性 失代偿期 乙型 2、食管静脉曲张重度 胃底静脉曲张中度硬化剂治疗后 3、中度贫血（Hb90g/L)	1	1	0
1	53	1	0		1	2012-11-06	1	1	门脉右支-下腔	1	1	0	2013-08-17	284	是			36	57	57	1731	7	10.5	110	1.5	15.7143	1	10	0	1	0	0	0	0	0	0			2017-08-03	2012-11-21	1	0	0	患者主因发现HBsAg（+）6年余，发现肝占位2年，尿黄，重度乏力，腹胀1月余入院，神志清楚，肝病面容，全身皮肤黏膜颜色重度黄染，肝掌阳性，蜘蛛痣可疑，双侧巩膜重度黄染，睑结膜苍白，双肺呼吸音粗，可闻及少量干湿啰音，心率78次/分，心律齐，腹部膨隆，移动性浊音阳性。双下肢无水肿，踝阵挛阴性，扑翼样震颤阳性，Kernig征阴性，Brudzinski征阴性。入院后予保肝，抗感染，利尿消肿，间断放腹水等治疗。家属要求今日自动出院。	15931095158	1、肝炎肝硬化 活动性 失代偿期 乙型 2、上消化道出血 3、食道胃底静脉曲张破裂出血 4、低蛋白血症 5、腹水 6、腹腔感染 7、肝性脑病 8、脾功能亢进 9、失血性贫血 10、2型糖尿病	1	1	0
1	61	0	1		0	2013-02-15	1	2	脾肾	1	1	0	2013-08-24	190	是			36	57	57	1740	1	4.5	20	4.5	20	4.5	20	0	1	0	0	0	0	0	0			2017-11-21	2013-03-04	1	0	0	门诊	1.37012e+18	1、肝炎肝硬化 乙型 活动性 失代偿期 2、食道胃底静脉曲张破裂出血 3、高血压病 4、慢性阻塞性肺疾病 5、右股骨头结核术后 6、右侧肺炎 7、腹水 8、低蛋白血症 9、胃溃疡出血	1	1	0
1	34	1	1		1	2013-01-16	0			0	0	0		1711		是		36	57	57	1711	4	4	100	1	25	1.5	30	0	1	0	0	0	0	0	0			2017-09-23	2013-01-30	1	0	0	患者主因“发现HBsAg阳性17年余，发现肝占位3天”入院，入院后完善相关检查，血液检查提示： 甲胎蛋白(稀释) AFP 21791.8ng/ml， AST 58.7U/L，TBIL 22.3umol/L，DBIL 8.0umol/L，LDH 259.7U/L，GGT 64.7U/L，CK 47.8U/L。给予保肝、降黄、中药抗肿瘤等对症治疗。患者因回当地医院继续治疗，自动要求出院，给予办理。	1.8957e+21	1、肝炎肝硬化 活动性 失代偿期 乙型 2、腹水 腹腔感染 3、食管胃底静脉曲张 4、脾大 5、脾亢 6、贫血 7、反流性食管炎 8、低蛋白血症 9、肝囊肿	1	1	0
1	55	1	1		0	2013-03-06	0			1	1	0	2013-08-10	157	是			36	57	57	1725	4	3	120	0.75	30	1	10	0	1	0	0	0	0	0	0			2017-11-25	2013-04-08	3	0	0	门诊	15901395686	1、上消化道出血 2、贫血 3、胃镜下硬化剂治疗术后 4、重度胃底排胶溃疡 5、肝炎肝硬化 活动性 失代偿期 乙型 6、胆汁淤积 7、腹水 腹腔感染 8、脾大、脾亢 9、低蛋白血症	1	1	0
2	62	0	0		0	2013-04-10	0			0	0	0		1718				36	57	57	1718	1	1	40	1	40	1	40	0	1	0	0	0	0	0	0			2017-12-23	2013-04-22	1	0	0	肝功能稳定，要求出院，请示于浩主治医师后准予今日带药出院。最近1年发现肝癌，肺转移	15041664856	1、 上消化道出血、食管胃底静脉曲张破裂出血硬化治疗后 3、肝炎肝硬化活动性失代偿期乙型 脾大、脾功能亢进、腹水 4、慢性浅表性胃炎5、2型糖尿病	1	1	0
2	69	0	0		1	2013-03-28	0			0	0	0		1731				36	57	57	1731	2	2.5	50	1.25	25	2.5	10	0	1	0	0	0	0	0	0			2017-12-23	2013-04-08	2	0	0	2013目前患者出血停止，贫血较前纠正，一般情况较稳定，安排好转出院。	13051952882	1、上消化道出血 2、食管胃底静脉曲张破裂出血 3、失血性休克 4、重度贫血 5、肝炎肝硬化 活动性 失代偿期 乙型 6、低蛋白血症 7、腹水 8、腹腔感染 9、支气管炎	1	1	0
1	52	1	0		1	2013-03-06	1	1	脐静脉	0	0	0		1684	是			36	56	56	1684	4	1.5	80	0.375	20	0.5	10	0	1	0	0	0	0	0	0			2017-10-15	2013-03-15	2	0	0		15901482831	上消化道出血 食管胃底静脉曲张破裂出血 中度贫血 肝炎肝硬化 活动性 失代偿期 乙型 腹水 低蛋白血症	1	1	0
1	44	1	1		1	2013-04-16	0			0	0	0		1704	是			36	56	56	1704	1	2	40	2	40	2	40	0	1	0	0	0	0	0	0			2017-12-15	2013-06-03	1	0	0		1.3161e+21	1、乙型肝炎后肝硬化；2、病毒性肝炎 乙型 慢性；3、肝功能异常合并低蛋白血症；4、乙型肝炎后肝硬化合并门静脉高压症；5、门静脉高压症：食道胃底曲张静脉破裂出血、脾脏肿大伴功能亢进、腹水、门脉高压性胃病；6、失血性贫血（重度）	1	1	0
1	62	0	0		0	2013-03-12	0			1	1	0	2014-01-07	301	是			36	56	56	1709	9	11.5	240	1.27778	26.6667	0.5	10	1	0	0	0	1	0	0	0	1（第一次胃镜）		2017-11-15	2013-04-01	2	0	0	门诊	1.57272e+21	1、肝炎肝硬化 活动性 失代偿期 乙型 2、腹水 3、腹腔感染 4、脾大 5、脾功能亢进 6、食道胃底静脉曲张破裂出血 7、高血压病 8、低钾血症	1	1	0
2	61	0	0		0	2013-04-25	0			0	0	0		1703				36	56	56	1703	2	0	80	0	40	0	40	0	0	0	1	0	0	0	0			2017-12-23	2013-05-06	2	0	0	2013.6门诊李鑫	13363208085	1、肝炎肝硬化 活动性 失代偿期 乙型 2、腹水 3、腹腔感染 4、食道静脉曲张重度 5、脾大 6、脾功能亢进 7、肺部感染 8、2型糖尿病 9、高血压病2级 10、高脂血症 11、门脉高压性胃病 12、贫血	1	1	0
1	44	0	0		1	2013-04-10	1	2	脾肾	0	0	0		1673	是			36	55	55	1673	7	4.5	140	0.642857	20	1	20	0	1	0	0	0	0	0	0			2017-11-08	2013-04-28	3	0	0	门诊梁秀霞	1.38113e+21	1、上消化道大出血 食管胃底静脉曲张破裂出血 聚桂醇+组织胶治疗 2、肝炎肝硬化 活动性 失代偿期 乙型 3、脾大 脾功能亢进 3、腹水 4、胃溃疡 5、胆囊炎 6、癫痫	1	1	0
1	64	0	0		0	2013-06-17	1	2	脾肾	0	0	0		1654	是			36	55	55	1654	5	3.5	180	0.7	36	1.5	40	0	1	0	0	0	0	0	0			2017-12-27	2013-07-01	2	0	0		1.35224e+21	1、慢性肝衰竭 2、肝炎肝硬化 活动性 失代偿期 乙型 3、消化道出血 4、食道胃底静脉曲张破裂出血 5、脾功能亢进 6、贫血	1	1	0
1	41	0	0		0	2013-05-08	1	2	门脉-下腔	1	1	0	2013-05-24	16		是		36	55	55	1654	5	3	170	0.6	34	1.5	30	1	0	0	0	1	0	0	0	1（第一次胃镜）		2017-11-17	2013-05-18	2	0	0		13716387753	1、包皮过长2、肝炎肝硬化 活动性 代偿期 乙型 3、门脉高压症 4、食道胃底曲张重度 5、脾功能亢进 6、幽门螺旋杆菌感染 7、HBV耐药 8、反流性食管炎 9、高血压	1	1	0
1	43	1	0		0	2013-06-04	0			1	0	1	2015-08-20	807	是			36	55	55	1675	4	3	130	0.75	32.5	1	30	0	1	0	0	0	0	0	0			2018-01-04	2013-06-11	2	0	0	2015.8患者病情稳定，入院后给予对症保肝、止血、支持治疗准予出院。。出院后未出血过，现病情平稳	18613872265，13012000986无人接听	1、食管胃底静脉曲张破裂出血 2、肝硬化 失代偿期 乙型	1	1	0
1	47	1	0		0	2013-06-07	0			1	0	1	2015-07-29	782	是			36	55	55	1665	2	0.5	40	0.25	20	0.5	10	0	1	0	0	0	0	0	0			2017-12-28	2013-06-18	2	0	0	2015.12门诊	13501221320不方便接听，短信，13784061275无人接听	1、肝炎肝硬化 活动性 失代偿期 乙型 2、食道胃底静脉曲张破裂出血 3、腹水 4、腹水感染 5、重症肝病	1	1	0
1	34	1	0		0	2013-04-17	0			1	1	0	2014-02-20	309	是			36	55	55	1666	8	7	200	0.875	25	0.5	40	0	1	0	0	0	0	0	0			2017-11-08	2013-05-13	2	0	0	门诊	13621305125	1、食管胃底静脉曲张破裂出血 2、慢加急肝衰竭 3、肝炎肝硬化伴胆汁淤积 活动性 失代偿期 乙型 4、低蛋白血症（ALB 24.6g/L） 5、肝性脑病 6、腹水 腹腔感染 7、脾大 脾功能亢进 8、贫血（HGB 79g/L） 9、胃溃疡 10、肝囊肿 11、糖尿病	1	1	0
1	62	0	0		0	2013-05-30	1	1	脾肾	0	0	0		1638	是			36	54	54	1638	6	2	150	0.333333	25	1.5	20	0	1	0	0	0	0	0	0			2017-11-23	2013-06-17	2	0	0	门诊梁秀霞	1.35217e+21	1、食管胃底静脉曲张破裂出血 3、肝炎肝硬化活动性失代偿期乙型 4、腹水 腹腔感染 5、低蛋白血症 6、贫血	1	1	0
1	57	1	1		0	2012-12-30	1	1	脐静脉	1	1	0	2013-11-06	311	是			36	54	54	1640	5	2	120	0.4	24	1	10	0	1	0	0	0	0	0	0			2017-06-27	2013-01-14	4	0	0	急诊	1.36413e+21	1、肝炎肝硬化活动性失代偿期乙型 2、上消化道出血 食管胃底静脉曲张破裂出血 聚桂醇+组织胶治疗 3、脾大、脾亢 4、腹水 5、低蛋白血症 6、潜伏梅毒 7、贫血 8、门脉高压性胃病 9、反流性食管炎	1	1	0
2	63	0	0		1	2013-04-21	1	1	脐静脉	0	0	0		1623	是			36	54	54	1623	6	3.5	130	0.583333	21.6667	0.5	10	0	1	0	0	0	0	0	0			2017-09-30	2013-05-02	2	0	0	目前腹胀好转，无发热、腹痛等不适，请示李坪主任医师，今日出院。	1.36916e+21	1、上消化道出血 食管胃底静脉曲张破裂出血 2、肝炎肝硬化活动性失代偿期乙型 腹水 脾大 脾亢 3、贫血 4、高血压 5、胆囊结石 6、腔隙性脑梗塞 7、右眼视网膜中央动脉阻塞 8、双眼老年性白内障	1	1	0
1	45	0	0		0	2013-07-25	0			0	0	0		1624				36	54	54	1624	2	2.5	40	1.25	20	1.5	20	0	1	0	0	0	0	0	0	1		2018-01-04	2013-08-08	3	0	0	2013.8胃镜：食管静脉曲张重度 胃底静脉治疗后改变 套扎+硬化+栓塞治疗。患者门脉高压、脾功能亢进明显，请介入科会诊：建议择期可行脾部分栓塞治疗，外一科会诊：建议可转外科行脾切断流术。出院后当地医院行脾切除，后未出血过，目前病情平稳	18232577806空号，15031886255	1、肝炎肝硬化活动性失代偿期乙型 2、食道胃底静脉曲张破裂出血 3、组织胶+聚桂醇+套扎治疗 4、腹水 5、低蛋白血症 6、脾功能亢进 7、2型糖尿病 8、贫血	1	1	0
1	27	0	0		0	2013-06-07	0			0	0	0		1645	是			36	54	54	1645	1	0.5	10	0.5	10	0.5	10	0	1	0	0	0	0	0	0			2017-12-08	2013-06-14	1	0	0	门诊	1.37169e+21	1、肝炎肝硬化 活动性 失代偿期 乙型 2、胃底静脉曲张破裂出血 3、脾功能亢进 4、十二指肠溃疡 5、胆囊结石	1	1	0
1	51	0	0		0	2013-06-14	0			0	0	0		1625	是			36	54	54	1625	5	2	110	0.4	22	1	40	0	1	0	0	0	0	0	0			2017-11-25	2013-06-28	2	0	0	门诊	1.33011e+21	、肝炎肝硬化 乙型 活动性 失代偿期 2、食道胃底静脉曲张硬化治疗 3、食道排胶溃疡 4、肝血管瘤 5、腹水	1	1	0
2	30	0	0		0	2013-07-25	1	2	脾肾	1	0	1	2016-11-30	1224	是			36	53	53	1592	4	7	150	1.75	37.5	2	40	0	1	0	0	0	0	0	0			2017-12-03	2013-08-09	2	0	0	门诊	1.34887e+21	1、上消化道出血 2、胃底静脉破裂出血 3、食道胃底静脉曲张硬化治疗后 4、贫血 5、肝炎肝硬化 活动性 失代偿期 乙型 6、脾功能亢进 7、腹水 8、胆囊炎 9、肾囊肿	1	1	0
2	46	0	0		0	2012-12-17	0			0	0	0		1614	是			36	53	53	1614	2	1.5	60	0.75	30	1	20	1	0	0	0	1	0	0	0	1（第一次胃镜）		2017-05-19	2013-01-07	2	0	0	门诊周桂琴	13717968761关机	1、上消化道出血 2、肝炎肝硬化 活动性 失代偿期 乙型 3、食道胃底静脉曲张破裂 4、脾大 脾功能亢进 5、慢性浅表性胃炎 6、上呼吸道感染 7、腹水	1	1	0
2	62	1	0		1	2013-08-12	1	1	脐静脉	0	0	0		1578	是			36	52	52	1578	3	2	80	0.666667	26.6667	1	20	0	1	0	0	0	0	0	0			2017-12-07	2013-08-26	2	0	0		8.43332e+18	1、上消化道出血 2、食管胃底静脉曲张破裂出血 3、胃多发溃疡（A2期）4、贫血 5、肝炎肝硬化活动性失代偿期乙型 6、脾大 7、腹水 8、布-加综合症不除外 9、腰椎管狭窄	1	1	0
2	52	0	0		1	2013-08-17	0			0	0	0		1578	是			36	52	52	1578	1	3.5	10	3.5	10	3.5	10	0	1	0	0	0	0	0	0			2017-12-12	2013-09-12	1	0	0	好转出院	"13910826591,13693075297"	1、肝炎肝硬化 活动性 失代偿期 乙型 2、上消化道出血 3、食道胃底静脉曲张破裂出血 4、腹水 腹腔感染 5、低蛋白血症 6、脾大 7、脾功能亢进	1	1	0
1	53	0	0		0	2013-09-24	1	2	脾肾	1	0	1	2014-10-23	394		是		36	51	51	1539	3	3.5	60	1.16667	20	1.5	40	0	1	0	0	0	0	0	0			2017-12-11	2013-09-29	1	0	0	门诊	"13801073073,13811200339"	1、肝炎肝硬化 活动性 失代偿期 乙型 2、食道胃底静脉曲张 3、静脉曲张套扎硬化治疗后 4、高血压病2级 高危组	1	1	0
1	42	0	1		0	2010-03-30	1	2	脾肾	0	0	0		1536	是			36	51	51	1536	2	1.5	70	0.75	35	1	50	0	1	0	0	0	0	0	0			2014-06-13	2010-04-20	2	0	0	患者6-13 5：50pm左右患者突然出现意识丧失、血压下降，叹气样呼吸。心电监护示：心率78次/分，呼吸26次/分，血压65/36mmHg，血氧饱和度78%。家属经慎重考虑，决定自动出院。请患者爱人及儿子签署知情同意书。嘱患者家属路途注意患者安全。	18903263061、13832600500	肝炎肝硬化活动性失代偿期乙型 上消化道出血 食管胃底静脉曲张硬化术后 失血性贫血 脾功能亢进 低蛋白血症 门脉高压性胃病 腹水 2型糖尿病	1	1	0
1	43	0	0		0	2013-10-14	0			0	0	0		1544				36	51	51	1544	1	2.5	50	2.5	50	2.5	50	0	1	0	0	0	0	0	0			2018-01-05	2013-10-23	1	0	0	2013.10考虑肝内占位考虑肝转移癌可能性大，原发灶尚不明确，建议尽快行结肠镜检查以除外肠道恶性肿瘤，患者及家属拒绝行肠镜检查和胃镜下治疗，今日强烈要求出院，劝说无效，李明慧主任医师指示签字后办理出院手续。 出院后至第四军医大检查，做了肝穿，患者自诉不是肝硬化，当地大夫建议每两个月复查一次，一直情况稳定。	13279102777，，13629185699	1、肝炎肝硬化 失代偿期 乙型 2、肝内多发占位：转移癌可能性大 3、食管胃底静脉曲张（重度）4、慢性胆囊炎并胆系感染 5、败血症 6、2型糖尿病	1	1	0
1	43	0	0		0	2013-09-05	0			0	0	0		1547		一级预防		36	51	51	1547	2	2	70	1	35	1	40	0	1	0	0	0	0	0	0			2017-11-30	2013-09-22	1	0	0	患者病情较前明显好转	13563726573	1、肝炎肝硬化 活动性 失代偿期 乙型 2、食道胃底静脉曲张硬化剂术后 3、功能亢进 4、肝肾综合征 5、新型隐球菌脑膜炎 6、视力 听力损害 7、腰椎骨折术后 8、马尾神经受损 9、腔隙性脑梗死	1	1	0
1	53	0	0		0	2013-09-17	0			0	0	0		1554				36	51	51	1554	2	1.5	60	0.75	30	1.5	30	1	0	0	0	1	0	0	0	1（第一次胃镜）		2017-12-19	2013-09-22	2	0	0	好转出院	1.39481e+21	1、肝炎肝硬化 活动性 失代偿期 乙型 2、食管胃底静脉曲张 3、脾功能亢进 4、门脉高压性胃病 5、2型糖尿病 6、亚临床甲减	1	1	0
2	73	0	0		0	2009-04-13	0			1	0	1	2010-05-19	401	是			36	51	51	1536	5	3	90	0.6	18	0.5	0	1	0	0	0	0	1	0	0	1（第一次胃镜）		2013-06-27	2009-04-29	2	0	0	患者目前一般情况较差，凝血功能极差，有消化道出血史，再次向家属讲明病情，病情重，预后差，随时可能因多脏器衰竭而导致死亡，家属表示理解。给予胃肠减压，加用头孢塞肟舒巴坦抗感染治疗；继续给予禁食水、灌肠、补液等治疗，患者恶心症状缓解，仍诉间断腹痛，于6月27日中午排出红色血便，量约100ml。考虑下消化道出血 肠出血可能。给予积极止血治疗，复查血常规： WBC 10.42*10~9/L，HGB 41.20g/L，PLT 69.40*10~9/L。向血库申请同型血，暂缺。患者家属要求自动出院。请示上级大夫，同意其签字后自动出院。	13901315729	1、肝炎后肝硬化 活动性 失代偿期 乙型 2、腹水 3、食道静脉套扎治疗术后 4、胃底静脉硬化术后 5、门脉高压性胃病	1	1	0
2	48	0	0		0	2013-10-15	0			0	0	0		1540		是		36	51	51	1540	1	4.5	20	4.5	20	4.5	20	0	1	0	0	0	0	0	0			2018-01-02	2013-10-22	1	0	0	2016.3门诊，病情一直稳定	13331721787空号，13394412666	1、肝炎肝硬化 活动性 失代偿期 乙型 2、胃底静脉曲张重度 3、脾大	1	1	0
2	51	0	0		0	2013-09-24	0			0	0	0		1556		一级预防		36	51	51	1556	2	1	50	0.5	25	1	40	0	1	0	0	0	0	0	0			2017-12-28	2013-10-08	1	0	0	2017.5入院予以保肝支持及抗肿瘤治疗，病人及家属要求先行出院，经上级医师批准后通知病人出院。	13904707416	1、肝炎肝硬化 活动性 失代偿期 乙型 2、肝性脑病？ 3、低蛋白血症？ 4、食道胃底静脉曲张 5、门脉高压性胃病 6、脾大、脾功能亢进 7、十二指肠球部溃疡 8、非萎缩性胃炎 9、反流性食管炎 10、胆囊炎 11、肝豆状核变性不除外 12、右侧间位结肠 13、甲状腺激素降低	1	1	0
1	43	0	0		0	2013-10-13	1	2	脾肾+脐静脉	0	0	0		1525	是			36	50	50	1525	2	1.5	50	0.75	25	0.5	10	0	1	0	0	0	0	0	0			2017-12-16	2013-10-26	2	0	0	门诊	80344098	1、肝炎肝硬化 活动性 失代偿期 乙型 2、食道胃底静脉曲张破裂出血 3、脾功能亢进 4、低蛋白血症 5、腹水 6、腹腔感染 7、重度贫血	1	1	0
1	29	0	1		0	2013-09-17	1	1	脐静脉	1	1	0	2014-08-26	343	是			36	50	50	1527	3	4.5	70	1.5	23.3333	1.5	10	1	0	0	0	1	0	0	0	1（第一次胃镜）		2017-11-22	2013-09-26	2	0	0	门诊	18201563496	1、肝炎肝硬化 活动性 失代偿期 乙型 2、食道胃底静脉曲张破裂出血 3、低蛋白血症 4、腹水 5、腹腔感染 6、脾功能亢进	1	1	0
1	49	0	0		1	2013-08-25	0			1	0	1	2015-08-28	733		是		36	50	50	1524	9	11.5	250	1.27778	27.7778	1	40	0	1	0	0	0	0	0	0			2017-10-27	2013-08-28	1	0	0	介入治疗。患者精神食欲有好转，李明慧主任指示病情好转予出院。	18801353376	1、肝炎肝硬化 失代偿期 活动性 乙型 2、食管胃底静脉曲张 3、2型糖尿病 4、急性上呼吸道感染	1	1	0
1	46	0	0		0	2013-04-22	0			1	0	1	2014-10-06	532	是			36	50	50	1506	8	12.5	200	1.5625	25	0.5	10	0	1	0	0	0	0	0	0			2017-06-06	2013-05-15	3	0	0	已故	13910917209	1、肝炎肝硬化 活动性 失代偿期 乙型 上消化道出血 腹水 慢性胆囊炎急性发病 门脉高压 食道溃疡	1	1	0
2	59	0	0		0	2013-10-23	0			0	0	0		1524	是			36	50	50	1524	8	8	190	1	23.75	1	0	0	0	1	0	0	0	0	0			2017-12-25	2013-11-12	3	0	0	2015.12患者胃镜治疗后无明显不适，但未满1周，要求出院，请示李明慧主任医师，允许签字出院。	1.3811e+21	1、肝炎肝硬化 失代偿期 乙型 2、腹水 腹腔感染 3、胆囊多发结石 胆系感染 4、食道胃底静脉曲张（重度）5、脾大 脾功能亢进 6、肝多发囊肿	1	1	0
2	49	0	0		1	2013-10-18	0			1	1	0	2014-03-25	158	是			36	50	50	1510	6	10.5	130	1.75	21.6667	2	10	0	1	0	0	0	0	0	0			2017-12-06	2013-10-31	2	0	0	门诊	6.15979e+18	1、肝硬化伴有食管静脉曲张破裂出血 2、肝炎肝硬化 活动性 失代偿期 乙型 3、脾大 脾亢 4、失血性贫血 5、低钾血症 6、反流性食管炎 7、高血压	1	1	0
2	30	0	0		0	2013-10-30	0			1	1	0	2014-01-02	64	是			36	50	50	1515	3	3	60	1	20	1	10	0	1	0	0	0	0	0	0			2017-12-23	2013-11-22	1	0	0	2015.7门诊谢雯	1.3553e+21	门脉高压症 食管胃底静脉曲张破裂出血 失血性贫血 脾大伴脾功能亢进 肝炎后肝硬化乙型 十二指肠溃疡	1	1	0
2	66	0	0		0	2013-10-20	0			1	1	0	2013-12-21	62	是			36	50	50	1503	11	12	240	1.09091	21.8182	1	20	0	1	0	0	0	0	0	0			2017-12-01	2013-11-01	2	0	0	胃镜:食管胃底静脉曲张治疗术后，1年后复查。给予保肝、抑酸及增强免疫力治疗，病情好转出院。	1.3501e+21	肝硬化伴食管胃底静脉曲张破裂出血 肝炎肝硬化活动性失代偿期乙型 腹水 腹腔感染 低蛋白血症（25.3g/L） 反流性食管炎 贫血 冠心病 高血压 2型糖尿病 陈旧性脑梗死	1	1	0
1	44	0	1		1	2013-12-03	1	2	门脉右支-下腔+脾肾	0	0	0		1491				36	49	49	1491	4	9	100	2.25	25	5	10	0	1	0	0	0	0	0	0			2018-01-02	2013-12-12	2	0	0	2014.7患者主因发现HBsAg阳性18年，间断黑便7月入院，胃镜:食道胃底静脉曲张治疗后改变，胃底静脉曲张中度，组织胶+聚桂醇治疗3个月后复查。给予保肝、降酶、调节免疫力、抗病毒等治疗，患者病情相对平稳，予以出院。	13601182840，13241637265	1、肝硬化伴食道胃底静脉曲张破裂出血 3、肝炎肝硬化 活动性 失代偿期 乙型 4、脾大 脾亢 5、腹水 6、肺炎 7、营养不良性贫血 8、低钾血症 9、反流性食管炎 10、白细胞减少 11、胆囊炎 12、2型糖尿病	1	1	0
1	42	1	0		1	2013-11-28	1	2	脾肾	1	1	0	2014-01-01	34	是			36	49	49	1482	7	11.5	250	1.64286	35.7143	2	10	0	1	0	0	0	0	0	0			2017-12-19	2013-12-19	2	0	0	门诊	1.38013e+21	1、上消化道出血 2、食道胃底静脉曲张破裂 3、肝炎肝硬化 活动性 失代偿期 乙型 5、腹水 腹腔感染 6、脾大 7、脂肪肝 8、肝占位性病变	1	1	0
2	63	0	0		0	2013-12-07	1	1	脐静脉	0	0	0		1477	是			36	49	49	1477	1	1	20	1	20	1	20	0	1	0	0	0	0	0	0			2017-12-23	2013-12-31	1	0	0	2015门诊谢雯，后来做了肝移植	1.59401e+21	1、上消化道出血 食管胃底静脉曲张破裂出血 失血性休克 失血性贫血 胃镜下组织胶聚桂醇治疗术后；2、肝炎肝硬化 活动性 失代偿期 乙型 腹水 腹腔感染 胸腔积液 低蛋白血症（ALB 29.4g/L） 脾大；3、肝囊肿	1	1	0
1	59	0	0		0	2011-05-08	0			0	0	0		1485	是			36	49	49	1485	3	1	90	0.333333	30	1	40	1	0	0	0	1	0	0	0	1（第一次胃镜）		2015-06-01	2011-05-13	2	0	0	2014.10出院，2015.6去世	18654337955 、13910800199	1、肝炎肝硬化 活动性 失代偿期 乙型 2、上消化道出血 3.食管静脉曲张	1	1	0
1	50	0	0		0	2013-03-19	0			0	0	0		1472	是			36	49	49	1472	2	2.5	70	1.25	35	2.5	50	0	1	0	0	0	0	0	0			2017-03-30	2013-03-21	1	0	0	患者无呕血及黑便，饮食睡眠尚可，二便正常。查体：皮肤巩膜无黄染，心肺听诊未见明显异常，腹软，无压痛及反跳痛，移动性浊音阴性，肠鸣音正常，双下肢无浮肿。李明慧主任医师查房嘱：患者病情平稳，今日出院，定期复查，不适随诊。	15613465210	1、肝炎肝硬化 代偿期 乙型 2、肝血管瘤 3.食管胃底静脉曲张硬化治疗术后	1	1	0
1	45	1	1		0	2013-12-04	0			0	0	0		1482				36	49	49	1482	3	1.5	90	0.5	30	0.5	10	0	1	0	0	0	0	0	0			2017-12-25	2013-12-13	2	0	0	2014.1行胃镜检查提示食道静脉曲张中度胃底静脉曲张治疗后改变聚桂醇治疗，术后患者无特殊不适，安排好转出院。2017.4脾切，病情平稳	"13521664508打错,18729983194"	1、肝硬化伴食道胃底静脉曲张破裂出血 3、肝炎肝硬化 活动性 失代偿期 乙型 4、脾大 脾亢 5、腹水 6、营养不良性贫血 7、低蛋白血症 8、反流性食管炎 9、慢性胆囊炎	1	1	0
1	54	0	0		0	2013-09-20	0			0	0	0		1484		是		36	49	49	1484	5	1.5	110	0.3	22	0.5	10	1	0	0	0	1	0	0	0	1（第一次胃镜）		2017-10-13	2013-10-09	3	0	0	患者重度肝衰竭，重度黄疸，PTA低下，低蛋白血症，严重低钾血症，均提示肝功能衰竭患者。路遥主治医师指示患者慢乙肝，自行停用抗病毒治疗，目前慢重肝，肝衰竭，病情危重，向家属交待病情，表示理解。 腹部CT平扫+增强-B诊断意见:1.肝右叶占位性病变，考虑恶性肿瘤可能，请复查；2.肝硬化、脾大、食管下段及胃底静脉曲张，门静脉主干部分栓塞；脾门血管局限性膨隆，动脉瘤？3.肝脏多发一过性灌注异常，请随诊；4.肝多发囊肿。5.胆囊壁水肿增厚，胆囊炎。 肝、胆、脾、胰、肾、腹水、腹腔淋巴结诊断意见:肝内实性占位，肝Ca？肝硬化脾大肝囊肿门脉主干部分栓塞胆囊增大壁毛糙，予润众抗病毒治疗，予人血白蛋白纠正低蛋白血症，予血浆抢救肝衰竭，患者黄疸逐渐下降，精神食欲有好转，要求好转出院，已签字，予病情好转出院。	15104292718	1、肝炎肝硬化 乙型 活动性 失代偿期 2、脾功能能亢进 3、腹水 4、胃镜下硬化剂及套扎治疗	1	1	0
1	47	0	0		0	2013-11-24	0			1	1	0	2014-02-14	82	是			36	49	49	1488	5	5	140	1	28	2	10	0	1	0	0	0	0	0	0			2017-12-21	2013-12-05	2	0	0		13401071677	1、肝硬化食道胃底曲张静脉破裂出血2、肝炎肝硬化 活动性 失代偿期 乙型3、脾大4、胃溃疡5、贫血6、胆囊炎	1	1	0
1	41	0	0		0	2013-07-29	0			1	1	0	2013-10-04	67	是			36	49	49	1482	6	5.5	210	0.916667	35	1	40	0	1	0	0	0	0	0	0			2017-08-19	2013-08-12	2	0	0	予止血、降门脉压、抑酸护胃、抗病毒、保肝抗炎、抗氧自由基、调节免疫等治疗。目前已行胃镜下止血治疗，出血止住，大便颜色转黄，无活动性出血表现，考虑病情稳定，今日临床好转出院。	13436878519	肝炎肝硬化 失代偿期 活动性 乙型 重度肝损害 食道静脉曲张破裂出血 食道出血性溃疡 腹腔感染 腹水	1	1	0
1	50	0	0		0	2013-11-29	0			1	1	0	2014-01-01	33	是			36	49	49	1481	3	6.5	60	2.16667	20	4	20	0	1	0	0	0	0	0	0			2017-12-19	2013-12-11	2	0	0	2015门诊肝病	1.57114e+21	1、食管胃底静脉曲张破裂出血 2、乙肝肝硬化 活动性 失代偿期 3、脾大 脾功能亢进 4、贫血 5、腹腔积液 腹腔感染 6、胃溃疡	1	1	0
2	46	0	0		1	2013-11-07	0			1	1	0	2014-07-09	244	是			36	49	49	1493	4	4.5	60	1.125	15	2.5	20	0	1	0	0	0	0	0	0			2017-12-09	2013-11-26	1	0	0	门诊	1.35111e+21	1、肝炎肝硬化 活动性 失代偿期 乙型 2、食道胃底静脉曲张破裂出血 3、低蛋白血症 4、腹水 腹腔感染 5、脾功能亢进 6、失血性贫血	1	1	0
2	55	1	0		0	2013-03-29	0			1	1	0	2013-05-14	46	是			36	49	49	1487	3	2.5	10	0.833333	3.33333	1	10	0	1	0	0	0	0	0	0			2017-04-24	2013-04-09	1	0	0	患者上消化道出血停止。患者于4月22日要求外院继续治疗。黄容海主任医师查房，同意患者今日出院。	"13910025090,13810969583"	1、上消化道出血 2、食道胃底静脉曲张破裂出血 3、肝炎肝硬化 活动性 失代偿期 乙型 4、腹水 5、腹腔感染 6、脾大、、低蛋白血症、脾功能亢进 7、2型糖尿病	1	1	0
1	38	0	0		1	2013-11-10	1	2	脾肾+附脐静脉	1	0	1	2015-05-25	561	是			36	48	48	1453	3	6.5	30	2.16667	10	1.5	10	0	1	0	0	0	0	0	0	1		2017-11-02	2013-11-15	1	0	0	患者无不适主诉，精神、饮食、睡眠可，大小便正常。	13521912838	食道胃底静脉曲张破裂出血 肝炎肝硬化活动性失代偿期乙型 腹水 低蛋白血症 脾功能亢进	1	1	0
1	50	1	0		1	2013-12-18	1	1	脐静脉	1	1	0	2014-09-02	258	是			36	48	48	1466	6	6	140	1	23.3333	1.5	20	0	1	0	0	0	0	0	0			2017-12-23	2014-01-03	6	0	0	2016.7现病情平稳，予带药出院。	15810923961	1、肝硬化伴食管胃底静脉曲张破裂出血 2、肝炎肝硬化 活动性 失代偿期 乙型 3、贫血 营养性贫血 缺铁性贫血 4、腹水 5、低蛋白血症 6、消化性溃疡 7、低钾血症 8、低钙血症 9、腹泻 10、混合痔伴出血	1	1	0
1	36	0	1		0	2013-12-29	1	1	脐静脉	1	1	0	2014-05-05	127	是			36	48	48	1449	2	3	10	1.5	5	2.5	10	0	1	0	0	0	0	0	0			2017-12-17	2014-01-09	1	0	0		13581507193	上消化道大出血；胃底静脉曲张破裂岀血；失血性休克；失血性贫血；肝炎肝硬化，活动性，失代偿期，乙型；肺部感染；白塞氏病；胃底溃疡；慢性浅表性胃炎；低钾血症；糖耐量异常	1	1	0
1	61	0	0		0	2013-09-02	1	1	脾肾	1	1	0	2013-10-28	56	是			36	48	48	1447	9	9.5	220	1.05556	24.4444	1	10	0	1	0	0	0	0	0	0			2017-08-19	2013-09-18	3	0	0	急诊	1.55317e+21	1、肝硬化伴食管胃底静脉曲张破裂出血 2、肝炎肝硬化 活动性 失代偿期 乙型 3、腹水 腹腔感染 4、贫血 5、肠道菌群失调 6、胃溃疡	1	1	0
2	45	0	0		0	2013-08-07	1	2	脾肾	0	0	0		1456	是			36	48	48	1456	4	2	90	0.5	22.5	0.5	10	0	1	0	0	0	0	0	0			2017-08-02	2013-08-26	3	0	0	好转出院	13910060945	1、上消化道出血 食道胃底静脉曲张2、肝炎肝硬化 活动性失代偿期 乙型 3、脾大 4、脾功能亢进 5、腹水 6、腹腔感染	1	1	0
1	57	0	0		1	2013-12-17	0			1	0	1	2014-12-27	375	是			36	48	48	1456	11	12	280	1.09091	25.4545	1	10	0	1	0	0	0	0	0	0	1		2017-12-12	2014-01-10	3	0	0	子胃镜检查诊断意见:食管胃底静脉曲张治疗后改变胃底排胶溃疡十二指肠球炎建议半年后复查,予雷贝拉唑治疗胃溃疡.	1.37162e+21	肝炎肝硬化活动性失代偿期乙型 食道胃底静脉曲张破裂出血 腹水 腹腔感染 低蛋白血症 胆囊结石	1	1	0
1	34	1	0		1	2014-01-07	0			0	0	0		1449				36	48	48	1449	1	5.5	10	5.5	10	5.5	10	0	1	0	0	0	0	0	0			2017-12-26	2014-01-16	1	0	0	2014门诊谢雯，后来做了肝移植	13301171226;18001100826	1、上消化道出血 食管胃底静脉曲张破裂出血 失血性贫血 组织胶+聚桂醇治疗术后；2、慢性肝衰竭 3、肝炎肝硬化活动性失代偿期乙型 胆汁淤积 低蛋白血症（Alb 26g/l） 脾功能亢进 腹水 腹腔感染 肝性脑病：4、低钾血症 5、重症肝病	1	1	0
2	49	0	0		0	2013-12-20	0			1	0	1	2015-03-16	451	是			36	48	48	1460	7	7.5	210	1.07143	30	2	20	0	1	0	0	0	0	0	0			2017-12-19	2013-12-27	1	0	0	2016好转出院，3月后复查	1.35528e+21	1、肝硬化伴食道胃底静脉曲张破裂出血 2、肝炎肝硬化 活动性 失代偿期 乙型 3、脾大 脾亢 4、腹水 腹腔感染 5、反流性食管炎 6、贫血 7、低蛋白血症 8、白细胞减少 9、2型糖尿病 糖尿病视网膜病变 糖尿病周围神经病变 糖尿病肾病 10、慢性肾功能不全 11、失眠	1	1	0
2	57	0	0		0	2013-12-21	0			0	0	0		1465				36	48	48	1465	1	2	50	2	50	2	50	0	1	0	0	0	0	0	0			2017-12-25	2013-12-27	1	0	0	2013.12予胃镜下止血治疗，加强保肝对症治疗，加用恩替卡韦抗病毒治疗，患者病情好转，要求回当地医院继续治疗，请示周玉玲主治医师予安排好转出院。	13321105551	肝硬化伴有食管胃底静脉曲张破裂出血 肝炎肝硬化 活动性 失代偿期 乙型 脾大 脾功能亢进 低钾血症	1	1	0
2	62	0	0		0	2013-02-20	0			0	0	0		1458		一级预防		36	48	48	1458	7	3	170	0.428571	24.2857	0.5	50	0	1	0	0	0	0	0	0			2017-02-17	2013-03-08	2	0	0		已故13621351042	1、肝炎肝硬化 活动性 失代偿期 乙型 2、食管胃底静脉曲张硬化治疗后 3、高血压 4、反流性食管炎 5、胃溃疡 6、肝囊肿	1	1	0
2	50	0	1		0	2013-12-01	0			0	0	0		1459	是			36	48	48	1459	1	2	20	2	20	2	20	0	1	0	0	0	0	0	0			2017-11-29	2013-12-08	1	0	0	门诊	13011225982	1、肝炎肝硬化活动性代偿期乙型 2、上消化道出血	1	1	0
1	50	1	0		0	2013-05-05	1	2	脾切除+脾肾	0	0	0		1431	是			36	47	47	1431	2	1	60	0.5	30	0.5	10	0	1	0	0	0	0	0	0			2017-04-05	2013-05-15	2	0	0	患者主因脾切除断流术后3年9个月入院，入院检查发现肝脏占位考虑原发性肝癌，于2017-3-23在局麻下行肝癌TACE，过程顺利，治疗后予以保肝对症治疗，恢复可，黄容海主任医师指示出院。	18301454013	1、食管胃底静脉曲张破裂出血 2、肝炎肝硬化 活动性 失代偿期 乙型 3、低蛋白血症（ALB 28.8g/L） 4、腹水 腹腔感染 5、脾大 脾功能亢进 6、失血性贫血（HGB 67.1g/L）	1	1	0
1	50	1	0		0	2013-12-18	0			1	0	1	2016-12-19	1097	是			36	47	47	1430	1	4	50	4	50	4	50	0	1	0	0	0	0	0	0			2017-11-17	2013-12-30	1	0	0	门诊	"65779022,13901286750"	1、肝炎肝硬化 活动性 失代偿期 乙型 2、食道胃底静脉曲张破裂出血 3、脾大 4、脾功能亢进 5、腹水 6、返流性食道炎 7、2型糖尿病 8、腹泻 9、便秘	1	1	0
1	51	0	0	1	0	2014-01-20	0			1	0	1	2015-07-13	539	是			36	47	47	1435	6	4.5	150	0.75	25	1.5	40	0	1	0	0	0	0	0	0			2017-12-25	2014-02-07	1	0	0		13833406523;13114990022	1、肝炎肝硬化 活动性 失代偿期 乙型 2、食道胃底静脉曲张破裂出血 3、腹腔积液 4、低蛋白血症 5、低钾血症 7、2型糖尿病 8、银屑病	1	1	0
1	62	1	1		0	2013-12-19	0			0	0	0		1431	是			36	47	47	1431	3	2.5	100	0.833333	33.3333	1	40	0	1	0	0	0	0	0	0			2017-11-19	2014-01-07	1	0	0	门诊	13833421785;15833148266	1、肝炎肝硬化 活动性 失代偿期 乙型 2、食道胃底曲张静脉破裂出血 3、腹水 4、低蛋白血症 5、过敏性皮炎	1	1	0
1	53	0	0		1	2014-01-14	0			0	0	0		1427	是			36	47	47	1427	7	11	230	1.57143	32.8571	1	10	0	1	0	0	0	0	0	0			2017-12-11	2014-01-28	6	0	0	门诊	13501307573;	上消化道出血 食道胃底静脉曲张破裂出血 胃底静脉曲张硬化治疗后 贫血 肝炎肝硬化 活动性 失代偿期 乙型 腹水 腹腔感染 低蛋白血症 脾功能亢进 胸腔积液 肝囊肿 上呼吸道感染	1	1	0
1	48	1	1		1	2010-11-10	0			1	1	0	2011-04-21	162	是			36	47	47	1421	1	1	0	1	0	1	0	0	0	1	0	0	0	0	0			2014-10-01	2010-12-01	1	0	0	2013.5.7门诊,2014年9，10月份去世	13520168173	1.肝炎肝硬变 活动性 失代偿期 乙型 2.上消化道出血 3.病毒性肝炎乙型慢性重度 4.低钾血症 5.肝性脑病 6.继发性贫血重度 7.腹腔感染	1	1	0
2	58	0	0		1	2013-03-13	0			1	1	0	2014-01-09	302	是			36	47	47	1430	10	7.5	230	0.75	23	1.5	20	0	1	0	0	0	0	0	0			2017-02-10	2013-04-02	3	0	0	2017.1患者仍感下腹坠胀，大便次数增多，量少，今日症状较前稍有缓解。一般情况可，生命体征平稳，神志清楚。复查腹部增强CT，请肿瘤科李文东副主任医师阅片后建议3月后复查，目前暂无再次行射频的指征。患者要求出院，请示胡居龙主治医师后同意其出院。2017.2.10去世	15300393876关机，18701512818	1、上消化道出血 2、食管胃底静脉曲张破裂出血 3、肝炎肝硬化活动性失代偿期乙型 4、低蛋白血症ALB21.8g/L 5、失血性贫血 6、腹水 7、腹腔感染	1	1	0
1	38	0	0		1	2014-02-13	1	1	脐静脉	0	0	0		1391	是			36	46	46	1391	2	1.5	60	0.75	30	1.5	40	0	1	0	0	0	0	0	0			2017-12-05	2014-02-25	2	0	0	门诊	13671171037;	1、肝炎肝硬化 活动性 失代偿期 乙型 2、食道胃底曲张静脉破裂出血 3、腹水 4、脾功能亢进 5、门脉高压性胃病 6、胃底溃疡	1	1	0
1	42	0	0		0	2014-03-08	0			0	0	0		1386	是			36	46	46	1386	4	3.5	100	0.875	25	1	40	0	1	0	0	0	0	0	0			2017-12-23	2014-03-21	2	0	0	2016.12门诊郭立民	13436844590;13717643849	1、肝炎肝硬化 活动性 失代偿期 乙型 胆汁淤积 2、食道胃底静脉曲张破裂出血 失血性贫血 组织胶硬化剂治疗术后 3、脾功能亢进 4、重症肝病	1	1	0
1	29	0	0		0	2014-03-12	0			0	0	0		1387				36	46	46	1387	2	2	80	1	40	1	40	0	1	0	0	0	0	0	0			2017-12-28	2014-03-21	2	0	0	2014.3食道胃底静脉曲张重度；胃底食道排胶溃疡；组织胶+聚桂醇治疗。2015年做了肝移植	13930249888;	1、肝炎肝硬化 活动性 失代偿期 乙型 2、食管胃底静脉曲张 3、门脉血栓形成 4、肠系膜上静脉血栓形成 5、脾大 脾功能亢进	1	1	0
1	51	0	1		0	2013-11-01	0			1	1	0	2013-12-11	40	是			36	46	46	1400	10	12.5	310	1.25	31	2	40	0	1	0	0	0	0	0	0			2017-09-01	2013-11-08	1	0	0	病情稳定，今予出院，嘱其定期复查，不适随诊。	8.34159e+18	1、肝炎肝硬化 代偿期 乙型 2、脾大 3、脾功能亢进 4、食道胃底静脉曲张破裂出血 5、冠状动脉粥样硬化性心脏病 6、2型糖尿病 7、胃溃疡	1	1	0
2	53	0	0		1	2013-10-16	0			0	0	0		1407	是			36	46	46	1407	2	3	50	1.5	25	2	10	0	1	0	0	0	0	0	0			2017-08-23	2013-10-29	2	0	0	门诊邢慧春	13621089058	1、肝炎肝硬化 失代偿期 活动性 乙型 2、食道胃底静脉曲张破裂出血 3、脾功能亢进 4、高血压病 5、慢性贫血 6、白细胞减少症	1	1	0
1	36	0	0		0	2014-03-13	1	2	脾肾	1	1	0	2014-06-30	109		是		36	45	45	1377	8	14	290	1.75	36.25	2	40	0	1	0	0	0	0	0	0			2017-12-19	2014-03-22	2	0	0		15872503663;	1、肝炎肝硬化 活动性 失代偿期 乙型 2、病毒性肝炎 慢性 重度 3、食道、胃底静脉曲张 重度	1	1	0
2	59	0	0		1	2014-01-28	1	1	脾切除+脐静脉	0	0	0		1362	是			36	45	45	1362	2	2	60	1	30	1	10	0	1	0	0	0	0	0	0			2017-10-21	2014-05-07	2	0	0	门诊	13581902515;15001026687	1、门脉高压症 食道胃底静脉曲张破裂出血 脾大脾功能亢进 腹水 2、肝炎肝硬化活动性失代偿期乙型 3、重度贫血 低蛋白血症 4、食道胃底溃疡 5、左侧环杓关节脱位 6、腹腔感染	1	1	0
1	57	0	0		0	2012-01-08	0			0	0	0		1362				36	45	45	1362	2	1	70	0.5	35	1	30	0	1	0	0	0	0	0	0			2015-10-01	2012-01-18	2	0	0	2012.10.11门诊,2015.10去世，中间未出过血	13716018864	1、肝炎肝硬化 活动性 失代偿期 乙型 2、腹水 3、腹腔感染 4、低蛋白血症 5、食道胃底静脉曲张破裂出血组织胶+聚桂醇治疗术后6、贲门溃疡	1	1	0
1	53	1	1		0	2014-02-25	0			0	0	0		1364	是			36	45	45	1364	1	2.5	40	2.5	40	2.5	40	0	1	0	0	0	0	0	0			2017-11-20	2014-04-24	4	0	0	门诊	13716049704;	1、食道静脉曲张破裂出血 2、肝炎肝硬化 活动性 失代偿期 乙型 3、脾功能亢进 4、脾周围炎 5、腹水 腹腔感染 6、低蛋白血症 7、上呼吸道感染 8、失血性贫血	1	1	0
1	44	1	0		1	2014-03-26	0			1	1	0	2014-10-15	203	是			36	45	45	1361	10	13.5	250	1.35	25	1	10	0	1	0	0	0	0	0	0			2017-12-16	2014-04-04	2	0	0	门诊	13651211433;	1、上消化道出血 2、食管胃底静脉曲张破裂出血 3、失血性休克 4、肝炎肝硬化 活动性 失代偿期 乙型 5、脾功能亢进 6、低蛋白血症（26.9g/L） 7、腹水 8、贫血 7、2型糖尿病 8、反流性食管炎	1	1	0
1	59	1	0		0	2014-03-03	0			1	1	0	2014-06-20	109		一级预防		36	45	45	1380	7	5.5	160	0.785714	22.8571	1.5	50	0	1	0	0	0	0	0	0			2017-12-12	2014-03-20	2	0	0	门诊	13911454002;	1、肝炎肝硬化 活动性 失代偿期 乙型 2、腹水 3、食道胃底静脉曲张 4、脾大 5、脾功能亢进 6、霉菌性食道炎 7、门脉高压性胃病 8、胃窦息肉 9、胃底及十二指肠溃疡 10、幽门螺旋杆菌感染。	1	1	0
2	53	0	0		0	2014-03-22	0			1	1	0	2014-06-17	87	是			36	45	45	1377	5	3.5	80	0.7	16	1	10	0	1	0	0	0	0	0	0			2017-12-28	2014-04-03	2	0	0		13651005292;	上消化道大出血；食道胃底静脉曲张破裂；肝炎肝硬化 活动性 失代偿期 乙型；脾大；腹水；反流性食管炎；子宫肌瘤；低钾血症；痔疮	1	1	0
1	59	1	0		1	2014-04-03	1	1	脐静脉	0	0	0		1345	是			36	44	44	1345	1	1	20	1	20	1	20	0	1	0	0	0	0	0	0			2017-12-08	2014-04-15	1	0	0	门诊	13716197056;13621199743	上消化道出血 胃底静脉破裂出血硬化治疗后 重度贫血 肝炎肝硬化 活动性 失代偿期 乙型 腹水 腹腔感染 低蛋白血症 食道胃底静脉曲张 脾功能亢进 门脉主干及肠系膜上静脉栓塞 肝囊肿	1	1	0
2	62	0	0		0	2014-02-09	1	1	脐静脉	0	0	0		1330		一级预防		36	44	44	1330	2	3	50	1.5	25	1.5	30	0	1	0	0	0	0	0	0			2017-10-01	2014-02-17	1	0	0	肝病尚稳定，未诉特殊不适，予通知今日出院。	13722643726;13260077364	1、肝炎肝硬化 活动性 失代偿期 乙型 2、食道胃底静脉曲张 3、脾功能亢进 4、高血压病 5、慢性浅表性胃炎 6、双下肢静脉曲张 7、肝囊肿 8、胆囊结石	1	1	0
1	61	0	0		0	2013-11-27	0			0	0	0		1343				36	44	44	1343	2	2	70	1	35	2	40	0	1	0	0	0	0	0	0			2017-08-01	2013-12-05	2	0	0	2013.12出院。2017.8去世	13391985259	1、食管胃底静脉曲张破裂出血 2、肝炎肝硬化活动性失代偿期乙型 3、腹水 4、腹腔感染 5、贫血	1	1	0
1	49	0	0		0	2014-04-05	0			1	1	0	2015-02-08	309	是			36	44	44	1335	5	4	90	0.8	18	1	30	1	0	0	0	1	0	0	0	1（第一次胃镜）		2017-11-30	2014-04-23	3	0	0	好转出院	81020248;13264415471	1、肝硬化伴有食管胃底静脉曲张破裂出血 2、重度贫血 3、肝炎肝硬化 活动性 失代偿期 乙型 4、腹水 5、低蛋白血症 6、脾功能亢进 7、酒精性肝损害 8、肺炎 9、胃底溃疡 10、门脉高压性胃病	1	1	0
2	71	0	0		0	2014-01-17	0			1	1	0	2014-03-14	56	是			36	44	44	1333	4	4.5	110	1.125	27.5	1	10	0	1	0	0	0	0	0	0			2017-09-11	2014-02-08	2	0	0	门诊	18612617807;13611315465	1、肝炎肝硬化 活动性 失代偿期 乙型 2、食道胃底静脉曲张破裂出血 3、低蛋白血症 4、腹水 5、败血症 6、脾功能亢进 7、高血压病 8、贫血 9、低钾血症	1	1	0
1	45	0	0		0	2014-06-18	1	1	脐静脉	1	1	0	2014-09-19	93	是			36	43	43	1294	10	14	280	1.4	28	1	10	0	1	0	0	0	0	0	0			2018-01-02	2014-07-17	1	0	0		13810917909;13801154067	1、慢加急性肝衰竭 2、肝炎肝硬化 活动性 失代偿期 乙型 3、食道静脉曲张重度 4、贲门静脉曲张破裂出血 5、聚桂醇及组织胶治疗 6、脾功能亢进 7、肝性脑病 8、腹水 9、低蛋白血症（27.0g/L）10、胆汁淤积性肝病 11、糖尿病 12、十二指肠溃疡 13、低钾血症 14、血小板减低 15、白细胞减少症 16、重度贫血	1	1	0
1	58	1	1		0	2014-05-24	0			1	0	1	2016-03-23	669	是			36	43	43	1319	3	5	70	1.66667	23.3333	3	40	0	1	0	0	0	0	0	0			2018-01-02	2014-06-06	2	0	0	2016.12腹部CT平扫+增强+门脉CT三维重建:肝硬化、脾大、腹水，食道胃底静脉曲张。门脉主干及左右分支栓塞。脾脏不规则低密度灶，部分栓塞？脾被膜下多发钙化。复查胃镜：电子胃镜:胃底组织胶注射后改变，未组织较治疗。请示胡居龙副主任医师后准予今日出院。注意复查胃镜。此后未出过血	13785718921;18730726300	1、肝硬化伴食管胃底静脉曲张破裂出血 2、肝炎肝硬化活动性失代偿期乙型 3、腹水 腹腔感染 4、低蛋白血症（ALB21.5g/L）5、肺部感染 6、重度贫血 7、消化性溃疡 8、慢性支气管炎 9、肠道菌群失调	1	1	0
1	63	0	0		1	2014-03-08	0			0	0	0		1317	是			36	43	43	1317	1	0.5	20	0.5	20	0.5	20	0	1	0	0	0	0	0	0			2017-10-15	2014-03-17	1	0	0	门诊	13911708391;	1、肝炎肝硬化 活动性 失代偿期 乙型 2、食道胃底静脉曲张破裂出血 3、低蛋白血症 4、腹水 5、肝性脑病 6、胆囊切除术后 7、重度贫血 8、冠心病 9、胃大部切除术后 10、低钾血症	1	1	0
1	65	0	0		1	2013-05-22	0			1	1	0	2013-10-02	133	是			36	43	43	1314	4	3	100	0.75	25	0.5	10	0	1	0	0	0	0	0	0			2016-12-26	2013-06-05	2	0	0	精神差，卧床，仍诉乏力，食欲食量差，睡眠差，小便黄，大便正常。全身皮肤黏膜重度黄染，肝掌阳性，移动性浊音可疑。双下肢中度可凹性水肿，踝阵挛可疑，扑翼样震颤阳性。周桂琴主任医师查房后指示：患者肝衰竭，目前凝血功能仍差，今日继续予B型血浆抢救肝衰竭。今日患者要求自动出院，向其及家属交代病情危重，肝衰竭未纠正，未达到出院标准，出院存在风险。患者及其家属表示理解，仍坚持自动出院，并签署自动出院协议，表示责任自负。嘱其遵医嘱服药，不适随诊。	1.37163e+21	肝硬化伴有食管胃底静脉曲张破裂出血 2、失血性贫血 3、肝炎肝硬化 活动性 失代偿期 乙型 4、肝性脑病 5、食管静脉曲张重度 6、腹水 7、腹腔感染 8、低蛋白血症 9、脾功能亢进 10、低钾血症	1	1	0
2	61	0	0		1	2014-04-03	0			1	0	1	2017-03-18	1080	是			36	43	43	1293	5	3	100	0.6	20	0.5	10	0	1	0	0	0	0	0	0			2017-10-17	2014-04-28	2	0	0	电子胃镜检查诊断意见:EV：L（-），Cb，R（+）/GV：3cm（-）F1食管胃底静脉曲张治疗术后食管胃底静脉曲张轻度ESVD+EIS（食管胃静脉曲张精准断流术+食管静脉硬化术）建议治疗半年后复查，予泮托拉唑保护胃黏膜。	15138505238;	1、肝炎肝硬化 活动性 失代偿期 乙型 2、腹水 3、食管胃底静脉曲张破裂出血 4、低蛋白血症 5、低钾血症 6、高血压病 7、2型糖尿病 8、脑梗塞后遗症期	1	1	0
1	47	1	0		1	2014-07-04	1	2	脾肾	0	0	0		1276	是			36	42	42	1276	1	2	0	2	0	2	0	0	0	1	0	0	0	0	0			2017-12-31	2014-07-07	1	0	0		13522319782;13716923499	上消化道大出血（ 食道胃底静脉曲张破裂）；肝炎肝硬化，活动性，失代偿期，乙型；腹水；脾功能亢进；反流性食道炎	1	1	0
2	51	0	0		0	2014-04-22	1	1	脐静脉	0	0	0		1272	是			36	42	42	1272	3	4	70	1.33333	23.3333	2	40	0	1	0	0	0	0	0	0			2017-10-15	2014-04-28	1	0	0	2017-10-15仍在世	13483340216;	1、肝炎肝硬化乙型失代偿期 2、上消化道出血 3、食道胃底静脉曲张中度	1	1	0
1	54	1	1		0	2014-05-23	0			1	1	0	2015-02-19	272	是			36	42	42	1279	3	3	100	1	33.3333	1	40	0	1	0	0	0	0	0	0			2017-11-22	2014-05-27	1	0	0	门诊	15911003992;	肝炎肝硬化 活动性 失代偿期 乙型 食道胃底静脉曲张硬化治疗后 脾功能亢进 霉菌性食道炎 贫血 冠心病 陈旧性心肌梗塞 陈旧性脑梗塞 类风湿性关节炎 肾结石	1	1	0
1	52	1	0		1	2014-06-03	0			1	1	0	2014-09-29	118	是			36	42	42	1288	7	8	170	1.14286	24.2857	1	10	0	1	0	0	0	0	0	0			2017-12-12	2014-06-13	2	0	0		13716542128;15901032920	1、肝炎肝硬化 活动性 失代偿期 乙型 2、食道胃底静脉曲张破裂出血 3、低蛋白血症 4、腹水 5、腹腔感染 6、贫血 7、2型糖尿病	1	1	0
1	59	1	1		0	2013-10-22	0			1	1	0	2014-02-14	115	是			36	42	42	1283	12	10	310	0.833333	25.8333	1.5	40	0	1	0	0	0	0	0	0			2017-04-27	2013-10-31	2	0	0	入院后予静点奥美拉唑抑酸保护胃黏膜，复方甘草酸苷、多烯磷脂酰胆碱抗炎保肝治疗，还原型谷胱甘肽清除自由基，替诺福韦胶囊抗病毒治疗，血钾偏低，予氯化钾缓释片纠正低钾血症，嘱自服呋塞米、螺内酯利尿治疗腹水，患者肿瘤复发，建议介入治疗，患者因个人原因暂拒绝，要求外院继续治疗。	1.58016e+21	1、肝炎肝硬化 活动性 失代偿期 乙型 2、低蛋白血症 3、腹水 4、腹腔感染 5、胸水 6、食管胃底静脉曲张破裂出血硬化+套扎术后 7、酒精性肝硬化 8、反流性食道炎 9、低钾血症	1	1	0
2	52	0	0		1	2014-07-19	0			0	0	0		1265	是			36	42	42	1265	3	1.5	50	0.5	16.6667	0.5	30	0	1	0	0	0	0	0	0			2018-01-04	2014-07-28	1	0	0	2017.1门诊	15810007139;13911845452	1、上消化道出血 2、食管胃底静脉曲张破裂出血 3、肝炎肝硬化 活动性 失代偿期 乙型 4、脾大 5、脾机能(功能)亢进 6、胆囊结石 7、贫血重度	1	1	0
2	63	0	0		0	2009-08-26	0			1	1	0	2010-05-11	258	是			36	42	42	1265	2	1.5	50	0.75	25	0.5	20	0	1	0	0	0	0	0	0			2013-02-11	2009-10-09	1	0	0		已故13716917380	1、肝炎肝硬化 活动性 失代偿期 乙型 2、食道胃底静脉曲张破裂出血 3、腹水 4、低蛋白血症 5、电解质紊乱（低钾血症、低钙血症、低钠血症） 6、肝性脑病 7、2型糖尿病 8、胆囊结石	1	1	0
2	37	0	0		1	2014-05-07	1	2	脾肾	0	0	0		1237	是			36	41	41	1237	5	4.5	120	0.9	24	1	40	0	1	0	0	0	0	0	0			2017-09-25	2014-05-23	1	0	0	门诊	13834418568;	1、肝炎肝硬化 乙型 活动性 失代偿期 2、食道胃底静脉曲张破裂出血 3、腹水 4、低蛋白血症	1	1	0
1	27	0	0		1	2014-08-10	0			0	0	0		1241				36	41	41	1241	3	4	80	1.33333	26.6667	2	0	0	0	1	0	0	0	0	0			2018-01-02	2014-08-20	2	0	0	2014.11.28彩超:肝硬化；脾大；极少量腹水；肝回声结节状；胆囊壁毛糙；门脉高压血流改变。腹部MRI:1.肝硬化、再生结节生成，脾大、食管下段-胃底静脉曲张。2.后腹膜可见肿大淋巴结影。3.胆汁成分异常。诊断“肝硬化，失代偿期，乙型”予保肝、抗病毒等治疗。行电子胃镜:食管胃底静脉治疗后改变，残留静脉曲张中度。聚桂醇+组织胶治疗。建议3个月后复查。	15836396885;	上消化道大出血；食道胃底静脉曲张破裂；肝炎肝硬化，活动性，失代偿期，乙型；低蛋白血症；腹水；重度贫血	1	1	0
1	50	0	0		1	2014-07-29	0			0	0	0		1253				36	41	41	1253	2	1.5	10	0.75	5	1	0	0	0	1	0	0	0	0	0			2018-01-02	2014-08-05	2	0	0	2014.8.5患者仍有低热，体温最高37.8℃，予物理降温后可自行降至正常。患者血象、CRP已基本降至正常，体温较前明显降低，说明头孢噻肟舒巴坦抗感染治疗有效。经补充蛋白后人血白蛋白升至35g/L。经输血治疗后血色素升至66g/L。目前患者无活动性出血，病情稳定，明显好转。患者病毒载量高，建议抗病毒治疗，患者拒绝。患者及家属要去外院行脾切+断流术，于今日要求出院，请示周玉玲主治医师后同意其出院。后至外院行脾切除术，现病情稳定	18832798832;	1、肝硬化伴食管胃底静脉曲张破裂出血 2、肝炎后肝硬化 活动性 失代偿期 乙型 3、低蛋白血症 4、腹水 腹腔感染 5、重度贫血 6、反流性食管炎 7、低钾血症	1	1	0
1	38	0	0		1	2013-12-07	0			1	1	0	2014-05-02	146	是			36	41	41	1252	6	4	200	0.666667	33.3333	1	40	0	1	0	0	0	0	0	0			2017-05-12	2013-12-19	2	0	0	急诊	1.59015e+21	上消化道出血 食道胃底静脉曲张破裂出血 食道胃底静脉曲张硬化治疗后 贫血 慢性肝衰竭 肝炎肝硬化 活动性 失代偿期 乙型 腹水 腹腔感染 脾功能亢进 门脉血栓 门脉高压性胃病 胃溃疡	1	1	0
1	62	0	1		0	2010-09-08	1	1	脐静脉	1	0	1	2012-11-27	811		一级预防		36	40	40	1211	4	1.5	110	0.375	27.5	0	30	1	0	0	0	0	0	1	0	1（第一次胃镜）		2014-01-01	2010-09-25	2	0	0	2013门诊，去世3年，具体时间不详	69967390无人接听、13520322733	1、肝炎肝硬化 活动性 失代偿期 乙型 2、胃镜下食管静脉曲张套扎治疗 3、高血压病	1	1	0
1	35	0	1		1	2011-02-19	1	2	食管旁+脾肾	0	0	0		1223	是			36	40	40	1223	2	1	60	0.5	30	1	40	0	1	0	0	0	0	0	0			2014-06-26	2011-03-08	1	0	0	2014.6.2门诊江宇泳,2014.6.26去世	15011279539	1、肝硬化 活动性 失代偿期 乙型 2、食道胃底静脉曲张破裂出血 3、失血性休克 4、腹水 5、腹腔感染 6、胸水	1	1	0
2	46	0	0		0	2014-08-26	1	1	脐静脉	0	0	0		1225	是			36	40	40	1225	1	2.5	10	2.5	10	2.5	10	0	1	0	0	0	0	0	0			2018-01-02	2014-09-09	1	0	0	2016.5.28门诊	13260466596;18231604420空号	食道胃底静脉曲张破裂出血、失血性贫血、肝炎肝硬化 活动性 失代偿期 乙型、腹水、腹腔感染、脾功能亢进、电解质紊乱、低白蛋白血症	1	1	0
1	46	0	0		0	2014-09-12	0			0	0	0		1203	是			36	40	40	1203	1	1	0	1	0	1	0	0	0	1	0	0	0	0	0			2017-12-28	2014-10-24	1	0	0	2015.7.10门诊	13439843554无人接听;13661027484	门脉高压症、食道胃底静脉曲张破裂出血、脾淤血性肿大伴脾功能亢进、脾周围炎、肝炎肝硬化 乙型、贫血	1	1	0
1	52	1	1		0	2014-08-18	0			0	0	0		1218	是			36	40	40	1218	1	2	10	2	10	2	10	0	1	0	0	0	0	0	0			2017-12-18	2014-08-26	1	0	0	门诊	13401072007;	1、食道胃底静脉曲张破裂出血 2、肝炎肝硬化 活动性 失代偿期 乙型 3、失血性贫血 4、低蛋白血症 5、脾大 6、脾功能亢进 7、肝占位性质待定	1	1	0
1	43	1	1		0	2014-09-10	0			0	0	0		1205				36	40	40	1205	3	6	140	2	46.6667	3	50	0	1	0	0	0	0	0	0			2017-12-28	2014-09-19	2	0	0	2015.2.4门诊胡居龙	15911116303;	1、肝硬化伴食道胃底静脉曲张破裂出血 2、肝炎肝硬化 活动性 失代偿期 乙型 3、脾大 脾亢 4、腹水 5、贫血 6、低蛋白血症	1	1	0
1	68	0	0		0	2014-08-31	0			0	0	0		1207	是			36	40	40	1207	1	0.5	10	0.5	10	0.5	10	0	1	0	0	0	0	0	0			2017-12-20	2014-09-29	1	0	0	门诊	18701032397;	1、肝炎肝硬化 活动性 失代偿期 乙型 腹水 低蛋白血症 食管贲门静脉破裂出血 2、药物性肝损害不除外 3、贫血 颈椎病 腰椎病 4、 返流性食管炎 5、双眼老年性白内障、神经性耳聋 干燥性鼻炎 6、上呼吸道感染 7、低钾血症。	1	1	0
1	42	1	0		0	2014-06-13	0			0	0	0		1220				36	40	40	1220	2	3	30	1.5	15	2	10	0	1	0	0	0	0	0	0			2017-10-15	2014-06-25	2	0	0	2014.7患者无发热，无腹痛、腹泻。查体：肝病面容，腹软，无压痛、反跳痛，移动性浊音阴性。双下肢无水肿。段雪飞主任医师查房，同意出院。2017-10-15仍在世	13366668525;	1、上消化道出血 2、慢性肝衰竭 3、肝炎肝硬化 活动性 失代偿期 乙型、食管胃底静脉曲张破裂出血、肝性脑病、腹水、低蛋白血症（ALB 26.0g/L）、脾功能亢进 4、肝原发恶性肿瘤可能性大 5、贫血 6、胃溃疡 7、胃镜下胃静脉曲张硬化术 8、胃镜下食管静脉曲张硬化剂注射术	1	1	0
1	51	1	1		0	2014-10-06	1	2	脾肾	0	0	0		1174				36	39	39	1174	2	3	90	1.5	45	1.5	40	0	1	0	0	0	0	0	0			2017-12-23	2014-10-21	2	0	0	2014.10现患者病情平稳，胃镜治疗效果好，继续目前治疗方案进行治疗，注意病情变化。患者要求今日出院，请示段英主治医师后，鉴于病情好转，达到出院标准，同意今日出院，出院后继续予药物治疗。	18122534750;13617129425	1、肝炎肝硬化 活动性 失代偿期 乙型 2、食道静脉曲张破裂出血 3、腹水 4、低蛋白血症	1	1	0
1	44	1	1		0	2014-09-30	0			1	1	0	2014-11-24	55	是			36	39	39	1182	1	4	10	4	10	4	10	0	1	0	0	0	0	0	0			2017-12-25	2014-10-13	1	0	0	于2016年4月8日急诊全麻下行手助腹腔镜脾切除+贲门周围血管离断术，术后恢复顺利并出院。	13930560875;13733253237	食管胃底静脉曲张破裂出血 肝硬化 失代偿期 乙型 腹水 腹腔感染 贫血 肺部感染 肝脏异常强化结节性质待定 门静脉主干局部栓塞 低钾血症	1	1	0
2	39	0	0		0	2014-04-03	0			0	0	0		1183		一级预防		36	39	39	1183	7	5.5	140	0.785714	20	1	20	0	1	0	0	0	0	0	0			2017-06-29	2014-04-04	1	0	0	患者现无不适，肝功能尚可，予出院。	13161672385;18301141338	1、肝炎肝硬化 活动性 失代偿期 乙型 2、食道胃底静脉曲张重度	1	1	0
1	66	0	0		0	2014-05-08	1	2	脾肾	0	0	0		1155	是			36	38	38	1155	1	0	20	0	20	0	20	0	0	0	1	0	0	0	0			2017-07-06	2014-05-22	1	0	0	已故	13718288006;13520069582	肝炎肝硬化活动性失代偿期乙型 食管静脉曲张破裂出血 腹水 胸腔积液 低蛋白血症 反流性食管炎 肺部感染 宫颈息肉	1	1	0
1	50	1	1		0	2014-10-14	0			1	0	1	2015-12-24	436		一级预防		36	38	38	1168	7	11	240	1.57143	34.2857	3.5	30	0	1	0	0	0	0	0	0			2017-12-25	2014-10-29	1	0	0	入院予恩替卡韦抗病毒治疗，还原性谷胱甘肽、复合辅酶抗炎保肝，12-19日患者行胃镜下治疗，术后患者无发热，精神食欲正常，肿瘤介入科李常青主任医师会诊意见：患者男性。52岁，有HBs（+）背景，以“消化道出血”入院，肿瘤标记物阴性，腹部MRI：左、右叶比例失调，左外叶代偿性增大。肝内多个稍长T1、T2结节。DWI进程稍高信号，但静脉期、实质期均未出现原发性肝癌影像特征性表现。根据原发性肝癌的诊断标准，目前诊断依据不足。建议：1.可行PET-CT检查，判断结节代谢活性，帮助诊断及良恶性质鉴别诊断。2.可行B超引导下的组织活检。患者暂拒绝进一步检查。	13901003559;13901111212	1、肝炎肝硬化 活动性 失代偿期 乙型 2、脾大 3、腹水 4、食管静脉曲张中度 5、胃底静脉曲张轻度 6、肝囊肿 7、左肾小囊肿 8、乙状结肠息肉 9、直肠炎	1	1	0
2	40	0	0		0	2014-05-08	0			0	0	0		1160	是			36	38	38	1160	4	3.5	100	0.875	25	0.5	0	0	0	1	0	0	0	0	0			2017-07-11	2014-05-21	2	0	0	门诊周玉玲	13436882095;	1、食管胃底静脉曲张破裂出血 2、肝炎后肝硬化 活动性 失代偿期 乙型 3、腹水 4、低蛋白血症 5、低钾血症 6、贫血 7、反流性食管炎 8、肠道菌群失调 9、脾大 脾功能亢进	1	1	0
1	60	0	0		1	2014-11-21	1	1	脐静脉	0	0	0		1131	是			36	37	37	1131	2	1.5	50	0.75	25	1	10	0	1	0	0	0	0	0	0			2017-12-26	2014-11-28	2	0	0	2016.5门诊	13821676833停机;18033625522	1、肝硬化伴食管胃底静脉曲张破裂出血 2、肝炎肝硬化 活动性 失代偿期 乙型 3、肝性脑病 4、贫血 5、低蛋白血症 6、脾大 7、腹水 8、肠系膜上静脉部分栓塞 9、胆囊结石 10、胆囊炎 11、肝囊肿 12、双肾囊肿 13、右肾结石 14、反流性食管炎 15、肠道菌群失调	1	1	0
1	58	0	0		0	2014-04-10	1	2	脾肾	0	0	0		1133		是		36	37	37	1133	1	2	40	2	40	2	40	0	1	0	0	0	0	0	0			2017-05-17	2014-04-22	1	0	0	入院后予恩替卡韦抗病毒治疗,复方甘草酸苷抗炎保肝、还原型谷胱甘肽清除自由基治疗,前列地尔改善微循环,胸腺五肽增强免疫力.患者现一般情况稳定,请示李明慧主任医师,予以办理出院.	13269744122;	1、肝炎肝硬化 活动性 失代偿期 乙型 2、食道胃底静脉曲张 3、低蛋白血症 4、腹水 5、脾功能亢进 6、肝右叶强化灶 7、霉菌性食道炎	1	1	0
1	44	1	0		1	2012-11-01	0			1	0	1	2015-12-01	1125	是			36	37	37	1125	1	1	10	1	10	1	10	0	1	0	0	0	0	0	0			2015-12-01	2012-11-13	1	0	0		已故13716706757、18701256021	1、肝炎肝硬化 活动性 失代偿期 乙型 2、上消化道出血 3、腹水 4、腹腔感染 5、低白蛋白血症 6、食道胃底静脉重度曲张	1	1	0
1	43	0	0		1	2014-10-29	0			0	0	0		1127	是			36	37	37	1127	1	1	10	1	10	1	10	0	1	0	0	0	0	0	0			2017-11-29	2014-11-14	1	0	0	门诊感染科	18730355638;13439566157	1、肝炎肝硬化 活动性 失代偿期 乙型 2、食道胃底静脉曲张破裂出血 3、脾功能亢进 4、低蛋白血症 5、腹水 6、腹腔感染 7、慢性肝衰竭 8、失血性贫血 9、脾静脉栓塞	1	1	0
1	66	0	0		1	2014-11-01	0			0	0	0		1126	是			36	37	37	1126	1	1.5	20	1.5	20	1.5	20	0	1	0	0	0	0	0	0			2017-12-01	2014-11-13	1	0	0	门诊张婷	13611098331;	1、上消化道出血 2、食管胃底静脉曲张破裂出血 3、肝炎肝硬化 活动性 失代偿期 乙型 4、脾大 脾功能亢进5、反流性食道炎 6、低蛋白血症7、高血压III级 极高危组 8、2型糖尿病 9、脑梗塞后遗症10、低钾血症	1	1	0
1	43	0	0		0	2014-09-25	0			0	0	0		1126	是			36	37	37	1126	7	11.5	250	1.64286	35.7143	4	50	0	1	0	0	0	0	0	0			2017-10-25	2014-10-09	2	0	0	病情好转予出院。	13839268272;	1、肝炎肝硬化 活动性 失代偿期 乙型 2、食道胃底静脉曲张 3、腹水 4、脾功能亢进 5、胸水 6、门静脉、脾静脉血栓 7、肝内结节性质待定 8、低钾血症 6、2型糖尿病	1	1	0
1	37	0	0		1	2009-02-26	0			1	1	0	2009-10-31	247	是			36	37	37	1115	7	3	180	0.428571	25.7143	0.5	20	1	0	0	0	1	0	0	0	1（第一次胃镜）		2012-03-17	2009-03-09	2	0	0	已故	13381306863	1、肝炎肝硬化 活动性 失代偿期 乙型 2、食管胃底静脉破裂出血 3、腹水 4、胆囊炎 5、贫血 6、继发性白细胞减少 7、2型糖尿病 8、双肾多发囊肿 左肾多发结石	1	1	0
2	35	0	0		1	2014-12-10	0			1	1	0	2015-09-03	267	是			36	37	37	1113	10	13.5	210	1.35	21	4	30	0	1	0	0	0	0	0	0			2017-12-27	2015-01-09	1	0	0		13911887521;	1、肝炎肝硬化 活动性 失代偿期 乙型 2、食道胃底静脉曲张破裂出血 3、低蛋白血症 4、腹水 5、脾功能亢进 6、白细胞减少症 7、血小板减少症 8、重度贫血 9、阑尾切除术后 10、双侧胸水 11、便秘 12、食道胃底静脉曲张硬化治疗术	1	1	0
1	32	0	1		1	2014-12-19	0			1	0	1	2016-07-28	587	是			36	36	36	1105	3	5	70	1.66667	23.3333	1	10	0	1	0	0	0	0	0	0			2017-12-28	2015-01-09	1	0	0	2016.8.5入院后给予生长抑素降门脉压、抑酸、止血、保肝及补液支持治疗，继续抗病毒治疗，胃镜下止血治疗。经治疗，患者出血停止，一般情况好转。复查HGB 89.0g/L，便潜血阴性，肝肾功能基本正常。患者本次住院不同意复查胃镜，不同意行腹部增强CT或核磁检查，要求今日出院，杨松主治医师准予出院，嘱定期门诊复查胃镜、腹部影像学检查，门诊随诊。	13011880482;13552501601	肝炎肝硬化活动性失代偿期乙型、食道胃底静脉曲张破裂出血、贫血、白细胞减低、血小板减低、获得性免疫缺陷综合征	1	1	0
1	45	0	0		0	2014-11-14	0			0	0	0		1103		是		36	36	36	1103	5	4.5	150	0.9	30	1	40	0	1	0	0	0	0	0	0			2017-11-21	2014-11-28	2	0	0	胃镜:食管静脉曲张轻度，EIS(食管曲张静脉硬化术），3月后复查。给予保肝、抑酸及胃镜下静脉曲张硬化术治疗，病情好转出院。	15847359438;13947656943	1、肝硬化伴有食道胃底静脉曲张 2、肝炎肝硬化 活动性 失代偿期 乙型 3、贫血	1	1	0
1	47	1	0		1	2014-10-31	0			0	0	0		1097	是			36	36	36	1097	5	5	140	1	28	1	10	0	1	0	0	0	0	0	0			2017-11-01	2014-11-17	3	0	0	门诊	15895681191;13426072770	食道胃底静脉破裂出血 肝炎肝硬化活动性失代偿期乙型 低蛋白血症 高血压2级 胃底排胶溃疡	1	1	0
1	30	1	0		0	2014-09-22	0			1	1	0	2015-05-03	223	是			36	36	36	1101	1	1	10	1	10	1	10	0	1	0	0	0	0	0	0			2017-09-27	2014-09-28	1	0	0	门诊	15512296809;	1、肝炎肝硬化 活动性 失代偿期 乙型 2、腹水 3、低蛋白血症4、脾大、脾功能亢进 5、食管胃底静脉曲张破裂出血 消化道出血后 6、2型糖尿病 7、贫血	1	1	0
1	42	0	1		0	2012-07-11	0			1	1	0	2013-01-14	187				36	36	36	1085	4	5	110	1.25	27.5	1	10	0	1	0	0	0	0	0	0			2015-07-01	2012-08-17	2	1	1	2013年1月25日行胃镜下硬化治疗。经积极保肝抗炎、利尿治疗，现胸水消退，腹水量明显减少，肝功能基本稳定。患者肝硬化基础上，门脉高压反复出现腹水、上消化道出血，无外科手术机会，可行介入Tips治疗，患者表示暂拒绝。 2015年7-8月去世	13944423455空号、15604346661	1、肝炎肝硬化活动性失代偿期乙型 2、食道胃底静脉曲张破裂出血 3、腹水 4、脾功能亢进 5、低蛋白血症 6、右肺炎 7、右侧胸腔积液 8、2型糖尿病 9、双眼糖尿病视网膜病变（III期） 10、低钾血症 11、慢性牙周炎	1	1	0
1	27	1	1		0	2014-12-24	0			1	1	0	2015-06-12	170	是			36	36	36	1098	7	8.5	140	1.21429	20	2	0	0	0	1	0	0	0	0	0			2017-12-26	2015-01-21	1	0	0		13521421047	1、慢加急性肝衰竭 2、肝炎肝硬化 活动性 失代偿期 乙型 3、食道胃底静脉曲张破裂出血组织胶+聚桂醇治疗术后4、腹水 5、腹腔感染 6、肺部感染 7、低蛋白血症8、胆汁淤积9、返流性食道炎10、失血性休克11、中度贫血12、肠道菌群失调	1	1	0
1	62	0	0		0	2014-11-02	0			1	1	0	2015-01-21	80	是			36	36	36	1103	8	10.5	190	1.3125	23.75	2	40	0	1	0	0	0	0	0	0			2017-11-09	2014-11-21	2	0	0	门诊梁秀霞	13011299144;13520290096	1、急性上消化道出血 2、食管胃静脉曲张破裂出血 3、肝炎肝硬化 乙型 活动期 失代偿期 4、门脉高压症 5、脾大 脾功能亢进 三系减少 6、重度低白蛋白血症 7、腹腔积液 8、低钾血症 9、营养不良性贫血 中度 10、腹腔感染 11、胃底溃疡 12、骨质疏松症13、便秘	1	1	0
1	60	1	1		1	2014-01-24	0			0	0	0		1073				35	35	35	1073	1	1	0	1	0	1	0	0	0	1	0	0	0	0	0			2017-01-01	2014-01-29	1	1	1	2014门诊王晓静	18611063532;	1、肝硬化伴食管胃底静脉曲张破裂出血 2、肝炎肝硬化 活动性 失代偿期 乙型 3、腹水 腹腔感染 4、低蛋白血症 5、肺部感染 6、贫血 失血性贫血+营养不良性贫血 7、高血压	1	1	0
1	57	0	0		0	2010-02-25	0			0	0	0		1066	是			35	35	35	1066	2	1	70	0.5	35	1	40	0	1	0	0	0	0	0	0			2013-01-26	2010-03-22	2	1	1	急诊，2012.12-23出院介入术后，1.26去世	13601031842、13601031842	1、肝炎肝硬化 活动性 失代偿期 乙型 2、食道胃底静脉曲张破裂出血 3、组织胶及聚桂醇治疗后 4、腹水 5、腹腔感染 6、胸腔积液 7、低蛋白血症（20.9g/L） 8、肝性脑病 9、脾功能亢进 10、肝右叶结节性质未明，原发性肝癌不除外 11、失血性贫血（重度）12、胆囊炎	1	1	0
2	61	0	0		1	2015-01-06	1	2	脾肾	1	1	0	2015-11-22	320	是			31	31	31	932	3	2.5	50	0.833333	16.6667	1.5	0	0	0	1	0	0	0	0	0			2017-07-26	2015-01-21	2	1	1	已故	13621328146	上消化道出血 食道胃底静脉曲张破裂出血硬化治疗后 轻度贫血 肝炎后肝硬化 活动性失代偿期 乙型 腹水 低蛋白血症 脾功能亢进 门脉栓塞 2型糖尿病 低钾血症 低磷血症 胆囊结石 肝囊肿 脾囊肿 右肾结石 左股骨颈骨折 骨质疏松 陈旧肋骨骨折慢性支气管炎 脐疝	1	1	0
2	64	0	0		0	2010-04-13	1	2	脐静脉+副脐静脉	1	1	0	2011-01-15	277	是			31	31	31	933	4	0.5	100	0.125	25	0	30	0	0	0	1	0	0	0	0			2012-11-01	2010-04-22	2	1	1	2011.10门诊江宇泳，2012.11去世	61493064、15910490111	1、肝炎肝硬化活动性失代偿期乙型 2、食道静脉曲张破裂出血 3、套扎+硬化剂治疗术后 4、失血性贫血（中度） 5、腹水 6、腹腔感染 7、右侧胸腔积液 8、低蛋白血症 9、脾功能亢进 10、肝右叶结节性质未明，原发性肝癌不除外 11、2型糖尿病 12、高血压病2级高危组 13、右肾结石 14、子宫切除术后	1	1	0
2	73	0	0		0	2011-11-14	0			1	1	0	2012-05-30	198		是		31	31	31	960	4	6.5	170	1.625	42.5	3	30	0	1	0	0	0	0	0	0			2014-07-01	2011-12-20	4	1	1	2014.5患者入院后查体BP170/80mmHg，予对症治疗后头晕症状稍有好转。 耳鼻喉科会诊：诊断右耳化脓性感染；建议外耳滴液；头孢他啶抗感染。患者症状反复出现，予对症治疗后好转。患者住院期间自述饮水后呛咳明显，但查体未见明显新发神经系统体征。	13501156644	肝炎肝硬化活动性失代偿期乙型 食道胃底静脉曲张 腹水 低蛋白血症 脾功能亢进 失血性贫血 心律失常 阵发心房颤动 不稳定型心绞痛 冠状动脉粥样硬化性心脏病 心功能Ⅰ级（NYHA分级） 2型糖尿病 糖尿病视网膜病变 右眼玻璃体积血 结肠息肉 混合痔 白内障 低钾血症	1	1	0
1	50	0	1		0	2015-02-01	1	1	脐静脉	1	0	1	2016-09-24	601	是			30	30	30	912	6	7	130	1.16667	21.6667	2	30	1	0	0	0	1	0	0	0	1（第一次胃镜）		2017-08-01	2015-02-15	3	1	1	已故	13552930775	1、肝炎肝硬化 活动性 失代偿期 乙型 2、食道胃底静脉曲张破裂出血 3、腹水 4、低蛋白血症 5、脾功能亢进 6、2型糖尿病 7、轻度贫血 8、低钾血症 9、痰热咳嗽 10、胆囊切除术后 11、腰椎术后	1	1	0
2	58	0	0		0	2009-10-29	1	2	脾肾	0	0	0		910	是			30	30	30	910	1	1	30	1	30	1	30	0	1	0	0	0	0	0	0			2012-04-26	2009-11-12	1	1	1	我院死亡	13681409210、13161855485	1、肝炎肝硬化 活动性 失代偿期 乙型 2、上消化道出血 3、2型糖尿病(非肥胖)(肥胖) 4、冠心病 心肌缺血？	1	1	0
1	39	0	0		1	2013-03-01	1	1	脾肾	1	0	1	2015-08-02	884	是			29	29	29	887	1	2	30	2	30	2	30	0	1	0	0	0	0	0	0			2015-08-05	2013-03-12	1	1	1	6：15pm心跳骤停，立即进行心外按压，间断推注肾上腺素，7：28pm由120救护车运送回家。	"0315 7965087,15833256694"	上消化道出血 食道胃底静脉曲张破裂出血 失血性贫血 组织胶硬化剂治疗术后 肝炎肝硬化 活动性 失代偿期 乙型 腹水 腹腔感染 低蛋白血症 脾功能亢进 肺部感染	1	1	0
1	54	0	0		1	2012-06-08	0			1	1	0	2012-11-27	172	是			29	29	29	896	2	3.5	50	1.75	25	2	30	0	1	0	0	0	0	0	0			2014-11-21	2012-07-11	1	1	1		已故15910481605	1、上消化道出血 2、肝炎肝硬化 活动性 失代偿期 乙型 3.低蛋白血症 4.腹水 5.食管贲门静脉重度曲张 6.左侧胸水 7.双肾多发小囊肿	1	1	0
1	56	1	1		0	2014-10-30	0			1	1	0	2015-01-21	83	是			27	27	27	829	6	8	170	1.33333	28.3333	2.5	20	0	1	0	0	0	0	0	0			2017-02-05	2014-11-09	1	1	1	已故	15810887222;	上消化道大出血；食道胃底静脉曲张破裂；肝炎肝硬化，活动性，失代偿期，乙型；低蛋白血症；肝性脑病；腹水；2型糖尿病	1	1	0
2	70	0	0		0	2012-02-12	0			1	1	0	2012-05-19	97	是			26	26	26	796	5	4.5	100	0.9	20	1	40	0	1	0	0	0	0	0	0			2014-04-18	2012-02-27	2	1	1	2014.4出院后不久去世	13683005797	1、上消化道出血 食管胃底静脉曲张破裂出血 贫血（中度） 2、肝炎肝硬化 活动性 失代偿期 乙型 低蛋白血症 腹水 右侧胸腔大量积液合并感染 脾大 脾功能亢进 3、营养性贫血 4、左房稍大 二、三尖瓣反流(中-轻度)	1	1	0
1	56	1	0		0	2011-11-29	0			0	0	0		764				25	25	25	764	2	1	90	0.5	45	1	50	0	1	0	0	0	0	0	0			2014-01-01	2011-12-12	2	1	1	2012.7门诊,2014.1去世	13811272430	1、急性上消化道出血 食道胃底静脉曲张破裂出血 2、肝炎肝硬化 活动性 失代偿期 乙型 3、低蛋白血症 4、脾大、脾功能亢进 5、腹水 6、左侧胸水 7、肝右叶小结节 原发性肝癌可能性大 8、胆囊结石 9、慢性胆囊炎急性发作 10、右肾囊肿	1	1	0
2	76	0	0		0	2010-11-17	0			1	1	0	2011-05-29	193	是			25	25	25	776	5	0.5	120	0.1	24	0	30	0	0	0	1	0	0	0	0			2013-01-01	2010-12-02	1	1	1	2012.7.19患者仍主诉腹胀，偶有恶心，呕吐。无发热，无腹痛，无便血。昨日尿量为1800-2200ml。查体：神志清楚，精神不振，面色晦暗，巩膜无明显黄染，双肺呼吸音粗，未闻及干湿性啰音。腹部饱满，未触及压痛及反跳痛，移动性浊音阳性，双下肢轻度水肿，扑翼征阴性。2013.1去世	13521288235	1、肝硬化 活动性 失代偿期 乙型 脾功能亢进（三系降低） 上消化道出血 腹水 食管静脉重度曲张 2、肺部感染 3、慢性胃炎 4、冠心病 冠脉支架置入术后 5、高血压病 6、粒细胞缺乏症 7、贫血 8、慢性结膜炎 9、双眼白内障 10、双眼视网膜动脉硬化症	1	1	0
1	51	1	1		0	2009-07-02	1	2	食管旁	1	1	0	2009-07-27	25	是			24	24	24	750	2	4.5	40	2.25	20	0.5	0	0	0	1	0	0	0	0	0			2011-07-22	2009-07-07	1	1	1	2011.4好转出院,2011.7.22去世	13835218693	1、肝炎后肝硬化、活动性、失代偿期、乙型 2、上消化道出血 食道胃底静脉曲张破裂出血 3、肝性脑病3度	1	1	0
1	62	1	1		1	2015-05-24	0			1	1	0	2016-03-04	285	是			24	24	24	734	8	8.5	160	1.0625	20	1	10	0	1	0	0	0	0	0	0			2017-05-27	2015-06-04	2	1	1	2017.4患者恶性肿瘤终末期，无介入及手术治疗机会，出院1月去世	15226608723	1、上消化道出血 2、食管胃底静脉曲张破裂出血 重度贫血 3、肝炎肝硬化 活动性 失代偿期 乙型 脾大 脾功能亢进 4、腹水 低蛋白血症 5、2型糖尿病 6、胃溃疡。	1	1	0
1	58	0	0		0	2011-02-22	0			1	1	0	2011-05-26	93	是			24	24	24	743	1	0	30	0	30	0	30	0	0	0	1	0	0	0	0			2013-03-06	2011-03-29	1	1	1	我院死亡	69062711	1、肝炎肝硬化 活动性 失代偿期 乙型 2、上消化道出血 3、腹水 4、腹腔感染 5、低蛋白血症 6、食道胃底静脉曲张 7、贫血 8、冠状动脉粥样硬化性心脏病 9、陈旧性心肌梗死 10、急性冠脉综合征 11、心功能Ⅳ（killip分级）12、肺部感染 13、双侧胸水 14、2型糖尿病 15、缺血缺氧性脑病	1	1	0
2	65	0	0		0	2015-12-21	0			0	0	0		711				23	23	23	711	4	9.5	130	2.375	32.5	5	50	0	1	0	0	0	0	0	0			2017-12-01	2015-12-31	2	1	1	2016患者一般情况尚可，腹胀好转，无恶心呕吐，无发热。最近刚去世	15031803201、18310185768	1、肝炎肝硬化 活动性 失代偿期 乙型、食管胃底静脉曲张破裂出血、硬化剂+组织胶治疗、腹水、低蛋白血症、脾功能亢进 2、胃底排胶期溃疡 3、中度贫血 4、低钾血症 5、子宫肌瘤切除术后	1	1	0
2	66	0	0		0	2015-07-06	1	2	脾胃肾	0	0	0		680	是			22	22	22	680	2	5	30	2.5	15	3.5	20	0	1	0	0	0	0	0	0			2017-05-16	2015-07-30	2	1	1	2016.8.17门诊,2017.5.16去世	80508571、13801026371	1、肝炎肝硬化 活动性 失代偿期 乙型 2、食道胃底静脉曲张硬化治疗术后 3、高血压病 4、慢性胃炎	1	1	0
2	52	0	0		0	2011-12-04	1	1	脐静脉	1	1	0	2012-11-11	343	是			22	22	22	678	1	1.5	20	1.5	20	1.5	20	1	0	0	0	1	0	0	0	1（第一次胃镜）		2013-10-12	2011-12-13	2	1	1	2013.4门诊，2013.10.12去世	15801356113	1、肝炎肝硬化 活动性 失代偿期 乙型 2、肝内占位性质待定 3、上消化道出血 4、腹水 5、低蛋白血症	1	1	0
1	59	1	1		0	2009-05-18	0			1	0	1	2010-09-19	489	是			21	21	21	654	4	3.5	100	0.875	25	1	10	1	0	0	0	1	0	0	0	1（第一次胃镜）		2011-03-03	2009-06-02	2	1	1	患者血红蛋白较前明显下降，重度贫血，行急诊胃镜，输红细胞悬液纠正贫血，予同型血浆纠正凝血障碍。腹部B超：肝硬化 肝内回声结节状 肝囊肿，胆囊壁厚，双边，脾大，腹水。门脉高压血流改变。12N于胃镜室行胃镜检查见食道贲门胃底静脉曲张中度，食道、贲门曲张静脉破裂出血，组织胶治疗，建议进一步外科或介入治疗。已充分向患者家属交待病情，患者家属拒绝外科或介入治疗并签字。患者间断呕血，生命体征不平稳，向患者家属（兄弟、儿子）交待病情后，家属要求立即自动出院，再三强调目前患者仍有活动性出血，如出院路上极有可能发生生命危险，患者家属仍坚持自动出院并签字。上级医师嘱办理自动出院手续。	13653320573、15933323911	1、肝炎肝硬化 活动性 失代偿期 乙型 腹水 腹腔感染 食道胃底静脉曲张套扎硬化治疗术后	1	1	0
1	56	1	1		0	2014-10-10	0			0	0	0		630				20	20	20	630	1	0.5	10	0.5	10	0.5	10	0	1	0	0	0	0	0	0			2016-07-01	2014-10-20	1	1	1	2014好转出院,2016.7去世	13450073131;	1、肝炎肝硬化 活动性 失代偿期 乙型 2、上消化道出血 3、腹水 4、低蛋白血症 5、胆囊息肉 6、胸水 7、肺不张 8、肝内结节	1	1	0
1	48	0	0		0	2014-01-04	0			1	1	0	2014-03-05	60	是			20	20	20	627	8	10	200	1.25	25	1.5	30	0	1	0	0	0	0	0	0			2015-09-23	2014-01-17	2	1	1	患者拒绝行胃镜检查，继续给予抑制胃酸、降低门静脉压力、止血、抗感染、纠正低蛋白血症、利尿消腹水及间断放腹水、输血浆对症等治疗，目前患者腹胀症状好转，患者及家属要求出院回当地继续治疗，予出院。去世时间不详	15611303474关机;13683398868	1、肝硬化伴食道胃底静脉曲张破裂出血 2、肝炎肝硬化 活动性 失代偿期 乙型 3、脾大 脾亢 4、腹水 5、低蛋白血症（28.7g/l） 6、反流性食管炎 7、排胶溃疡 8、营养不良性贫血 9、低钾血症 10、上呼吸道感染 11、胆囊炎 12、双侧胸水	1	1	0
1	55	0	0		0	2009-10-29	0			1	1	0	2010-03-10	132		一级预防		19	19	19	574	3	1	80	0.333333	26.6667	1	10	0	1	0	0	0	0	0	0	1		2011-05-26	2009-11-19	2	1	1		已故13718771383、13501312298	1、肝炎肝硬化 活动性 失代偿期 乙型 2、食道下段及胃底静脉重度曲张 3、组织胶+聚桂醇治疗术后 4、腹水 5、腹腔感染 6、门静脉高压性胃病 7、脾功能亢进 8、低蛋白血症 9、2型糖尿病	1	1	0
2	58	0	0		1	2014-12-10	0			0	0	0		600	是			19	19	19	600	2	3.5	70	1.75	35	1	10	0	1	0	0	0	0	0	0			2016-08-01	2014-12-22	2	1	1	2016.7门诊于浩，之后去世，	13910990624;	1、肝炎肝硬化 活动性 失代偿期 乙型 2、食道胃底静脉曲张破裂出血 3、低蛋白血症 4、腹水 5、脾功能亢进 6、门脉高压性胃病 7、肝性脑病 8、失血性贫血 9、肺部感染 10、胸水	1	1	0
1	52	0	0		1	2014-04-14	0			1	0	1	2015-10-03	537	是			18	18	18	567	3	4.5	110	1.5	36.6667	1	30	0	1	0	0	0	0	0	0			2015-11-02	2014-05-05	2	1	1		已故61584964;13691170707	1、上消化道出血 2、食管胃底静脉曲张重度破裂出血 3、肝炎肝硬化活动性失代偿期乙型 4、腹水 腹腔感染 低蛋白血症 5、重度贫血 6、胃底溃疡	1	1	0
1	55	0	1		0	2011-12-08	1	1	食管旁	0	0	0		511				17	17	17	511	2	1.5	90	0.75	45	1.5	50	0	1	0	0	0	0	0	0			2013-05-02	2011-12-21	2	1	1	2012.5郭江主治医师指示：患者肝炎肝硬化 门静脉高压症 上消化道出血，入院后完善相关检查后给予升白细胞、血小板、保肝等支持治疗后，患者精神状态有所好转，拟行TIPSS治疗预防上消化道出血，目前患者病情经内科支持治疗后病情好转，可嘱其出院，出院后继续保肝、升白细胞、血小板等治疗，择期拟行经颈静脉肝内门体分流术。	13592035176 无人接听、13938898315空号	1、肝炎肝硬化活动性失代偿期乙型 2、门脉高压 3、上消化道出血后 门脉高压性胃病 4、腹水 腹腔感染 低蛋白血症 5、高血压病	1	1	0
2	76	0	0		0	2009-10-26	1	1	脐静脉	0	0	0		491				16	16	16	491	2	1	30	0.5	15	0.5	0	1	0	0	0	0	1	0	0	1（第一次胃镜）		2011-03-01	2009-11-16	2	1	1	2010.4出院。2011.3去世	13701381358	1、原发性肝癌（可能性大）2、肝炎肝硬化 活动性 失代偿期 乙型 3、上消化道出血 4、腹水 5、腹腔感染 6、低蛋白血症 7、双侧肺炎 8、肺间质炎	1	1	0
1	43	0	1		0	2012-05-15	0			0	0	0		455		一级预防		15	15	15	455	2	1.5	60	0.75	30	1.5	20	0	1	0	0	0	0	0	0			2013-08-13	2012-05-31	2	1	1		已故13681109429、13651370004	1、肝炎肝硬化乙型代偿期活动性 重度 2、腹水 3、低蛋白血症 4、食道胃底静脉曲张硬化治疗术后	1	1	0
1	49	0	1		0	2015-09-04	0			0	0	0		454				15	15	15	454	1	1	0	1	0	1	0	0	0	1	0	0	0	0	0			2016-12-01	2015-09-09	1	1	1	2015出院。2016冬天去世	13466677011	1、上消化道出血 2、食管胃底静脉曲张破裂出血 3、失血性休克 4、肝炎肝硬化 活动性 失代偿期 乙型 5、腹腔积液 6、腹腔感染 7、低蛋白血症 8、胆管癌可能性大 9、重度贫血 10、胸腔积液 11、肺部炎症 12、胆囊结石	1	1	0
1	57	0	0		0	2014-02-21	0			0	0	0		465				15	15	15	465	2	3	50	1.5	25	1	0	0	0	1	0	0	0	0	0			2015-06-01	2014-03-11	2	1	1	2014.11门诊.2015.6去世	13832496513;	肝硬化伴食管胃底静脉曲张出血 肝炎肝硬化活动性失代偿期乙型 腹水 腹腔感染 贫血 脾功能亢进 肝内占位恶性可能性大	1	1	0
1	40	0	1		0	2013-12-24	0			1	1	0	2014-11-15	326	是			14	14	14	426	5	21	100	4.2	20	10	30	0	1	0	0	0	0	0	0			2015-02-23	2014-01-06	1	1	1	患者自2月22日下午再次出现血便，后因失血量大，于23日凌晨放置五腔三囊管压迫止血治疗。并于今日办理自动出院。	1.35525e+21	1、肝炎肝硬化 活动性 失代偿期 乙型 2、食道胃底静脉曲张破裂出血 3、低蛋白血症 4、腹水 5、腹腔感染 6、脾功能亢进 7、门脉及脾静脉栓塞 8、高血压病 9、2型糖尿病	1	1	0
1	49	1	1		1	2012-05-25	1	2	脾肾	0	0	0		393				13	13	13	393	2	1	70	0.5	35	1	40	0	1	0	0	0	0	0	0			2013-06-22	2012-06-27	1	1	1	2012.10门诊梁秀霞,2013.6.22去世	13716563672	1、上消化道出血 食管胃底静脉曲张破裂出血 失血性贫血（中度） 2、肝炎肝硬化 活动性 失代偿期 乙型 低蛋白血症（25g/L) 腹水 腹腔感染 3、2型糖尿病 4、胃底排胶溃疡	1	1	0
1	41	1	0		0	2013-04-09	0			1	1	0	2013-06-11	63	是			13	13	13	410	6	5.5	190	0.916667	31.6667	0.5	10	0	1	0	0	0	0	0	0			2014-05-24	2013-04-24	2	1	1		已故13718316345，13661349708	1、肝炎肝硬化活动性失代偿期乙型 2、食道胃底曲张破裂出血 门脉栓塞 3、贫血中度 4、慢性胆囊炎急性发作	1	1	0
2	66	0	0		0	2012-01-08	1	1	脐静脉	0	0	0		356				11	11	11	356	5	5	140	1	28	1	40	0	1	0	0	0	0	0	0			2012-12-29	2012-01-18	2	1	1	去世时间不详	89400128无人接听、13911781258	1、肝炎肝硬化 活动性 失代偿期 乙型 2、食道胃底静脉曲张破裂出血 3、食道静脉曲张硬化剂治疗后 4、腹水 5、腹腔感染 6、脾功能亢进 7、贫血 8、食道憩室 9、霉菌性食道炎	1	1	0
1	51	1	0		1	2011-07-05	0			0	0	0		346				11	11	11	346	4	3	100	0.75	25	2.5	10	0	1	0	0	0	0	0	0			2012-06-15	2011-07-13	1	1	1	血压85/46mmHg，肝癌破裂大出血，预后极差，患者家属表示知情理解，仍表示放弃有创抢救，以减少痛苦为目的。继续维持多巴胺泵点，糖盐水适当扩容。患者家属按当地风俗要求出院，已联系急救车运送，告知患者家属患者目前临终状态，随时有生命危险，途中风险高，家属表示理解，要求出院。	13810910927 、13718033791	1、肝占位介入术后 2、肝炎肝硬化 活动性 失代偿期 乙型 3、食道胃底静脉曲张重度 4、上消化道出血 5、脾大 6、胆囊炎 7、胆囊结石 8、高血压病	1	1	0
1	62	0	0		1	2014-11-07	0			0	0	0		328	是			10	10	10	328	4	5	70	1.25	17.5	1.5	10	0	1	0	0	0	0	0	0			2015-10-01	2014-11-21	2	1	1	2015.1出院，2015.10去世	13124764342;	1、急性上消化道出血 2、食管胃底静脉曲张破裂出血3、乙肝肝硬化 活动期 失代偿期 4、门脉高压症 5、脾大 脾功能亢进 三系减少 6、腹腔积液 7、营养不良性贫血 中度 8、低钾血症 9、2型糖尿病	1	1	0
2	52	0	0		1	2014-08-11	0			0	0	0		322				10	10	10	322	4	4.5	70	1.125	17.5	1	10	1	0	0	0	1	0	0	0	1（第一次胃镜）		2015-06-29	2014-09-03	3	1	1		已故13601050966;	上消化道出血 食道胃底静脉曲张硬化治疗后 食道静脉曲张套扎治疗后 重度贫血 肝炎肝硬化 活动性 失代偿期 乙型 腹水 脾功能亢进 肝占位性质未明 肝癌可能性大 胆囊炎 胆囊结石 肠系膜上静脉局部栓塞 高血压 2型糖尿病 双眼糖尿病视网膜病变 双眼视网膜动脉硬化	1	1	0
1	42	0	0		0	2010-05-04	1	1	脾肾	0	0	0		284				9	9	9	284	1	0.5	40	0.5	40	0.5	40	0	1	0	0	0	0	0	0			2011-02-12	2010-05-24	1	1	1	CT示：肝右叶占位，恶性病变可能，建议MRI检查明确。肝硬化、脾大、腹水，门脉左支部分栓塞，脐静脉开放，食管下段及胃底静脉曲张，脾-肾分流。胆囊炎。因患者肝功能不佳无法行外科或介入治疗，对症治疗后好转，今日出院。出院后于武警医院行肝移植，术后未出院即去世	15201162976	肝炎后肝硬化活动性失代偿期乙型 腹水 低蛋白血症（白蛋白 22.1g/L） 脾大 脾功能亢进 肝性脑病 食道胃底静脉曲张重度 门静脉及分支血栓 右侧肾盂结石	1	1	0
1	55	0	0		0	2009-03-09	0			1	1	0	2009-11-26	262	是			9	9	9	275	1	1	0	1	0	1	0	1	0	0	0	0	1	0	0	1（第一次胃镜）		2009-12-09	2009-05-11	6	1	1		已故64002024	1.肝炎肝硬化乙型活动性失代偿期 2.消化道出血贫血 3、腹腔积液 4、腹腔感染 5、低蛋白血症 6、肝性脑病 7、脾功能亢进 8、肝肾综合症 9、低钾血症 10、门脉高压性胃病 11、双侧胸腔积液	1	1	0
1	49	1	1		1	2013-07-29	0			0	0	0		247				8	8	8	247	2	2	10	1	5	1	10	0	1	0	0	0	0	0	0			2014-04-02	2013-08-16	1	1	1	放弃有创抢救，拒绝转ICU治疗。患者4月2日6:40左右出现昏迷，叹息样呼吸。心电监护示血压54/30mmHg，心率164，呼吸26次/分。查体：压眶反射无，瞳孔散大，对光反射消失，双侧球结膜水肿，患者病情危重，随时有可能死亡，家属表示理解，要求自动出院并签字。	13651313970	1、肝炎肝硬化 活动性 失代偿期 乙型 腹水 腹腔感染 上消化道大出血 食管静脉曲张重度，胃底静脉曲张中度 肝性脑病 脾大 脾功能亢进 低白蛋白血症 2、失血性休克 3、贫血重度 4、2型糖尿病 双眼糖尿病视网膜病变 5、门脉高压性胃病 6、胆汁返流性胃炎 7、右眼黄斑出血 8、双眼视网膜浅层出血	1	1	0
2	53	0	0		1	2016-05-18	0			0	0	0		252				8	8	8	252	2	5	50	2.5	25	4	40	0	1	0	0	0	0	0	0			2017-01-25	2016-06-02	1	1	1	患者嗜睡状态，呼之可睁眼，可正常交流。心电监护：脉搏:132次/分呼吸:22次/分，血压107/72mmHg。家属要求自动出院，向其交代目前病情危重，出院存在生命危险，家属表示理解，仍坚持自动出院，并签署自动出院协议，表示责任自负。	13241634395 、15601391157	1、肝炎肝硬化 活动性 失代偿期 乙型 2、上消化道出血 3、食道胃底静脉曲张破裂出血 4、低蛋白血症 5、脾大 脾功能亢进 6、腹水 腹腔感染 7、返流性食道炎	1	1	0
2	58	1	1		0	2014-09-24	0			0	0	0		250				8	8	8	250	5	11.5	150	2.3	30	2	40	0	1	0	0	0	0	0	0			2015-06-01	2014-10-13	1	1	1		已故13693103330	1、肝炎肝硬化 活动性 失代偿期 乙型 2、食道胃底静脉曲张破裂出血 3、低蛋白血症 4、腹水 5、腹腔感染 6、脾功能亢进 7、贫血 8、2型糖尿病 9、低钾血症	1	1	0
1	51	0	0		1	2016-03-04	0			0	0	0		240	是			7	7	7	240	2	6	30	3	15	2	0	0	0	1	0	0	0	0	0			2016-10-30	2016-03-24	2	1	1	急诊，去世	15011150785空号、13691449816	1、上消化道出血 2、慢乙肝	1	1	0
1	52	1	0		1	2015-12-01	0			1	1	0	2016-04-29	150				7	7	7	214	3	3.5	40	1.16667	13.3333	1.5	10	0	1	0	0	0	0	0	0			2016-07-02	2015-12-21	2	1	1	6月2日复查HGB 54.0g/L经输血治疗，血色素较前有明显回升，患者及家属要求出院。2016.7.2去世	13436926825打错、15910374869	1、食道静脉曲张破裂出血、肝炎肝硬化活动性失代偿期乙型 腹水、腹腔感染、脾功能亢进 、低蛋白血症、胸水、胸腔感染 肝性脑病 3、失血性休克 4、重度贫血 5、酸中毒 6、高血压病3级 7、低钾血症 8、粒细胞减少症 9、双肾囊肿 10、门脉高压 11、门脉主干及右支栓塞	1	1	0
1	57	1	0		0	2009-05-06	0			0	0	0		183				6	6	6	183	2	0.5	40	0.25	20	0.5	0	1	0	0	0	0	1	0	0	1（第一次胃镜）		2009-11-05	2009-07-15	2	1	1		已故13810215777	1、肝炎肝硬化 活动性 失代偿期 乙型 2、上消化道出血 食道胃底静脉曲张破裂出血 3、腹水 4、腹腔感染 5、低蛋白血症（28.3g/l) 6、肝性脑病 7、门脉高压性胃病 8、结肠息肉 食道息肉 9、慢性浅表胃炎 10、幽门螺旋菌感染 11、胆囊炎 12、胆囊结石 13、肝囊肿 14、双肾囊肿 14、血脂异常	1	1	0
1	50	0	1		0	2009-07-17	0			0	0	0		194				6	6	6	194	1	0.5	0	0.5	0	0.5	0	1	0	0	0	0	1	0	0	1（第一次胃镜）		2010-01-27	2009-08-19	2	1	1	ICU予降门脉压力止血、保肝利尿消腹水、补充白蛋白、TPN等支持、抗感染、扩容去甲肾上腺素泵入维持血压保证脏器灌注等治疗，患者病情较稳定，肾功能不全纠正。2009年1月18日转回我科继续治疗。转入后继续保肝、抗感染、抑酸、利尿、补充白蛋白治疗。后患者出现I型肝肾综合症，肾功能进行性恶化，进展至尿毒症期。经放置腹腔引流管，持续放腹水，患者病情稳定20余天。2010年1月26日，患者出现浅昏迷，家属因个人原因要求回家，定于今日自动出院。	80273822	肝炎肝硬化 乙型 活动性 失代偿期 急性上消化道出血 失血性休克 食管胃底静脉曲张破裂出血 脾大 脾功能亢进 腹水 胸腔积液 肺部感染 腹腔感染 TIPS术后状态	1	1	0
1	51	0	0		1	2009-04-24	0			0	0	0		203				6	6	6	203	2	1	20	0.5	10	0.5	20	0	1	0	0	0	0	0	0			2009-11-13	2009-05-15	1	1	1		已故89460210、13661278647	1、上消化道大出血 失血性休克 食管静脉曲张破裂出血 2、肝炎肝硬化 活动性 失代偿期 乙型 食管胃底静脉曲张重度 低蛋白血症 腹水 脾大 脾功能亢进 右侧胸腔积液 3、十二指肠球部溃疡 4、左侧肺炎 5、肝血管瘤 6、肝囊肿 7、左肾多发囊肿	1	1	0
2	75	0	0		1	2015-06-02	0			0	0	0		202				6	6	6	202	1	1	10	1	10	1	10	0	1	0	0	0	0	0	0			2015-12-21	2015-07-02	1	1	1		已故13701193808已故	肝炎肝硬化 活动性 失代偿期 乙型、腹水、低蛋白血症、脾大、脾功能亢进、食管胃底静脉曲张破裂出血、肝肾综合征、肾功能不全、高血压III级 极高危、重度贫血、肾性贫血、2型糖尿病 、二尖瓣返流、下肢动脉粥样硬化、返流性食管炎、便秘、痔疮、失眠。	1	1	0
1	51	1	1		1	2010-10-22	0			0	0	0		167				5	5	5	167	3	2	50	0.666667	16.6667	1	10	1	0	0	0	1	0	0	0	1（第一次胃镜）		2011-04-07	2010-11-15	2	1	1	入院后消化道出血复发2次，经保肝、止血、降门脉压、抗感染、利尿、支持、五腔三囊管压迫止血等治疗后出血停止。反复消化道出血，外科会诊建议待病情进一步恢复后行脾切断流术减少出血风险，患者及家属因个人原因要求出院继续调养等待手术时机。但在此期间患者仍有出血风险，家属知情同意后杨玉英主治医师同意其好转出院。家属抱怨医院护士不管病人，导致患者自己做完检查后走回病房途中大出血，因此去世	13429791840无人接听、13611084695	1、肝炎肝硬化 活动性 失代偿期 乙型、食道胃底静脉曲张破裂出血、肝性脑病、腹水、腹腔感染、右侧胸腔积液、低蛋白血症 2、2型糖尿病 3、反流性食管炎 4、肠道菌群失调	1	1	0
1	50	0	0		1	2012-08-29	0			0	0	0		157				5	5	5	157	1	0.5	30	0.5	30	0.5	30	0	1	0	0	0	0	0	0			2013-02-02	2012-09-05	1	1	1	抢救，大脑中动脉动脉瘤出血，签字出院	18604472395	1、上消化道出血 食管胃底静脉曲张破裂出血 2、肝炎肝硬化 活动性 失代偿期 乙型 脾大 3、胆囊结石	1	1	0
1	62	1	0		0	2016-10-27	0			0	0	0		156				5	5	5	156	3	5	50	1.66667	16.6667	1	10	0	1	0	0	0	0	0	0			2017-04-01	2016-12-09	1	1	1	2017.3.1入院后予静脉点滴异甘草酸镁抗炎保肝，还原型谷胱甘肽清除氧自由基，多烯磷脂酰胆碱保护肝细胞膜，丁二磺酸腺苷蛋氨酸利胆退黄，胸腺五肽注射液调节免疫，前列地尔改善微循环。热量及维生素B族和维生素C。维持电解质平稳。补液加强支持治疗。出院1月后去世	18945330888 、18611402911	肝炎肝硬化活动性失代偿期乙型 腹水、腹腔感染、低蛋白血症、双侧胸水、脾大、脾功能亢进 食道胃底静脉曲张破裂出血 失血性休克 胆汁淤积性肝炎 重度贫血 缺血性肠坏死切除术后 低钾血症 低钠血症 低血糖 代谢性酸中毒 慢性非萎缩性胃炎 十二指肠球部溃疡 泌尿系感染	1	1	0
2	75	0	0		0	2016-06-21	0			1	1	0	2016-08-31	71	是			5	5	5	176	1	2	10	2	10	2	10	0	1	0	0	0	0	0	0			2016-12-14	2016-07-06	1	1	1	我院死亡	17090388187,18611691248	1、食管胃底静脉曲张破裂出血 2、肝炎肝硬化 活动性 失代偿期 乙型 3、腹水 4、腹腔感染 5、低蛋白血症 6、脾大 7、胆囊结石 8、脑梗塞 9、青光眼术后 10、白内障术后11、肺部感染12、低钾血症13、胸水14、左房增大15、 肺动脉高压不除外16、I型呼吸衰竭	1	1	0
1	53	1	0		0	2013-03-13	1	1	脐静脉	0	0	0		133				4	4	4	133	4	5.5	80	1.375	20	3	30	0	1	0	0	0	0	0	0			2013-07-24	2013-04-02	2	1	1		已故15010793319	1、上消化道大出血 2、食道胃底静脉曲张破裂出血可能性大 3、消化性溃疡出血不除外 4、乙肝肝硬化失代偿期 5、脾大 6、脾功能亢进 7、低白蛋白血症 8、腹水 9、腹腔感染？ 10、消化性溃疡	1	1	0
1	59	0	0		0	2016-06-06	1	2	脾肾	0	0	0		148				4	4	4	148	3	6.5	100	2.16667	33.3333	4	40	0	1	0	0	0	0	0	0			2016-11-01	2016-06-21	2	1	1	2016.10出院，2016.11去世	15901445487	1、肝炎肝硬化活动性失代偿期乙型 2、脾大 脾功能亢进 3、腹水 4、低蛋白血症 5、食道胃底静脉曲张重度 6、门脉高压 7、慢性肝衰竭 8、2型糖尿病 9、肠道菌群失调 10、继发性肺结核 11、反流性食道炎12、低钾血症	1	1	0
1	39	1	0		0	2013-06-20	1	2	食管旁	0	0	0		127				4	4	4	127	2	0	70	0	35	0	30	0	0	0	1	0	0	0	0			2013-10-25	2013-07-05	2	1	1	患者神志不清，呼之不应，躁动，情绪不稳定，不能回答问题，不配合输液抽血检查。不配合查体。不配合心电监护。考虑患者目前考虑肝衰竭、肝性脑病躁动，向家属交代病情，预后极差，随时有生命危险，患者妻子表示对预后清楚，因个人经济原因，放弃一切诊治，并签字自动出院。	15810176896	1、上消化道出血 食道胃底静脉曲张破裂出血 2、败血症 3、肝炎肝硬化活动性失代偿期乙型 、腹水、腹腔感染 、右侧胸水 、低蛋白血症 、脾大、脾功能亢进 、食道胃底静脉曲张 、白细胞减少症 4、门脉高压性胃病 5、慢性浅表性胃炎 6、反流性食管炎 7、肝囊肿 8、胆囊炎 9、右肾囊肿 10、低钾血	1	1	0
1	55	1	0		0	2011-01-07	0			0	0	0		131				4	4	4	131	1	1	40	1	40	1	40	0	1	0	0	0	0	0	0			2011-05-18	2011-01-15	1	1	1		已故60493271 、13520439322	1、肝炎肝硬化活动性失代偿期乙型 2、食道静脉曲张破裂出血、食道胃底静脉曲张重度、聚桂醇+组织胶治疗后、失血性贫血 3、腹水、腹腔感染 4、低白蛋白血症 5、脾功能亢进 6、肝囊肿 7、上呼吸道感染	1	1	0
1	39	0	0		0	2013-05-06	0			0	0	0		125				4	4	4	125	2	2	50	1	25	1	10	0	1	0	0	0	0	0	0			2013-09-08	2013-05-22	1	1	1		已故13381366988，13321156388	1、肝炎肝硬化 活动性 失代偿期 乙型 2、上消化道出血 3、失血性贫血 4、低白蛋白血症 5、脾大 6、门脉高压 7、门脉血栓 8、食管胃底静脉曲张 9、慢性肾功能衰竭尿毒症期	1	1	0
1	47	0	0		0	2014-03-13	1	2	脾肾	0	0	0		110				3	3	3	110	1	2.5	50	2.5	50	2.5	50	0	1	0	0	0	0	0	0			2014-07-01	2014-04-02	1	1	1	2014.4建议患者出院继续保肝、提高基础状态后来我院复查再次考虑介入手术治疗。出院3个月去世	13605491889;	1、肝炎肝硬化 活动性 失代偿期 乙型 2、腹水 3、腹腔感染4、低蛋白血症 5、脾功能亢进症 6、食管胃底静脉曲张破裂出血 7、2型糖尿病 8、阴囊水肿	1	1	0
1	41	0	0		0	2009-09-09	0			0	0	0		109				3	3	3	109	1	2	0	2	0	2	0	0	0	1	0	0	0	0	0			2009-12-27	2009-12-23	2	1	1		已故13311366930	1、胆管癌 2、肝炎肝硬化 活动性 失代偿期 乙型 上消化道出血3、腹水 4、腹腔感染 5、反流性食管炎 6、低蛋白血症alb 28g/l 7、慢性胆系感染 8、胸水 胸腔感染 9.肝性脑病 10.低钾血症 11.低钠血症 12.消化道溃疡 13.门脉栓塞	1	1	0
1	43	1	0		0	2011-11-04	0			0	0	0		112				3	3	3	112	2	2.5	70	1.25	35	2	50	0	1	0	0	0	0	0	0			2012-02-24	2011-11-20	2	1	1	2012.2门诊，去世时间不详	13661365741	1、上消化道大出血 食管胃底静脉曲张破裂出血 失血性贫血（重度） 失血性休克 2、肝炎肝硬化 活动性 失代偿期 乙型 腹水 腹腔感染 低蛋白血症（26.6g/L） 脾大 脾功能亢进 3、胃底溃疡合并出血 4、反流性食管炎 5、营养性贫血 6、低钾血症	1	1	0
1	56	0	0		0	2011-08-17	0			0	0	0		92				3	3	3	92	2	1	30	0.5	15	1	10	1	0	0	0	1	0	0	0	1（第一次胃镜）		2011-11-17	2011-09-29	3	1	1	患者病情危重，家属理解病情，要求自动出院，当地医院继续抢救肝衰竭，。	13718584967	1、肝炎肝硬化 活动性 失代偿期 乙型 2、腹水 3、腹腔感染 4、食道胃底静脉曲张 5、左侧胸腔积液	1	1	0
1	52	1	0		1	2015-10-12	0			0	0	0		91				3	3	3	91	2	6	80	3	40	3.5	40	0	1	0	0	0	0	0	0			2016-01-11	2015-10-26	2	1	1	患者家属联系999急救车到院，患者处于昏迷状态，双侧瞳孔等大等圆，对光反射存在。心电监护示：心率130次/分，呼吸29次/分，血压139/89mmHg，SPO2 100%，告知家属患者病情及转运风险，签署自动出院书，患者在家属及999医护人员陪同下离院。	13693556148、15001072713	1、食道胃底静脉曲张破裂出血 2、组织胶+聚桂醇治疗 3、肝炎肝硬化活动性失代偿期乙型 4、腹水 5、腹腔感染 6、低蛋白血症 7、脾功能亢进 8、肾功能不全 9、代谢性酸中毒 10、电解质紊乱 11、高钾血症 12、低钙血症 13、低钾血症 14、重度贫血 15、2型糖尿病 16、胆囊结石	1	1	0
1	43	1	0		1	2013-03-15	1	1	脾肾	0	0	0		78				2	2	2	78	1	1.5	50	1.5	50	1.5	50	0	1	0	0	0	0	0	0			2013-06-01	2013-04-03	1	1	1	3-28行胃镜下胃底曲张静脉硬化治疗，经治疗后出血停止，大便转黄，便潜血阴性。恢复进食后患者无不适。张珂副主任代主治医师查房通知患者出院。2013.6去世	13845792530	门脉高压症 食道胃底静脉曲张破裂出血 脾大 脾功能亢进 肝炎肝硬化 活动性 失代偿期 乙型 腹水 腹腔感染 胸水 肠系膜上静脉血栓 重度贫血 门脉高压性胃病 幽门螺旋杆菌感染	1	1	0
1	44	0	1		1	2015-02-15	1	1	食管旁	0	0	0		61				2	2	2	61	2	2	80	1	40	2	40	1	0	0	0	1	0	0	0	1（第一次胃镜）		2015-04-17	2015-03-09	3	1	1	拒绝TACE，要求出院，ChildB-C级，回去就大出血死亡	13121975686打错、15847836536	1、肝炎肝硬化 活动性 失代偿期 乙型 2、食道静脉曲张破裂出血 3、脾大 脾功能亢进 4、低蛋白血症 5、腹水 6、腹腔感染 7、十二指肠球部溃疡 8、幽门螺杆菌感染	1	1	0
1	45	0	0		1	2012-08-08	0			0	0	0		68				2	2	2	68	1	1	10	1	10	1	10	0	1	0	0	0	0	0	0			2012-10-15	2012-09-03	1	1	1	门诊。2012.9.3：患者于2012-8-29 出现黑便，考虑出现消化道出血，胃镜提示食道胃底静脉曲张重度，破裂出血后；胃溃疡H1；组织胶+聚桂醇治疗；并予以生长抑素止血治疗，奥美拉唑抑酸，保护胃黏膜，继续补液支持治疗；但患者出血未停止，30日出现呕血，在积极止血、抑酸同时予以五腔三囊管压迫止血，患者出血逐渐停止，食道囊和胃囊放气，放气后未呕血、黑便，现病情暂时未定，但仍需进一步住院治疗，但患者及家属要求自动出院，请示韩宁主治医师后指示患者签字后自动很粗远，后果自负！	13718549860	肝炎肝硬化 活动型 失代偿期 乙型 腹水 腹腔感染 胸腔积液 上消化道出血 组织胶+聚贵醇治疗后 原发性肝癌不除外 肝动脉栓塞术后 胃溃疡H1 肺部感染 肝血管瘤	1	1	0
1	52	1	0		1	2015-09-25	0			0	0	0		81				2	2	2	81	4	6	80	1.5	20	3	30	0	1	0	0	0	0	0	0			2015-12-15	2015-10-10	2	1	1		已故13811631788、15011037201	1、肝炎肝硬化 活动性 失代偿期 乙型 2、肝性脑病 3、食管胃底静脉曲张破裂出血 4、脾大 5、腹水 6、低蛋白血症 7、右肺炎症 8、冠心病 9、急性冠脉综合征 10、陈旧前壁心梗 11、心功能III级 12、冠脉搭桥术后 13、高血压病 14、反流性食管炎 15、肝内结节性质待定 16、营养性贫血（中度）	1	1	0
2	47	0	0		1	2010-12-03	0			0	0	0		73				2	2	2	73	1	1	40	1	40	1	40	1	0	0	0	1	0	0	0	1（第一次胃镜）		2011-02-14	2010-12-14	2	1	1	2010.12胃镜检查：食道胃底静脉曲张重度食道胃底静脉聚桂醇、组织胶硬化+食道静脉套扎治疗 2周后复查。彩超检查：肝硬化 肝内回声结节状 胆囊壁毛糙 肝内胆汁淤积 脾大 腹水 未及胸水。明确上述诊断，经胃镜及止血药物治疗后出血停止。外科会诊意见：门脉高压症，建议转外科治疗。皇甫竞坤主治医师指示：患者经内镜及药物治疗，出血停止，向其交代出院后病情可能出现反复甚至加重，且胃镜治疗后应复查，但患者及家属仍坚持出院，且示不良后果自负。于2pm自动出院。经胃镜下治疗及内科药物止血治疗，现出血停止。今自动出院。出院2-3个月去世	13311098917	肝炎肝硬化 活动性 失代偿期 乙型 上消化道出血 食道胃底静脉曲张破裂出血 食道胃底静曲张静脉聚桂醇、组织胶硬化、套扎治疗术后 腹水 腹腔感染 低蛋白血症 脾大 脾功能亢进 贫血 低钾血症 2型糖尿病	1	1	0
1	64	0	0		0	2015-05-04	1	1	脾肾	1	1	0	2015-05-14	10				1	1	1	17	1	1.5	20	1.5	20	1.5	20	1	0	0	0	1	0	0	0	1（第一次胃镜）		2015-05-21	2015-05-11	2	1	1	现患者出血未停止，血象升高明显，患者家属要求自动出院，前往当地医院继续诊治，签字出院。患者反应迟钝，仍有间断排血便。	13401145375、18516886859	1、上消化道出血 2、肝硬化伴有食管胃底静脉曲张破裂出血 3、肝炎肝硬化 活动性 失代偿期 乙型 4、腹水 5、脾功能亢进 6、贫血 7、2型糖尿病	1	1	0
2	32	0	0		1	2014-02-12	1	2	脾肾+脐静脉	0	0	0		26				1	1	1	26	1	4	0	4	0	4	0	0	0	1	0	0	0	0	0			2014-03-10	2014-03-10	1	1	1		已故13661154358;18653832998	1、肝炎肝硬化 活动性 失代偿期 乙型 2、上消化道出血 3、腹水 腹腔感染 4、食道胃底静脉曲张 5、低蛋白血症 6、贫血 7、蛋白尿	1	1	0
1	52	0	0		0	2010-06-09	0			1	0	1	2011-11-01	510				1	1	1	40	1	1	60	1	60	1	60	0	1	0	0	0	0	0	0			2010-07-19	2010-07-19	1	1	1	患者HBV-DNA 阳性，阿德福韦酯10mg qd抗病毒治疗。转入外科后7.14出血一次，再次予五腔三囊管压迫止血，目前出血已停止，五腔三囊管放气。完善检查，目前患者肝功凝血功能差，有门脉系统广泛栓子，大量腹水，肝功严重萎缩，已失去常规手术机会，患者今日要求转院。请示张珂主治医师，准予今日转院治疗。	13311532815	1.门脉高压症食管胃底静脉曲张破裂出血脾大脾功能亢进腹水腹腔感染门脉系统广泛血栓 2.肝炎后肝硬化乙型失代偿期 3.终末期肝病 4.低蛋白血症 25.9g/l 5.严重贫血	1	1	0
1	36	0	0		0	2010-05-15	0			1	0	1	2011-10-01	504				1	1	1	10	1	0.5	40	0.5	40	0.5	40	0	1	0	0	0	0	0	0			2010-05-25	2010-05-25	1	1	1	电子胃镜示：食管胃底静脉曲张重度 破裂出血 聚桂胶硬化 组织胶治疗 1周后复查。2010.5.22患者出现呕血，予三腔管压迫止血．予生长抑素降门脉压出血治疗.患者要求自动出院，后果自负,门诊随诊。	15201391092	1、肝炎肝硬化 活动性 失代偿期 乙型 2、上消化道出血 腹水 腹腔感染	1	1	0
1	36	1	1		1	2010-07-26	0			1	0	1	2011-08-01	371				1	1	1	15	1	1	50	1	50	1	50	0	1	0	0	0	0	0	0			2010-08-10	2010-08-10	1	1	1	患者主因间断腹胀1年半，黑便1月，加重伴呕血3天入院，1个月前出现柏油样，于当地医院诊断为消化出血，给予内科止血治疗后大便转黄，后患者出现腹水、腹腔感染。3天前于住院期间无诱因出现呕血，当日间断呕吐红色胃内容物量约800ml，此后2日每日间断排黑红色血便4-5次，曾出现一过性意识丧失，血压最低在80/40mmHg左右，考虑患者目前消化道出血未得到有效控制，血红蛋白水平最低降至28g/L,入院后给予补液、输血、降低门静脉压力、五腔三囊管压迫止血等抢救治疗。28/7行胃镜下聚桂醇，组织胶治疗后出血停止，补充红细胞后血红蛋白上升至60g/L左右。术后患者出现肝功能异常加重，腹胀、诊断为腹水、腹腔感染、低蛋白血症。给予积极保肝、调节免疫、抗感染、利尿等治疗。4/8，患者再次便血，急诊复查胃镜提示未见胃内活动性出血，食道、胃底曲张静脉实变，表面可见少量糜烂。给予生长抑素等降低门静脉压力、抑制胃酸等…	13784853903	消化道出血 食道胃底镜面曲张破裂出血 胃镜下止血术后 失血性贫血（重度）失血性休克 肝炎肝硬化 活动性 失代偿期 乙型 腹水 腹腔感染 门静脉栓塞 低蛋白血症（23g/L）	1	1	0
1	45	0	0		1	2013-07-10	0			0	0	0		5				1	1	1	5	1	1	10	1	10	1	10	0	1	0	0	0	0	0	0			2013-07-15	2013-07-15	1	1	1	考虑患者随时心跳骤停，予肾上腺素1mg静推，心率血压继续下降，至22：43心率41bpm血压34/17mmhg，出现室性异博，予心外按压，同时予肾上腺素1mg间断静推，间隔3-5min/次，予碳酸氢钠纠酸，上调多巴胺泵速至30ug/kg.min。至22：53血无创压回升至115/15mmhg，心率120bpm左右，SPO2 仍不能测及脉搏，停止心外按压。至23：00股静脉穿刺成功，泵入去甲肾升压，23：15股动脉穿刺成功，行有创动脉监测，心率167bpm，ABP 153/55mmhg。23：20再次约同型红细胞悬液800ml输注，计算胃管内引流量约550ml，色红，无尿；急查血气PH 7.06,PCO2 25.7MMHG,PO2 39MMHG,BE -23MMOL/L,HCO3 7.3MMOL/L,SPO2 53%,LAC 12.1MMOL/L.提示严重代酸，再次予碳酸氢钠250ml静点…	13683360883	1、食道胃底静脉曲张破裂出血 失血性休克 失血性贫血 2、慢性肝衰竭 3、肝炎肝硬化，活动性，失代偿期，乙型 腹水 腹腔感染 脾功能亢进 低蛋白血症 4、代谢性酸中毒。	1	1	0
1	55	0	0		0	2013-05-28	0			0	0	0		58				1	1	1	58	2	1	80	0.5	40	1	50	0	1	0	0	0	0	0	0			2013-07-25	2013-06-12	6	1	1	已故	1.35217e+21	1、肝炎肝硬化乙型活动性失代偿期伴食道胃底静脉曲张硬化治疗 2、腹水 腹腔感染 3、低蛋白血症 4、食道胃底静脉破裂出血 5、高血压病	1	1	0
1	52	0	0		1	2010-09-25	0			0	0	0		30				1	1	1	30	1	0	60	0	60	0	60	0	0	0	1	0	0	0	0			2010-10-25	2010-10-13	1	1	1		已故52569057、13651146945	1、肝炎肝硬化 活动性 失代偿 乙型 2、上消化道出血 3、脾功能亢进 脾大 4、2型糖尿病	1	1	0
1	53	1	0		0	2014-01-21	0			0	0	0		16				1	1	1	16	2	2	50	1	25	1	10	0	1	0	0	0	0	0	0			2014-02-06	2014-01-30	2	1	1		已故60420791；15810888936；13581881284	1、肝硬化伴食道胃底静脉曲张破裂出血 2、肝炎肝硬化 活动性 失代偿期 乙型 3、脾大 脾亢 4、腹水 5、肝内占位 恶性肿瘤可能性大 6、低蛋白血症 7、贫血 8、胆囊结石 胆囊炎	1	1	0
1	59	1	0		0	2011-08-25	0			0	0	0		41				1	1	1	41	1	1	0	1	0	1	0	0	0	1	0	0	0	0	0			2011-10-05	2011-09-23	1	1	1	2011.9出院，2011.10.5去世	13910853880	肝炎肝硬化 活动性 失代偿期 乙型 食道重度曲张静脉破裂出血 应激性溃疡 脾功能亢进 腹水 腹腔感染 低蛋白血症（ 27.3g/L） 肝囊肿 肾囊肿 心房纤颤	1	1	0
1	34	0	0		0	2013-12-01	0			0	0	0		44				1	1	1	44	3	5	80	1.66667	26.6667	1.5	30	0	1	0	0	0	0	0	0			2014-01-14	2013-12-19	3	1	1	已故	1.87365e+21	上消化道大出血 2、食管胃底静脉曲张破裂出血可能性大 3、肝炎肝硬化 活动性 失代偿期 乙型	1	1	0
1	51	1	0		0	2012-11-28	0			0	0	0		26				1	1	1	26	1	1	10	1	10	1	10	0	1	0	0	0	0	0	0			2012-12-24	2012-12-24	1	1	1		已故13716602336，15801446973	上消化道出血	1	1	0
1	55	1	0		0	2013-01-27	0			0	0	0		48				1	1	1	48	1	0	0	0	0	0	0	1	0	0	0	0	0	0	1	1（第一次胃镜）		2013-03-16	2013-02-07	1	1	1		已故13811029933已故	1、食道胃底静脉曲张破裂出血 2、肝炎肝硬化 乙型 活动性 失代偿期 重度 3、腹水 4、低蛋白血症 5、胃溃疡出血不除外	1	1	0
1	52	0	0		1	2015-02-26	0			0	0	0		26				1	1	1	26	2	2	20	1	10	1	10	0	1	0	0	0	0	0	0			2015-03-24	2015-03-24	2	1	1	神清，精神弱，无恶心呕吐，昨日无排便，尿量2100ml。查体：体温:36.6℃脉搏:78次/分舒张压:57mmHg收缩压:91呼吸:20次/分皮肤巩膜重度黄染，腹软，移动性浊音可疑，双下肢无水肿。患者及家属因个人原因要求出院，告知患者病情危重，路途中存在风险，患者及家属表示理解，坚持要求出院，表示自行承担后果并签字，请示于浩主治医师准予自动出院。	13804795090关机、13948275888	1、慢加急性肝衰竭 2、肝炎肝硬化 活动性 失代偿期 乙型3、肝性脑病4、低蛋白血症5、腹水 6、腹腔感染7、胆汁淤积8、食道胃底静脉曲张破裂持续出现组织胶+聚桂醇治疗9、贲门溃疡10、中度贫血11、低钾血症12、原发性肝癌可能性大	1	1	0
1	47	0	1		1	2016-08-31	0			0	0	0		12	是			1	1	1	12	1	1.5	0	1.5	0	1.5	0	0	0	1	0	0	0	0	0			2016-09-12	2016-09-12	1	1	1	肾功能未见好转，且患者出现持续腹胀、乏力等症状，肝衰竭未见好转，患者家属要求出院前往当地医院继续诊治，请示上级医师，准予带药出院。	15933158539	1、食管胃底静脉曲张破裂出血 2、乙肝肝硬化 失代偿期 3、慢性肝衰竭 4、肝肾综合症 5、脾大 脾功能亢进 6、腹腔积液 7、右侧胸腔积液 8、重度低蛋白血症 9、贫血 中度10、急性胆系感染 11、胆石症 12、双侧腹股沟疝	1	1	0
1	46	0	0		1	2011-09-14	0			0	0	0		43				1	1	1	43	1	1	40	1	40	1	40	0	1	0	0	0	0	0	0			2011-10-27	2011-10-27	1	1	1		已故13708516256、15985245778	1、多脏器功能衰竭、2、慢性肝衰竭 3、肝炎肝硬化 活动性 失代偿期 乙型 4、腹水 5、腹腔感染 6、食管胃底静脉曲张 7、上消化道出血 8、低蛋白血症 9、肝性脑病 10、肝肾综合征 11 肺部感染、12、尿路感染 13 深部真菌感染 14、尿路结石 15、肾积水	1	1	0
1	43	1	0		1	2010-10-19	0			1	1	0	2010-11-21	33	是			1	1	1	33	1	0	30	0	30	0	30	0	0	0	1	0	0	0	0			2010-11-21	2010-11-01	1	1	1		已故、13716906036、13436819873	1、门脉高压症 食道胃底静脉破裂出血 脾大 2、肝炎后肝硬化 活动性 代偿期 乙型 3、十二指肠球部溃疡H2期 4、先天性膈疝修补术后 5、ERCP+乳头切开取石术后	1	1	0
1	36	1	1		0	2011-11-25	0			1	1	0	2011-12-15	20				1	1	1	28	1	1.5	60	1.5	60	1.5	60	0	1	0	0	0	0	0	0			2011-12-23	2011-12-19	1	1	1	12-20胸水培养肺炎克雷伯氏菌肺炎亚种 ，对舒普深中敏，停止舒普深，12-23 改为头孢噻肟舒巴坦抗感染治疗。12-23 lac 12.46 mmol/L。血气提示代谢性酸中毒，血乳酸继续升高明显。2pm灌肠后患者排褐色稀便一次，量约50g，结合患者胃潜血阳性，考虑存在消化道出血，继续予抑酸、降门脉压止血治疗。高钾，酸中毒，予高糖加胰岛素对抗，同时予碳酸氢钠125ml静点纠酸治疗。8pm家属要求自动出院。出院时患者神志清楚，心电监护HR120bpm、R 20bpm、BP110/50mmHg、SpO2100%，家属签字后出院。	13601057020	慢加急性肝衰竭 肝炎肝硬化活动性失代偿期 乙型 上消化道出血 食道胃底曲张静脉破出血 失血性贫血 组织胶聚桂醇治疗术后 腹水 腹腔感染（耐万古霉素屎肠球菌） 低蛋白血症 脾大 脾功能亢进 肝肾综合征 肝性脑病 右下肢蜂窝织炎 多发脓肿形成 右足背及内踝脓肿切开引流术后 胸腔积液 胸腔感染 胸腔出血 霉菌性食道炎	1	1	0
1	44	1	0		0	2011-08-16	0			1	1	0	2011-09-01	16				1	1	1	7	2	2.5	30	1.25	15	1	10	0	1	0	0	0	0	0	0			2011-08-23	2011-08-23	2	1	1	超声提示肝硬化，肝内实性占位（肝Ca不除外），门脉系统广泛栓塞，胆囊壁双边，脾大，腹水。8月17日行胃镜检查：食道静脉曲张中度，贲门胃底静脉曲张中度，破裂出血后白色血栓头形成。破裂出血处予聚桂醇+组织胶治疗。此后患者黑便减少，血红蛋白升至55.1g/L。8月20日下午再次开始血便、呕血，血红蛋白下降，患者拒绝再行五腔三囊管压迫止血，积极予禁食水，止血、降门脉压、抑酸、扩容补液、输血等内科抢救措施。介入科会诊：患者门脉系统广泛栓塞，为介入治疗预防出血的相对禁忌症。外科会诊建议情况许可下行腹部增强CT检查了解肝脏情况，决定可否手术治疗预防出血。患者门脉广泛栓塞、门脉压力升高明显，短期内反复出血，病情危重，预后极差，再次向家属充分交代病情后，8月22日再行胃镜检查：食道胃底静脉曲张重度，胃底曲张静脉出血，予聚桂醇+组织胶治疗。此后患者未再呕血，血便逐渐减少，至8月23日患者未再排便，仍精神、体…	13381469392 、13521061267	1、食管胃底静脉曲张破裂出血、组织胶+聚桂醇治疗后、失血性休克、失血性贫血（重度） 2、肝炎肝硬化活动性失代偿期乙型、腹水、低蛋白血症、脾大、门脉广泛栓塞 3、肝内占位性质未明，原发性肝癌可能性大 4、胆囊炎	1	1	0
2	60	0	0		0	2013-01-25	0			0	0	0		22				1	1	1	22	2	3	50	1.5	25	2	10	0	1	0	0	0	0	0	0			2013-02-16	2013-02-06	2	1	1	2013.2.6出院。出院10余天去世	13833026986	1、肝炎肝硬化 活动性 失代偿期 乙型 2、食道胃底静脉曲张破裂出血 3、腹水 4、腹腔感染 5、脾大 6、脾功能亢进 7、低蛋白血症24g/L 8、门脉左支栓塞 9、高血压病 10、低钾血症	1	1	0
2	53	0	0		0	2011-12-10	0			0	0	0		16				1	1	1	16	2	1.5	100	0.75	50	1.5	60	0	1	0	0	0	0	0	0			2011-12-26	2011-12-26	2	1	1	患者仍有食欲差、腹胀、尿黄症状，复查肝功ALT 128.4U/L，AST 192.5U/L，TBIL 358umol/L，DBIL 206.8umol/L，ALB 30.4g/L，CHE 2099U/L，PTA 31%，考虑肝脏功能进一步恶化，患者及家属要求今日出院，请示段英主治医师后，鉴于病情平稳，今日自动出院，出院后建议到当地医院继续治疗。	1510762656	1、肝炎肝硬化 活动性 失代偿期 乙型 2、上消化道出血 3、腹水 4、腹腔感染 5、低蛋白血症	1	1	0
2	58	0	0		0	2014-02-20	0			0	0	0		42				1	1	1	42	1	2	10	2	10	2	10	0	1	0	0	0	0	0	0			2014-04-03	2014-04-03	1	1	1	患者呈昏睡状态，不易叫醒，无法交流，仍发热，，肝性脑病难以纠正，病情危重，自动出院。	13911047214;	1、肝炎肝硬化乙型活动性失代偿期 2、慢加急性肝衰竭 3、腹腔感染 4、腹腔内出血 5、低蛋白血症 6、肝性脑病 7、食道胃底静脉曲张破裂出血 8、胆汁淤积性肝病 9、喘息性支气管炎 10、肺部感染 11、高血压病 12、反流性食管炎 13、低钾血症 14、高钠血症 15、代谢性碱中毒	1	1	0
2	55	0	0		0	2008-12-18	0			1	1	0	2009-11-01	318				1	1	1	12	1	0	0	0	0	0	0	1	0	0	0	0	0	0	1	1（第一次胃镜）		2008-12-30	2008-12-30		1	1	患者拒绝三腔两囊管止血治疗，由于对药物皮肤过敏，予非那根25mg对症处理；7、胃镜下止血治疗。经上述抢救治疗后，患者血压逐渐平稳，神志清楚、四肢温暖。当天下午于局麻下行胃镜检查：食道静脉曲张重度，破裂出血，贲门静脉轻度曲张，予套扎治疗后患者安返病房。后家属来电患者有：精神系统疾病，拒绝治疗。嘱患者禁食水，予一级护理。患者未再呕血，排血便数次，血便性状逐渐变淡，血便量逐次减少。继续补充葡萄糖盐水500ml维持血容量，继续泵入善宁降低门脉压，予信法丁抑酸保护胃粘膜，立止血止血治疗，并监测血压及心率变化。12月25日患者血常规提示HGB与前相同，故暂停输血，继续补液支持治疗，并予善宁维持降门脉压力，予信法丁静点保护消化道，并予立止血止血治疗。因体温37摄氏度左右，予利复星以预防感染。12月27日患者精神可，未诉发热、腹胀尿少，未再呕血，无头晕头痛等症。查体：BP：100∕60mmHg，T：36…	13819999619、122415211541	1、肝炎后肝硬化 活动性 失代偿期 乙型 2、上消化道大出血 3、胃镜下食道胃底静脉套扎术后 4、原发性肝癌可能性大	1	1	0
2	56	0	0		0	2014-03-31	0			1	1	0	2014-10-01	184				1	1	1	11	1	2.5	60	2.5	60	2.5	60	0	1	0	0	0	0	0	0			2014-04-11	2014-04-11	1	1	1	予胃镜下止血治疗，对症保肝、升白，纠正贫血，恩替卡韦抗病毒，头孢噻肟舒巴坦抗感染。请我院外科会诊，建议1月后行脾切除术。患者腹胀减轻，呕血、黑便停止，腹部压痛、反跳痛阴性。病情好转。去世时间不详	15539000066;13948464686	1、肝炎肝硬化 活动性 失代偿期 乙型 2、食道胃底静脉曲张破裂出血后 3、腹水 4、腹腔感染 5、脾功能亢进	1	1	0
[truncated: 106 more columns]
